# Supplementary material for: Towards superior mRNA caps accessible by click chemistry: synthesis and translational properties of triazole-bearing oligonucleotide cap analogs
Source: Royal Society of Chemistry journal article supplement (doi:10.1039/d3ra00026e), 2023-01-01
Supplement: d3ra00026e1.pdf [file d3ra00026e1.pdf]

# Towards superior mRNA caps accessible by click chemistry: synthesis and translational properties of triazole-bearing oligonucleotide cap analogs

Mateusz Kozarski <sup>a, b</sup>, Karolina Drazkowska<sup>b</sup>, Marcelina Bednarczyk <sup>a, b</sup>, Marcin Warminski <sup>a</sup>, Jacek Jemielity <sup>b\*</sup>, Joanna Kowalska <sup>a\*</sup>

<sup>a</sup>Division of Biophysics, Institute of Experimental Physics, Faculty of Physics, University of Warsaw, Pasteura 5, 02-093 Warsaw, Poland

<sup>b</sup>Centre of New Technologies, University of Warsaw, Banacha 2c, 02-097 Warsaw, Poland

## List of contents

|                                                                                                                          |           |
|--------------------------------------------------------------------------------------------------------------------------|-----------|
| <b>MATERIALS AND METHODS</b> .....                                                                                       | <b>2</b>  |
| <b>TABLES</b> .....                                                                                                      | <b>2</b>  |
| TABLE S1. HPLC METHODS USED WITH AGILENT TECHNOLOGIES SERIES 1200 OR SHIMADZU RF-20A.....                                | 2         |
| TABLE S2. THE AFFINITY OF CAP ANALOGS FOR EIF4E AT 20 °C DETERMINED USING FQT EXPERIMENTS. ....                          | 3         |
| TABLES S3. NMR SPECTRA, HR MS, HPLC PROFILES OF SYNTHETIZED MODIFIED NUCLEOTIDES AND CAP ANALOGUES. ....                 | 3         |
| 5'-N <sub>3</sub> APG 12A .....                                                                                          | 3         |
| 5'-N <sub>3</sub> A <sub>M</sub> PG 12B.....                                                                             | 7         |
| 5'-N <sub>3</sub> C <sub>2</sub> H <sub>4</sub> PA <sub>M</sub> PG 12C.....                                              | 10        |
| M <sup>7</sup> GPPP-TR-APG 1 .....                                                                                       | 12        |
| M <sup>7</sup> GPPP-TR-A <sub>M</sub> PG 2 .....                                                                         | 15        |
| M <sup>7</sup> GPPP-CH <sub>2</sub> -TR-APG 3.....                                                                       | 17        |
| M <sup>7</sup> GPPP-CH <sub>2</sub> -TR-A <sub>M</sub> PG 4 .....                                                        | 20        |
| M <sup>7</sup> GPPP-C <sub>2</sub> H <sub>4</sub> -APG 5 .....                                                           | 22        |
| M <sup>7</sup> GPPP-C <sub>2</sub> H <sub>4</sub> -A <sub>M</sub> PG 6 .....                                             | 25        |
| M <sup>7</sup> GPPPPOCH <sub>2</sub> -TR-APG 7 .....                                                                     | 28        |
| M <sup>7</sup> GPPPPOCH <sub>2</sub> -TR-A <sub>M</sub> PG 8.....                                                        | 31        |
| M <sup>7</sup> GPPP-TR-C <sub>2</sub> H <sub>4</sub> PA <sub>M</sub> PG 9 .....                                          | 34        |
| M <sup>7</sup> GPPPG-CARB-CH <sub>2</sub> -TR-APG (BOTH ISOMERS) 10A AND 10B.....                                        | 37        |
| 2'-OME-3'-OC <sub>3</sub> H <sub>3</sub> -ADENOSINE .....                                                                | 42        |
| 5'-MONOPHOSPHATE 2'-OME-3'-OC <sub>3</sub> H <sub>3</sub> ADENOSINE (2'-OME-3'-OC <sub>3</sub> H <sub>3</sub> AMP) ..... | 44        |
| M <sup>7</sup> GPPPA-2'-OME-3'-OC <sub>3</sub> H <sub>3</sub> .....                                                      | 47        |
| M <sup>7</sup> GPPPA <sub>M</sub> -3'-OCH <sub>2</sub> -TR-G 11.....                                                     | 50        |
| <b>FIGURES</b> .....                                                                                                     | <b>53</b> |
| FIGURE S1. MRNA PURITY .....                                                                                             | 53        |
| FIGURE S2. LUCIFERASE ACTIVITY IN RABBIT RETICULOCYTE LYSATE .....                                                       | 55        |
| FIGURE S3. SUSCEPTIBILITY TO DEGRADATION BY HDCP1/DCP2 COMPLEX. ....                                                     | 55        |

## Materials and methods

Solvents, chemical reagents, and starting materials were purchased from commercial sources. Phosphoramidites were purchased from ChemGenes (2'-O-PivOM-5'-DMT-A (N-PAC) 3'-CEP) and Link Technologies (2'-OMe-Bz-A-CE). Solid support for solid phase synthesis was purchased from GE Healthcare (Primer Support™ 5G ribo G 300 (309 μmol ribo G/g). C- phosphonate nucleotide analogues were obtained according to the previously described procedures (Walczak et al.). <sup>12</sup>-Cyanoethyl 2-bromoethyl N, N-diisopropylamino Phosphite was synthesized as previously described (Hebert et al.). <sup>2</sup> The analytical analysis and purifications were performed using Agilent Technologies Series 1200 with UV detection at 254 nm wavelength and fluorescent detection (ex, 260 nm; em. 370 nm) and Shimadzu RF-20A. For chemical reaction analysis the Gemini 3 μm NX-C18 110 Å 150 x 4.6 mm column was used with linear gradient of methanol in 0.05 M ammonium buffer, pH 5.9. For purification the Gemini 5 μm NX-C18 110 Å 150 x 10 mm column (column A) or HiChrom Vydac Denali 5 μm C18 120 Å 150 x 10 mm (column B) or Dr. Maisch VisionHT C18 Highload 25 cm x 2 cm, 10 μm (column C) were used with linear gradient of acetonitrile in 0.05 M ammonium buffer, pH 5.9. Additionally, for purification, ion-exchange chromatography on DEAD Sephadex resin A-25 (HCO<sub>3</sub><sup>-</sup> form) was used. To confirm the purity and structure of intermediate and final products high resolution mass spectrometry (HRMS) and nuclear magnetic resonance (NMR) were used. Mass spectra was recorded using Thermo Scientific LTQ Orbitrap Velos spectrometer, with the negative electrospray ionization HRMS (-) ESI. NMR spectra were recorded using a Bruker AVANCE III HD 500 MHz spectrometer equipped with a high-stability temperature unit with 5 mm PAB- BOBB/19F-1H/D Z-GRD Z119470/0188 probe at 500.24MHz (<sup>1</sup>H NMR) and 202.49 MHz (<sup>31</sup>P NMR) or Varian 400 MHz with OneNMR\_W016 probe at 399.90 MHz (1H NMR) and 161.89 MHz (<sup>31</sup>P NMR). The <sup>1</sup>H NMR and <sup>31</sup>P NMR chemical shifts (δH and δP) were reported in ppm and referenced to the respective standards: sodium 3-(trimethylsilyl)-2,2,3,3-tetradeuteropropionate (TSP, internal standard) and 20% phosphoric acid in D<sub>2</sub>O (external standard).

## Tables

**Table S1.** HPLC methods used with Agilent Technologies Series 1200 or Shimadzu RF-20A

| Analytical methods |                                |                                                |                                                       |
|--------------------|--------------------------------|------------------------------------------------|-------------------------------------------------------|
| Method             | Buffer A                       | Buffer B                                       | Gradient                                              |
| <b>A</b>           | 0.05 M ammonium buffer, pH 5.9 | 0.05 M ammonium buffer, pH 5.9/MeOH (v/v, 1/1) | Linear gradient 0%- 50% of buffer B; 15 min; 1ml/min  |
| <b>B</b>           | 0.05 M ammonium buffer, pH 5.9 | 0.05 M ammonium buffer, pH 5.9/MeOH (v/v, 1/1) | Linear gradient 0%- 100% of buffer B; 15 min; 1ml/min |
| <b>C</b>           | 0.05 M ammonium                | 0.05 M ammonium buffer,                        | Linear gradient 0%- 50% of buffer B; 7.5 min; 1ml/min |

|                            |                                |                                                   |                                                         |
|----------------------------|--------------------------------|---------------------------------------------------|---------------------------------------------------------|
|                            | buffer, pH 5.9                 | pH 5.9/MeOH (v/v, 1/1)                            |                                                         |
| <b>Preparative methods</b> |                                |                                                   |                                                         |
| <b>D</b>                   | 0.05 M ammonium buffer, pH 5.9 | 0.05 M ammonium buffer, pH 5.9/Acetonitrile (30%) | Linear gradient 0%- 50% of buffer B; 60 min; 4.7 ml/min |

**Table S2.** The affinity of cap analogs for eIF4E at 20 °C determined using FQT experiments.

The experiments were performed in triplicate. The values in table are presented as weighted averages.

| Cap No.                              | $K_{As}$ ( $\mu\text{M}^{-1}$ ) |
|--------------------------------------|---------------------------------|
| m <sup>7</sup> GpppA <sub>m</sub> pG | 29.6 ± 2.3                      |
| <b>2</b>                             | 23.8 ± 3.6                      |
| <b>4</b>                             | 29.7 ± 6.0                      |
| <b>6</b>                             | 30.7 ± 6.9                      |
| <b>8</b>                             | 20.3 ± 3.4                      |
| <b>9</b>                             | 136.1 ± 13.2                    |
| <b>10b</b>                           | 35.3 ± 8.0                      |

**Tables S3.** NMR spectra, HR MS, HPLC profiles of synthesized modified nucleotides and cap analogues.

### 5'-N<sub>3</sub>ApG 12a

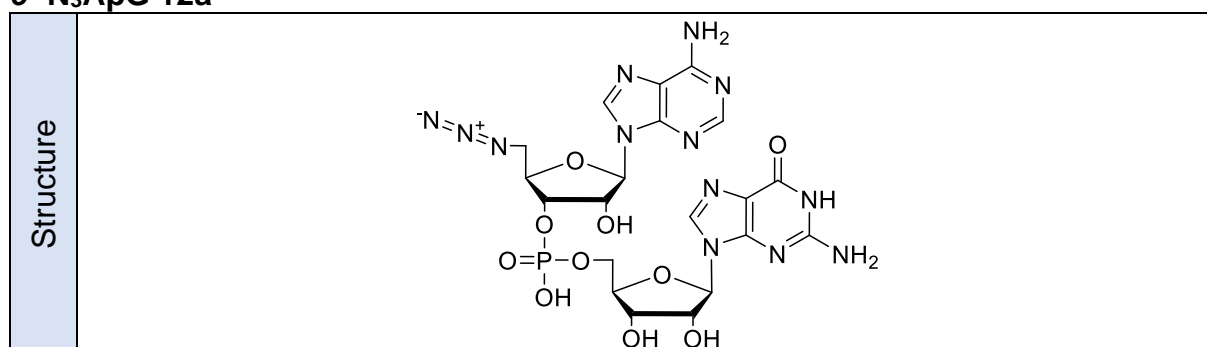

HPLC Profile

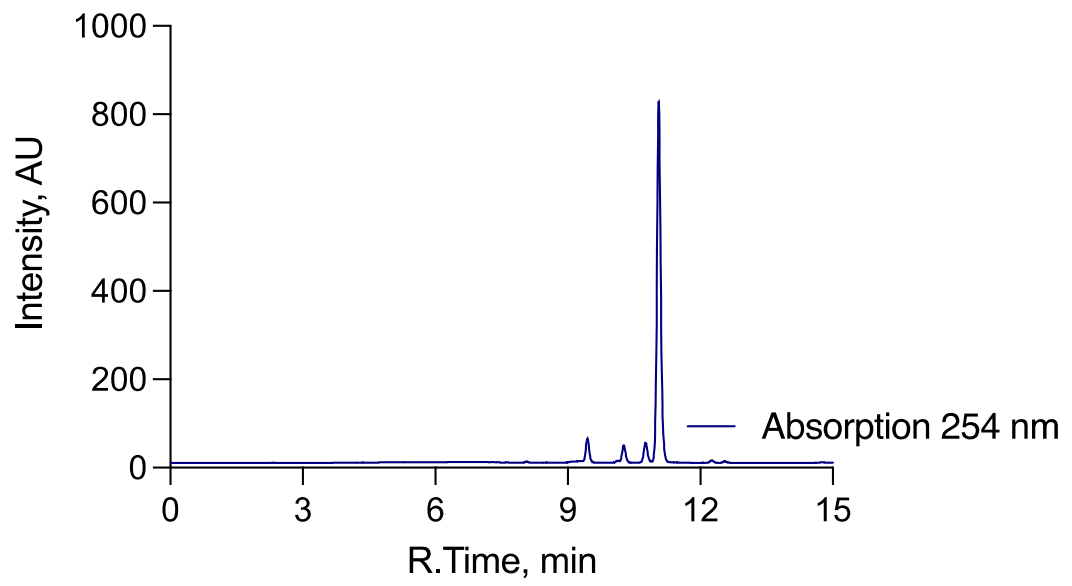

HR MS

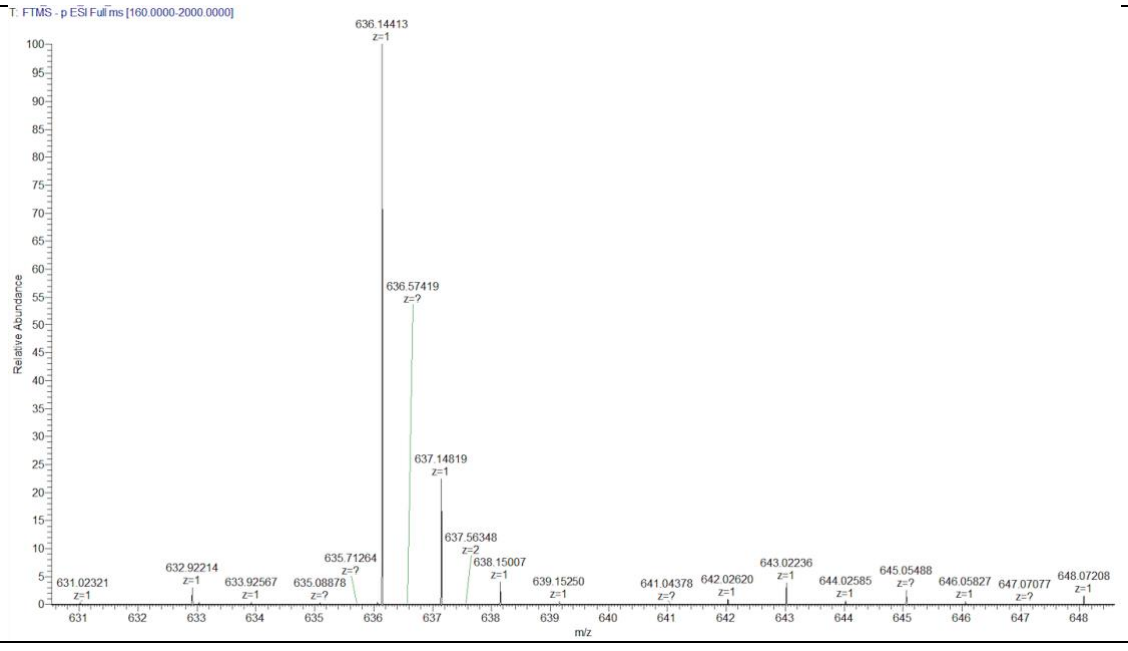

<sup>1</sup>H NMR

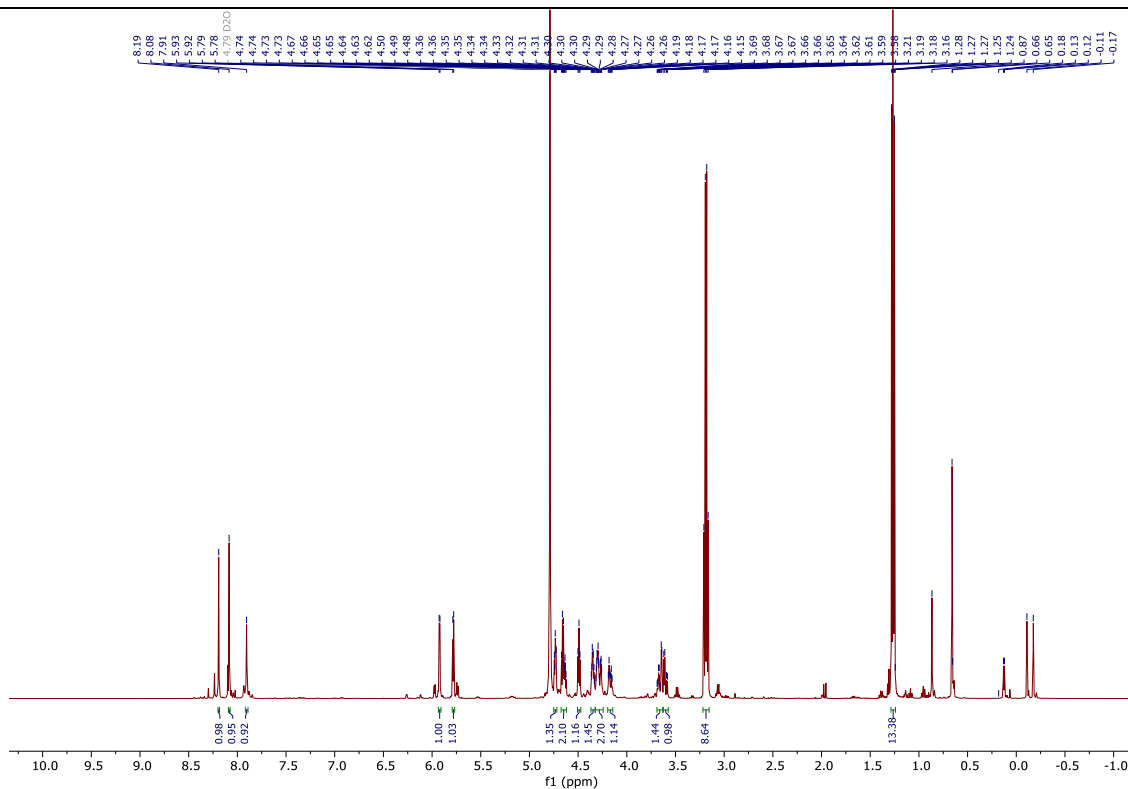

<sup>31</sup>P NMR

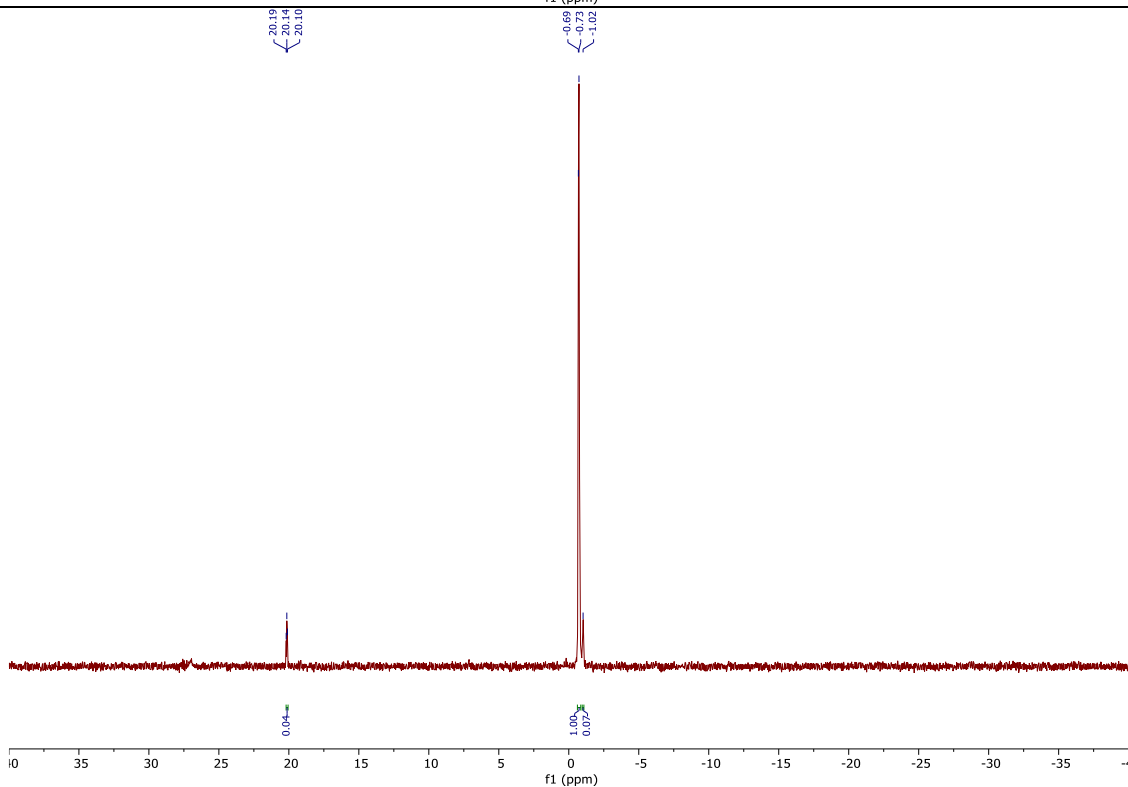

<sup>1</sup>H-<sup>1</sup>H COSY NMR

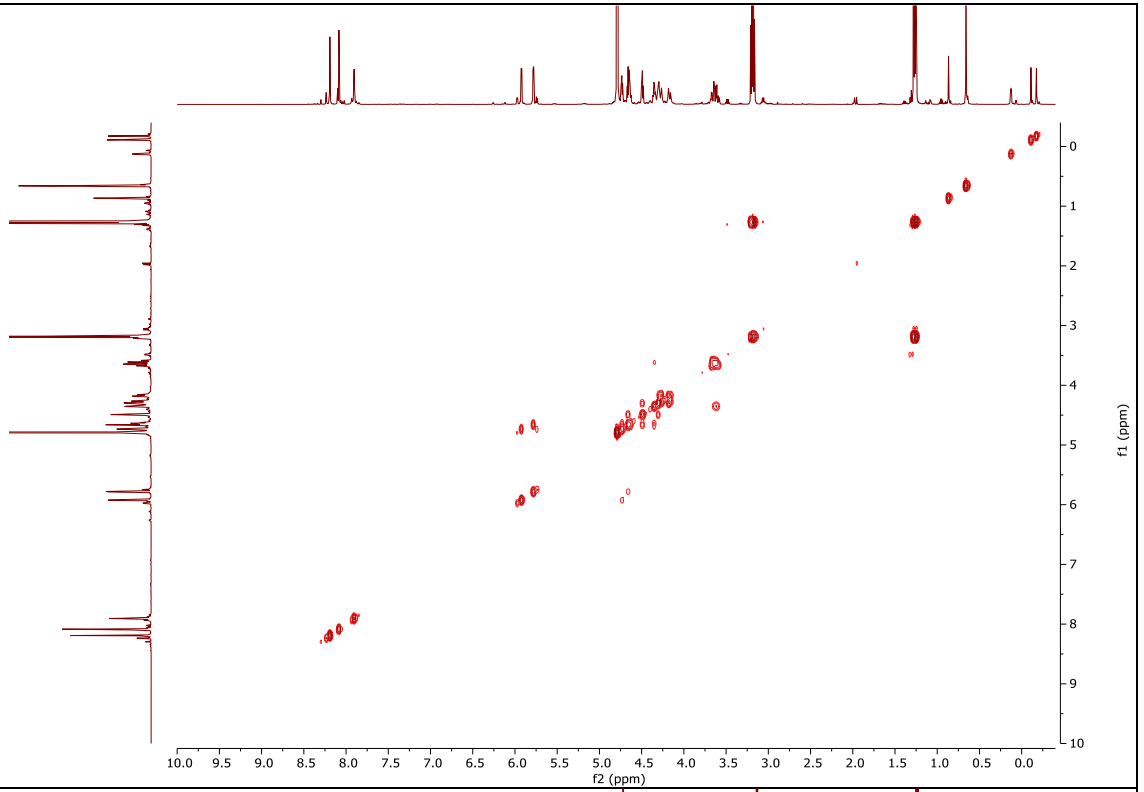

<sup>1</sup>H-<sup>13</sup>C HSQC NMR

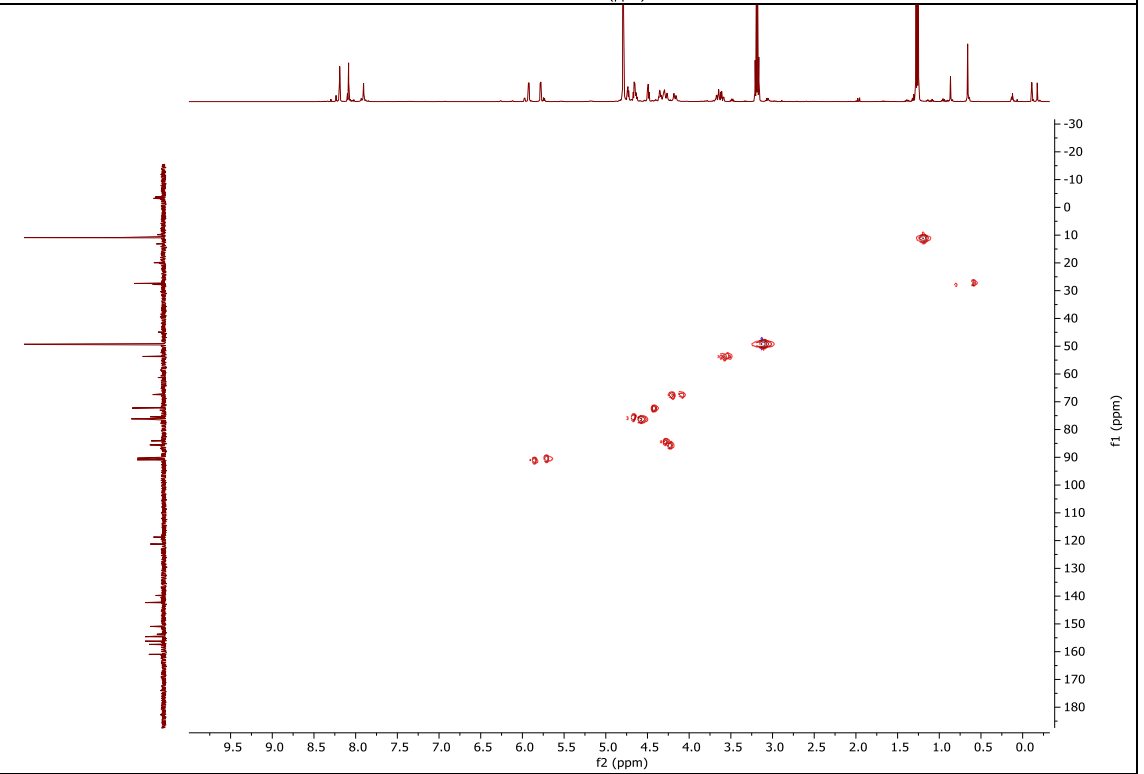

# 5'-N<sub>3</sub>AmpG 12b

| Structure    | 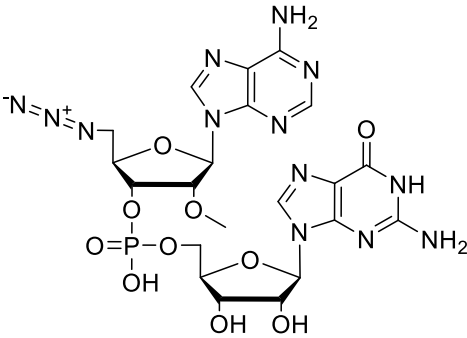 <p>The chemical structure shows a nucleotide derivative. It features a ribose sugar with a phosphate group at the 5' position and an adenine base at the 1' position. The adenine base is substituted with an azide group (-N<sub>3</sub>) at the 6-position. The ribose sugar is also substituted with a phosphate group at the 3' position, which is linked to another ribose sugar. This second ribose sugar is substituted with a phosphate group at the 5' position and a guanine base at the 1' position. The guanine base is substituted with an amino group (-NH<sub>2</sub>) at the 2-position.</p>                                                                                                                                                                                                                                                                                                                                                                                                                                                    |     |   |           |     |           |     |           |     |           |     |           |     |           |     |           |     |           |     |           |     |           |     |           |     |           |     |           |     |           |     |           |     |           |     |
|--------------|----------------------------------------------------------------------------------------------------------------------------------------------------------------------------------------------------------------------------------------------------------------------------------------------------------------------------------------------------------------------------------------------------------------------------------------------------------------------------------------------------------------------------------------------------------------------------------------------------------------------------------------------------------------------------------------------------------------------------------------------------------------------------------------------------------------------------------------------------------------------------------------------------------------------------------------------------------------------------------------------------------------------------------------------------------------------------------------------------------------------------------------------------|-----|---|-----------|-----|-----------|-----|-----------|-----|-----------|-----|-----------|-----|-----------|-----|-----------|-----|-----------|-----|-----------|-----|-----------|-----|-----------|-----|-----------|-----|-----------|-----|-----------|-----|-----------|-----|-----------|-----|
| HPLC Profile |  <p>The HPLC profile shows a single sharp peak at approximately 8.5 minutes. The y-axis is labeled 'Intensity, AU' and ranges from 0 to 2500. The x-axis is labeled 'R.Time, min' and ranges from 0 to 15. A legend indicates 'Absorption 254 nm'.</p>                                                                                                                                                                                                                                                                                                                                                                                                                                                                                                                                                                                                                                                                                                                                                                                                          |     |   |           |     |           |     |           |     |           |     |           |     |           |     |           |     |           |     |           |     |           |     |           |     |           |     |           |     |           |     |           |     |           |     |
| HR MS        |  <p>The HR MS spectrum shows relative abundance versus m/z. The y-axis is labeled 'Relative Abundance' and ranges from 0 to 100. The x-axis is labeled 'm/z' and ranges from 640 to 683. The base peak is at m/z 650.15993 (z=1). Other significant peaks are labeled with their m/z values and charge states (z).</p> <table border="1"><thead><tr><th>m/z</th><th>z</th></tr></thead><tbody><tr><td>641.02952</td><td>z=?</td></tr><tr><td>642.18611</td><td>z=?</td></tr><tr><td>643.17275</td><td>z=?</td></tr><tr><td>645.04041</td><td>z=?</td></tr><tr><td>647.03558</td><td>z=?</td></tr><tr><td>649.15292</td><td>z=?</td></tr><tr><td>650.15993</td><td>z=1</td></tr><tr><td>651.16312</td><td>z=1</td></tr><tr><td>652.16553</td><td>z=1</td></tr><tr><td>653.16829</td><td>z=1</td></tr><tr><td>655.16389</td><td>z=1</td></tr><tr><td>656.16868</td><td>z=1</td></tr><tr><td>658.12567</td><td>z=?</td></tr><tr><td>659.12888</td><td>z=1</td></tr><tr><td>661.01405</td><td>z=?</td></tr><tr><td>662.31680</td><td>z=?</td></tr></tbody></table> | m/z | z | 641.02952 | z=? | 642.18611 | z=? | 643.17275 | z=? | 645.04041 | z=? | 647.03558 | z=? | 649.15292 | z=? | 650.15993 | z=1 | 651.16312 | z=1 | 652.16553 | z=1 | 653.16829 | z=1 | 655.16389 | z=1 | 656.16868 | z=1 | 658.12567 | z=? | 659.12888 | z=1 | 661.01405 | z=? | 662.31680 | z=? |
| m/z          | z                                                                                                                                                                                                                                                                                                                                                                                                                                                                                                                                                                                                                                                                                                                                                                                                                                                                                                                                                                                                                                                                                                                                                  |     |   |           |     |           |     |           |     |           |     |           |     |           |     |           |     |           |     |           |     |           |     |           |     |           |     |           |     |           |     |           |     |           |     |
| 641.02952    | z=?                                                                                                                                                                                                                                                                                                                                                                                                                                                                                                                                                                                                                                                                                                                                                                                                                                                                                                                                                                                                                                                                                                                                                |     |   |           |     |           |     |           |     |           |     |           |     |           |     |           |     |           |     |           |     |           |     |           |     |           |     |           |     |           |     |           |     |           |     |
| 642.18611    | z=?                                                                                                                                                                                                                                                                                                                                                                                                                                                                                                                                                                                                                                                                                                                                                                                                                                                                                                                                                                                                                                                                                                                                                |     |   |           |     |           |     |           |     |           |     |           |     |           |     |           |     |           |     |           |     |           |     |           |     |           |     |           |     |           |     |           |     |           |     |
| 643.17275    | z=?                                                                                                                                                                                                                                                                                                                                                                                                                                                                                                                                                                                                                                                                                                                                                                                                                                                                                                                                                                                                                                                                                                                                                |     |   |           |     |           |     |           |     |           |     |           |     |           |     |           |     |           |     |           |     |           |     |           |     |           |     |           |     |           |     |           |     |           |     |
| 645.04041    | z=?                                                                                                                                                                                                                                                                                                                                                                                                                                                                                                                                                                                                                                                                                                                                                                                                                                                                                                                                                                                                                                                                                                                                                |     |   |           |     |           |     |           |     |           |     |           |     |           |     |           |     |           |     |           |     |           |     |           |     |           |     |           |     |           |     |           |     |           |     |
| 647.03558    | z=?                                                                                                                                                                                                                                                                                                                                                                                                                                                                                                                                                                                                                                                                                                                                                                                                                                                                                                                                                                                                                                                                                                                                                |     |   |           |     |           |     |           |     |           |     |           |     |           |     |           |     |           |     |           |     |           |     |           |     |           |     |           |     |           |     |           |     |           |     |
| 649.15292    | z=?                                                                                                                                                                                                                                                                                                                                                                                                                                                                                                                                                                                                                                                                                                                                                                                                                                                                                                                                                                                                                                                                                                                                                |     |   |           |     |           |     |           |     |           |     |           |     |           |     |           |     |           |     |           |     |           |     |           |     |           |     |           |     |           |     |           |     |           |     |
| 650.15993    | z=1                                                                                                                                                                                                                                                                                                                                                                                                                                                                                                                                                                                                                                                                                                                                                                                                                                                                                                                                                                                                                                                                                                                                                |     |   |           |     |           |     |           |     |           |     |           |     |           |     |           |     |           |     |           |     |           |     |           |     |           |     |           |     |           |     |           |     |           |     |
| 651.16312    | z=1                                                                                                                                                                                                                                                                                                                                                                                                                                                                                                                                                                                                                                                                                                                                                                                                                                                                                                                                                                                                                                                                                                                                                |     |   |           |     |           |     |           |     |           |     |           |     |           |     |           |     |           |     |           |     |           |     |           |     |           |     |           |     |           |     |           |     |           |     |
| 652.16553    | z=1                                                                                                                                                                                                                                                                                                                                                                                                                                                                                                                                                                                                                                                                                                                                                                                                                                                                                                                                                                                                                                                                                                                                                |     |   |           |     |           |     |           |     |           |     |           |     |           |     |           |     |           |     |           |     |           |     |           |     |           |     |           |     |           |     |           |     |           |     |
| 653.16829    | z=1                                                                                                                                                                                                                                                                                                                                                                                                                                                                                                                                                                                                                                                                                                                                                                                                                                                                                                                                                                                                                                                                                                                                                |     |   |           |     |           |     |           |     |           |     |           |     |           |     |           |     |           |     |           |     |           |     |           |     |           |     |           |     |           |     |           |     |           |     |
| 655.16389    | z=1                                                                                                                                                                                                                                                                                                                                                                                                                                                                                                                                                                                                                                                                                                                                                                                                                                                                                                                                                                                                                                                                                                                                                |     |   |           |     |           |     |           |     |           |     |           |     |           |     |           |     |           |     |           |     |           |     |           |     |           |     |           |     |           |     |           |     |           |     |
| 656.16868    | z=1                                                                                                                                                                                                                                                                                                                                                                                                                                                                                                                                                                                                                                                                                                                                                                                                                                                                                                                                                                                                                                                                                                                                                |     |   |           |     |           |     |           |     |           |     |           |     |           |     |           |     |           |     |           |     |           |     |           |     |           |     |           |     |           |     |           |     |           |     |
| 658.12567    | z=?                                                                                                                                                                                                                                                                                                                                                                                                                                                                                                                                                                                                                                                                                                                                                                                                                                                                                                                                                                                                                                                                                                                                                |     |   |           |     |           |     |           |     |           |     |           |     |           |     |           |     |           |     |           |     |           |     |           |     |           |     |           |     |           |     |           |     |           |     |
| 659.12888    | z=1                                                                                                                                                                                                                                                                                                                                                                                                                                                                                                                                                                                                                                                                                                                                                                                                                                                                                                                                                                                                                                                                                                                                                |     |   |           |     |           |     |           |     |           |     |           |     |           |     |           |     |           |     |           |     |           |     |           |     |           |     |           |     |           |     |           |     |           |     |
| 661.01405    | z=?                                                                                                                                                                                                                                                                                                                                                                                                                                                                                                                                                                                                                                                                                                                                                                                                                                                                                                                                                                                                                                                                                                                                                |     |   |           |     |           |     |           |     |           |     |           |     |           |     |           |     |           |     |           |     |           |     |           |     |           |     |           |     |           |     |           |     |           |     |
| 662.31680    | z=?                                                                                                                                                                                                                                                                                                                                                                                                                                                                                                                                                                                                                                                                                                                                                                                                                                                                                                                                                                                                                                                                                                                                                |     |   |           |     |           |     |           |     |           |     |           |     |           |     |           |     |           |     |           |     |           |     |           |     |           |     |           |     |           |     |           |     |           |     |

<sup>1</sup>H NMR

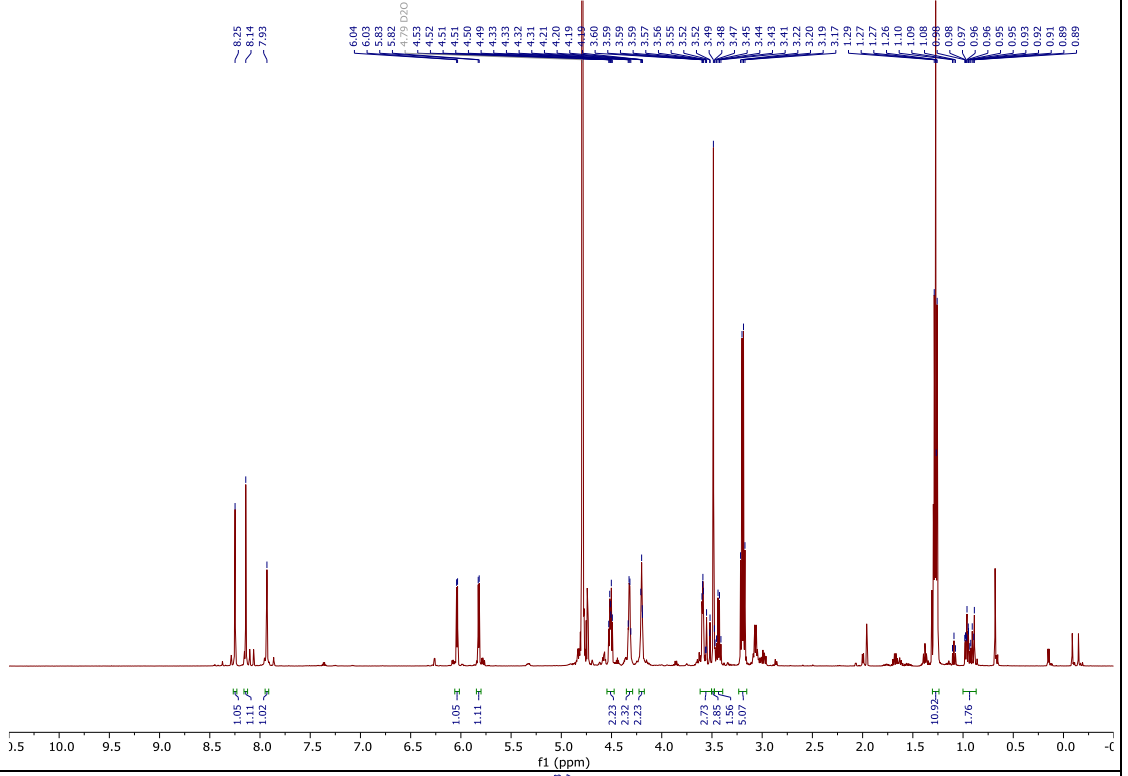

<sup>31</sup>P NMR

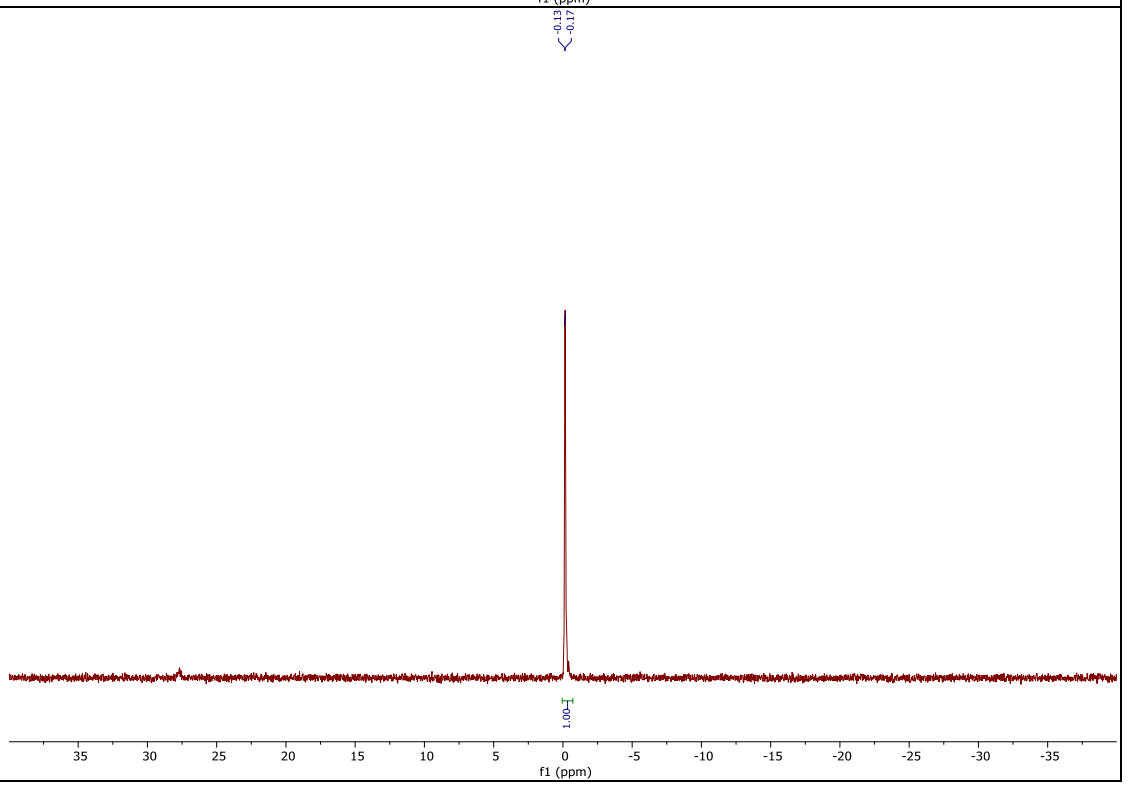



<sup>1</sup>H-<sup>1</sup>H COSY NMR

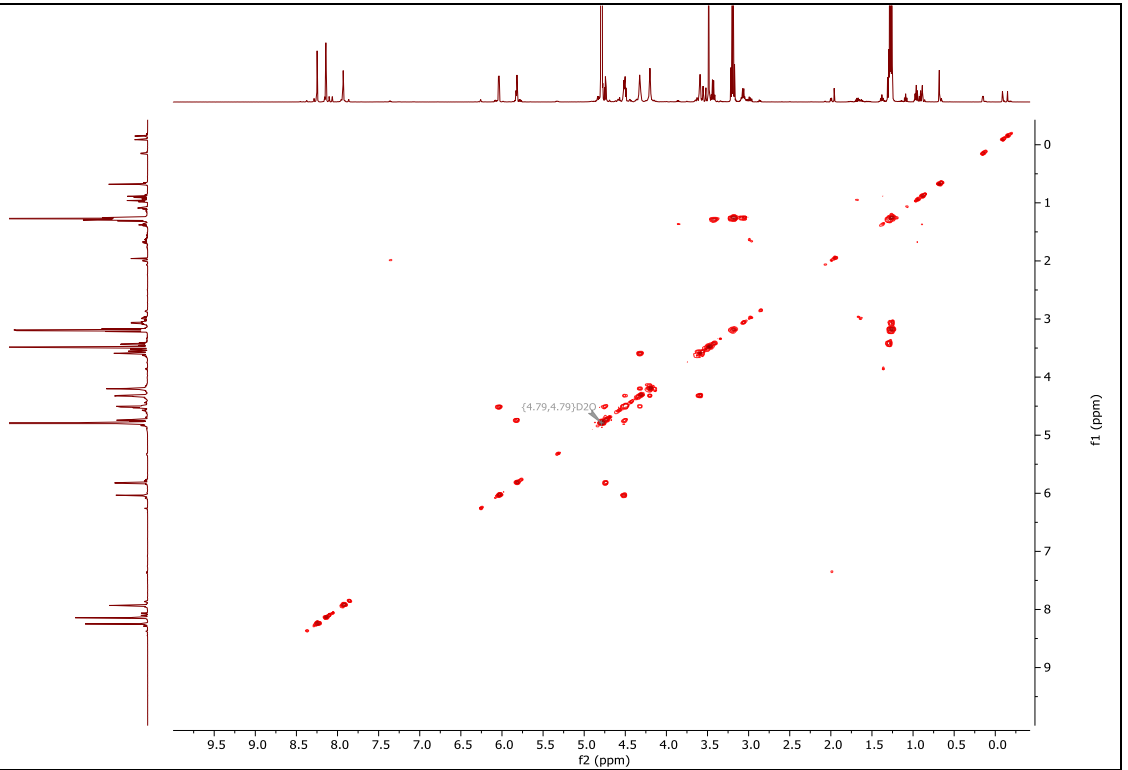

<sup>1</sup>H-<sup>13</sup>C HSQC NMR

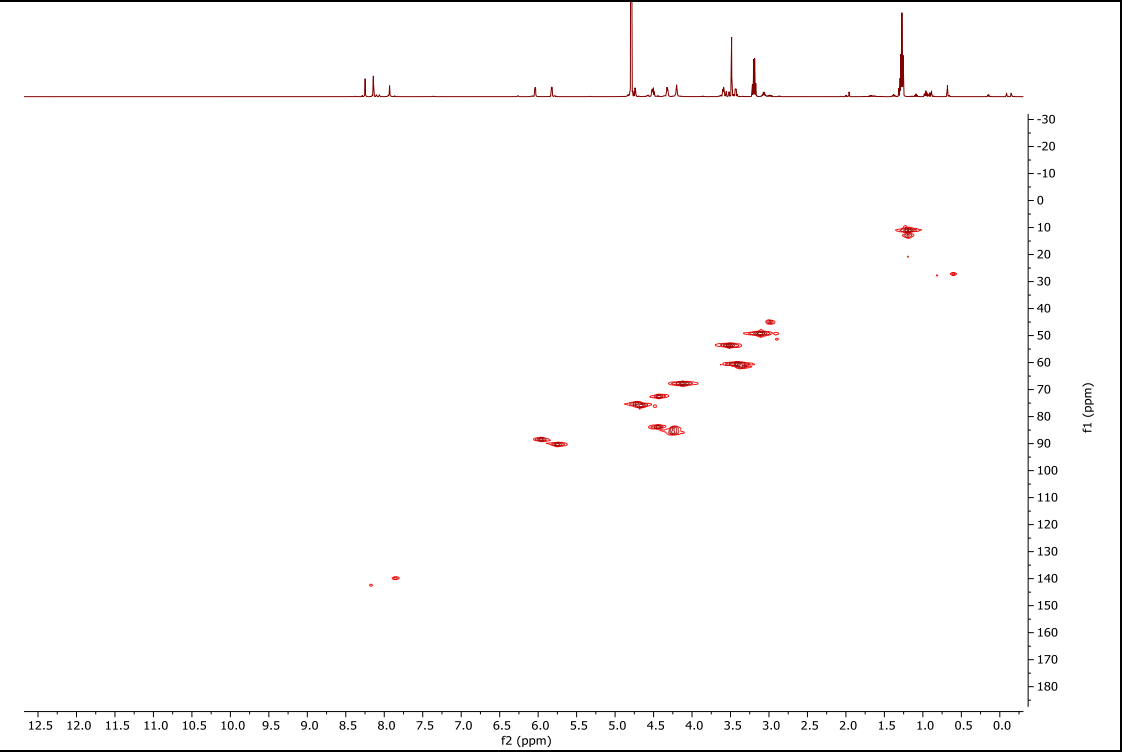

# 5'-N<sub>3</sub>C<sub>2</sub>H<sub>4</sub>pAmpG 12c

| Structure    | 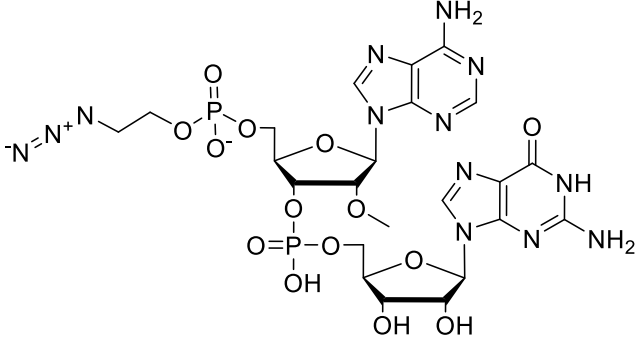                                                                                                                                                                                                                                                                                                                                                                                                                                                                                                                                                                                                                                                                                                                                                                                                                                                                           |     |   |           |     |           |     |           |     |           |     |           |     |           |     |           |     |           |     |           |     |           |     |           |     |           |     |           |     |           |     |           |     |           |     |           |     |
|--------------|--------------------------------------------------------------------------------------------------------------------------------------------------------------------------------------------------------------------------------------------------------------------------------------------------------------------------------------------------------------------------------------------------------------------------------------------------------------------------------------------------------------------------------------------------------------------------------------------------------------------------------------------------------------------------------------------------------------------------------------------------------------------------------------------------------------------------------------------------------------------------------------------------------------------------------------------------------------|-----|---|-----------|-----|-----------|-----|-----------|-----|-----------|-----|-----------|-----|-----------|-----|-----------|-----|-----------|-----|-----------|-----|-----------|-----|-----------|-----|-----------|-----|-----------|-----|-----------|-----|-----------|-----|-----------|-----|-----------|-----|
| HPLC Profile |  <p>Intensity, AU</p> <p>R.Time, min</p> <p>Absorption 254 nm</p>                                                                                                                                                                                                                                                                                                                                                                                                                                                                                                                                                                                                                                                                                                                                                                                                         |     |   |           |     |           |     |           |     |           |     |           |     |           |     |           |     |           |     |           |     |           |     |           |     |           |     |           |     |           |     |           |     |           |     |           |     |
| HR MS        | <p>T: FIMS - p ESI Full ms [160.0000-2000.0000]</p>  <p>Relative Abundance</p> <p>m/z</p> <table border="1"><thead><tr><th>m/z</th><th>z</th></tr></thead><tbody><tr><td>767.11285</td><td>z=?</td></tr><tr><td>769.06109</td><td>z=?</td></tr><tr><td>769.92874</td><td>z=?</td></tr><tr><td>772.13559</td><td>z=?</td></tr><tr><td>773.14631</td><td>z=?</td></tr><tr><td>773.88955</td><td>z=?</td></tr><tr><td>774.15205</td><td>z=1</td></tr><tr><td>774.40913</td><td>z=?</td></tr><tr><td>775.15430</td><td>z=1</td></tr><tr><td>775.41153</td><td>z=?</td></tr><tr><td>776.15688</td><td>z=1</td></tr><tr><td>777.15988</td><td>z=1</td></tr><tr><td>778.16138</td><td>z=1</td></tr><tr><td>779.15822</td><td>z=1</td></tr><tr><td>780.16073</td><td>z=1</td></tr><tr><td>781.94543</td><td>z=?</td></tr><tr><td>784.71651</td><td>z=?</td></tr></tbody></table> | m/z | z | 767.11285 | z=? | 769.06109 | z=? | 769.92874 | z=? | 772.13559 | z=? | 773.14631 | z=? | 773.88955 | z=? | 774.15205 | z=1 | 774.40913 | z=? | 775.15430 | z=1 | 775.41153 | z=? | 776.15688 | z=1 | 777.15988 | z=1 | 778.16138 | z=1 | 779.15822 | z=1 | 780.16073 | z=1 | 781.94543 | z=? | 784.71651 | z=? |
| m/z          | z                                                                                                                                                                                                                                                                                                                                                                                                                                                                                                                                                                                                                                                                                                                                                                                                                                                                                                                                                            |     |   |           |     |           |     |           |     |           |     |           |     |           |     |           |     |           |     |           |     |           |     |           |     |           |     |           |     |           |     |           |     |           |     |           |     |
| 767.11285    | z=?                                                                                                                                                                                                                                                                                                                                                                                                                                                                                                                                                                                                                                                                                                                                                                                                                                                                                                                                                          |     |   |           |     |           |     |           |     |           |     |           |     |           |     |           |     |           |     |           |     |           |     |           |     |           |     |           |     |           |     |           |     |           |     |           |     |
| 769.06109    | z=?                                                                                                                                                                                                                                                                                                                                                                                                                                                                                                                                                                                                                                                                                                                                                                                                                                                                                                                                                          |     |   |           |     |           |     |           |     |           |     |           |     |           |     |           |     |           |     |           |     |           |     |           |     |           |     |           |     |           |     |           |     |           |     |           |     |
| 769.92874    | z=?                                                                                                                                                                                                                                                                                                                                                                                                                                                                                                                                                                                                                                                                                                                                                                                                                                                                                                                                                          |     |   |           |     |           |     |           |     |           |     |           |     |           |     |           |     |           |     |           |     |           |     |           |     |           |     |           |     |           |     |           |     |           |     |           |     |
| 772.13559    | z=?                                                                                                                                                                                                                                                                                                                                                                                                                                                                                                                                                                                                                                                                                                                                                                                                                                                                                                                                                          |     |   |           |     |           |     |           |     |           |     |           |     |           |     |           |     |           |     |           |     |           |     |           |     |           |     |           |     |           |     |           |     |           |     |           |     |
| 773.14631    | z=?                                                                                                                                                                                                                                                                                                                                                                                                                                                                                                                                                                                                                                                                                                                                                                                                                                                                                                                                                          |     |   |           |     |           |     |           |     |           |     |           |     |           |     |           |     |           |     |           |     |           |     |           |     |           |     |           |     |           |     |           |     |           |     |           |     |
| 773.88955    | z=?                                                                                                                                                                                                                                                                                                                                                                                                                                                                                                                                                                                                                                                                                                                                                                                                                                                                                                                                                          |     |   |           |     |           |     |           |     |           |     |           |     |           |     |           |     |           |     |           |     |           |     |           |     |           |     |           |     |           |     |           |     |           |     |           |     |
| 774.15205    | z=1                                                                                                                                                                                                                                                                                                                                                                                                                                                                                                                                                                                                                                                                                                                                                                                                                                                                                                                                                          |     |   |           |     |           |     |           |     |           |     |           |     |           |     |           |     |           |     |           |     |           |     |           |     |           |     |           |     |           |     |           |     |           |     |           |     |
| 774.40913    | z=?                                                                                                                                                                                                                                                                                                                                                                                                                                                                                                                                                                                                                                                                                                                                                                                                                                                                                                                                                          |     |   |           |     |           |     |           |     |           |     |           |     |           |     |           |     |           |     |           |     |           |     |           |     |           |     |           |     |           |     |           |     |           |     |           |     |
| 775.15430    | z=1                                                                                                                                                                                                                                                                                                                                                                                                                                                                                                                                                                                                                                                                                                                                                                                                                                                                                                                                                          |     |   |           |     |           |     |           |     |           |     |           |     |           |     |           |     |           |     |           |     |           |     |           |     |           |     |           |     |           |     |           |     |           |     |           |     |
| 775.41153    | z=?                                                                                                                                                                                                                                                                                                                                                                                                                                                                                                                                                                                                                                                                                                                                                                                                                                                                                                                                                          |     |   |           |     |           |     |           |     |           |     |           |     |           |     |           |     |           |     |           |     |           |     |           |     |           |     |           |     |           |     |           |     |           |     |           |     |
| 776.15688    | z=1                                                                                                                                                                                                                                                                                                                                                                                                                                                                                                                                                                                                                                                                                                                                                                                                                                                                                                                                                          |     |   |           |     |           |     |           |     |           |     |           |     |           |     |           |     |           |     |           |     |           |     |           |     |           |     |           |     |           |     |           |     |           |     |           |     |
| 777.15988    | z=1                                                                                                                                                                                                                                                                                                                                                                                                                                                                                                                                                                                                                                                                                                                                                                                                                                                                                                                                                          |     |   |           |     |           |     |           |     |           |     |           |     |           |     |           |     |           |     |           |     |           |     |           |     |           |     |           |     |           |     |           |     |           |     |           |     |
| 778.16138    | z=1                                                                                                                                                                                                                                                                                                                                                                                                                                                                                                                                                                                                                                                                                                                                                                                                                                                                                                                                                          |     |   |           |     |           |     |           |     |           |     |           |     |           |     |           |     |           |     |           |     |           |     |           |     |           |     |           |     |           |     |           |     |           |     |           |     |
| 779.15822    | z=1                                                                                                                                                                                                                                                                                                                                                                                                                                                                                                                                                                                                                                                                                                                                                                                                                                                                                                                                                          |     |   |           |     |           |     |           |     |           |     |           |     |           |     |           |     |           |     |           |     |           |     |           |     |           |     |           |     |           |     |           |     |           |     |           |     |
| 780.16073    | z=1                                                                                                                                                                                                                                                                                                                                                                                                                                                                                                                                                                                                                                                                                                                                                                                                                                                                                                                                                          |     |   |           |     |           |     |           |     |           |     |           |     |           |     |           |     |           |     |           |     |           |     |           |     |           |     |           |     |           |     |           |     |           |     |           |     |
| 781.94543    | z=?                                                                                                                                                                                                                                                                                                                                                                                                                                                                                                                                                                                                                                                                                                                                                                                                                                                                                                                                                          |     |   |           |     |           |     |           |     |           |     |           |     |           |     |           |     |           |     |           |     |           |     |           |     |           |     |           |     |           |     |           |     |           |     |           |     |
| 784.71651    | z=?                                                                                                                                                                                                                                                                                                                                                                                                                                                                                                                                                                                                                                                                                                                                                                                                                                                                                                                                                          |     |   |           |     |           |     |           |     |           |     |           |     |           |     |           |     |           |     |           |     |           |     |           |     |           |     |           |     |           |     |           |     |           |     |           |     |

<sup>1</sup>H NMR

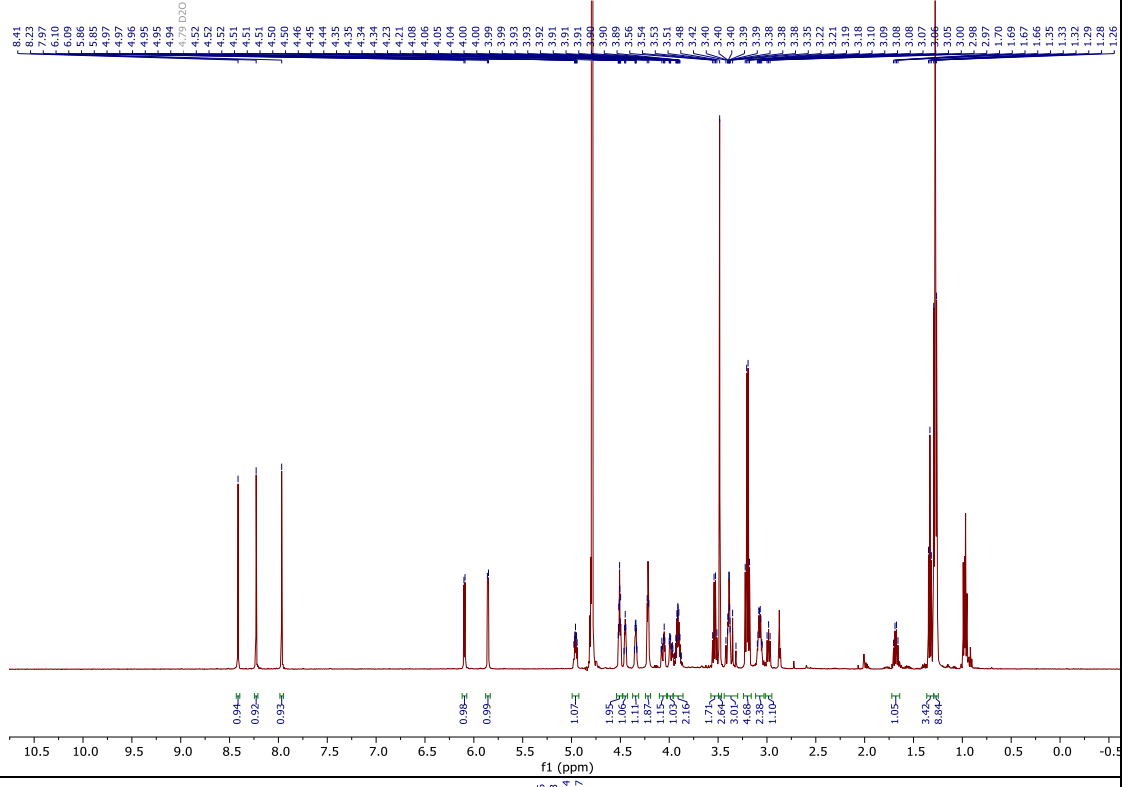

<sup>31</sup>P NMR

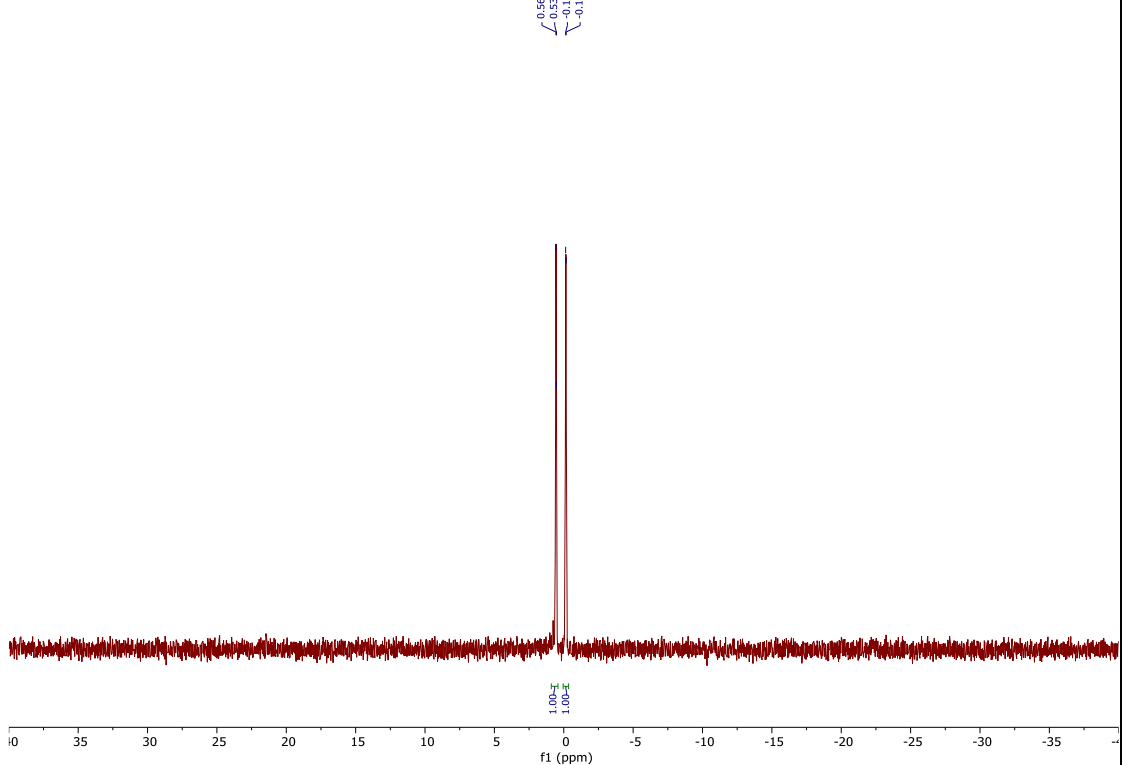

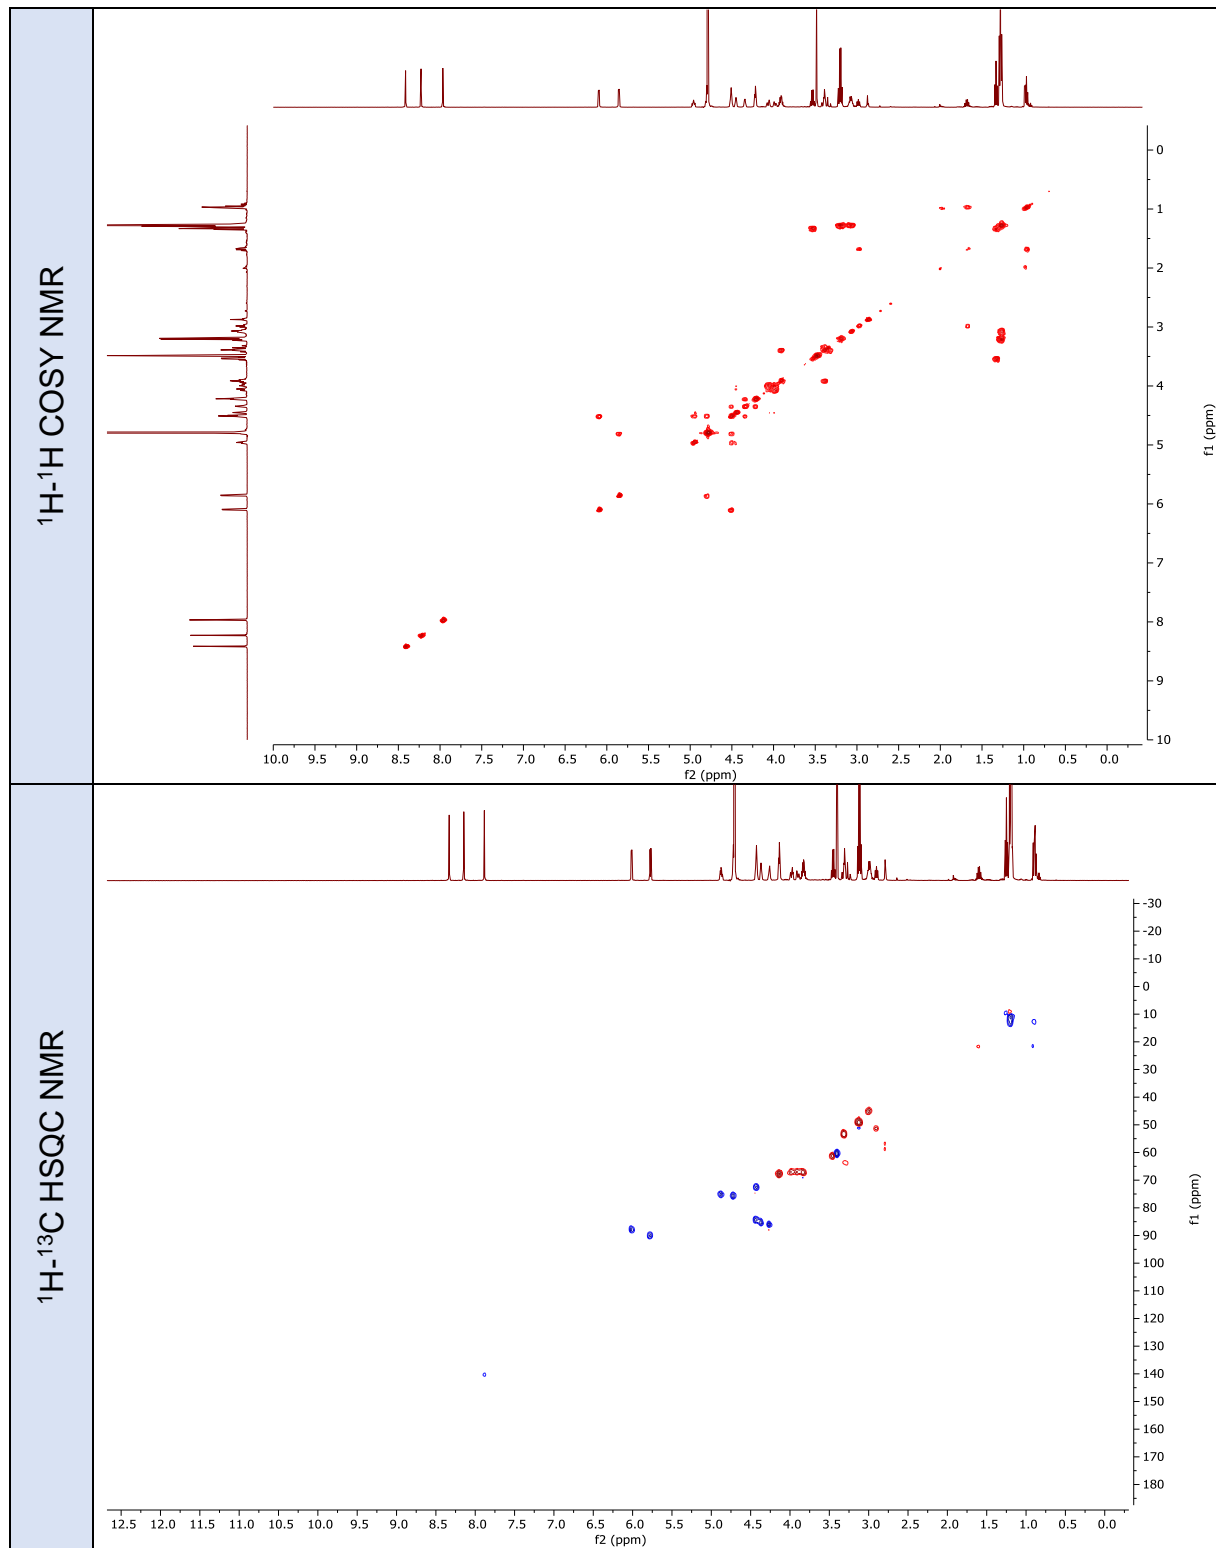

**m<sup>7</sup>Gppp-tr-ApG 1**

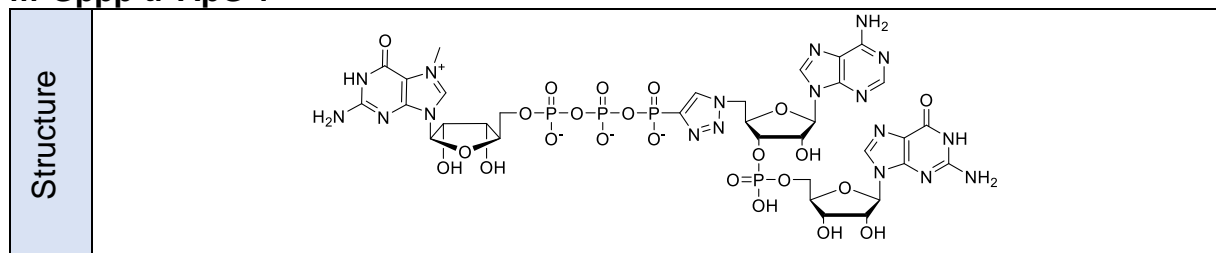

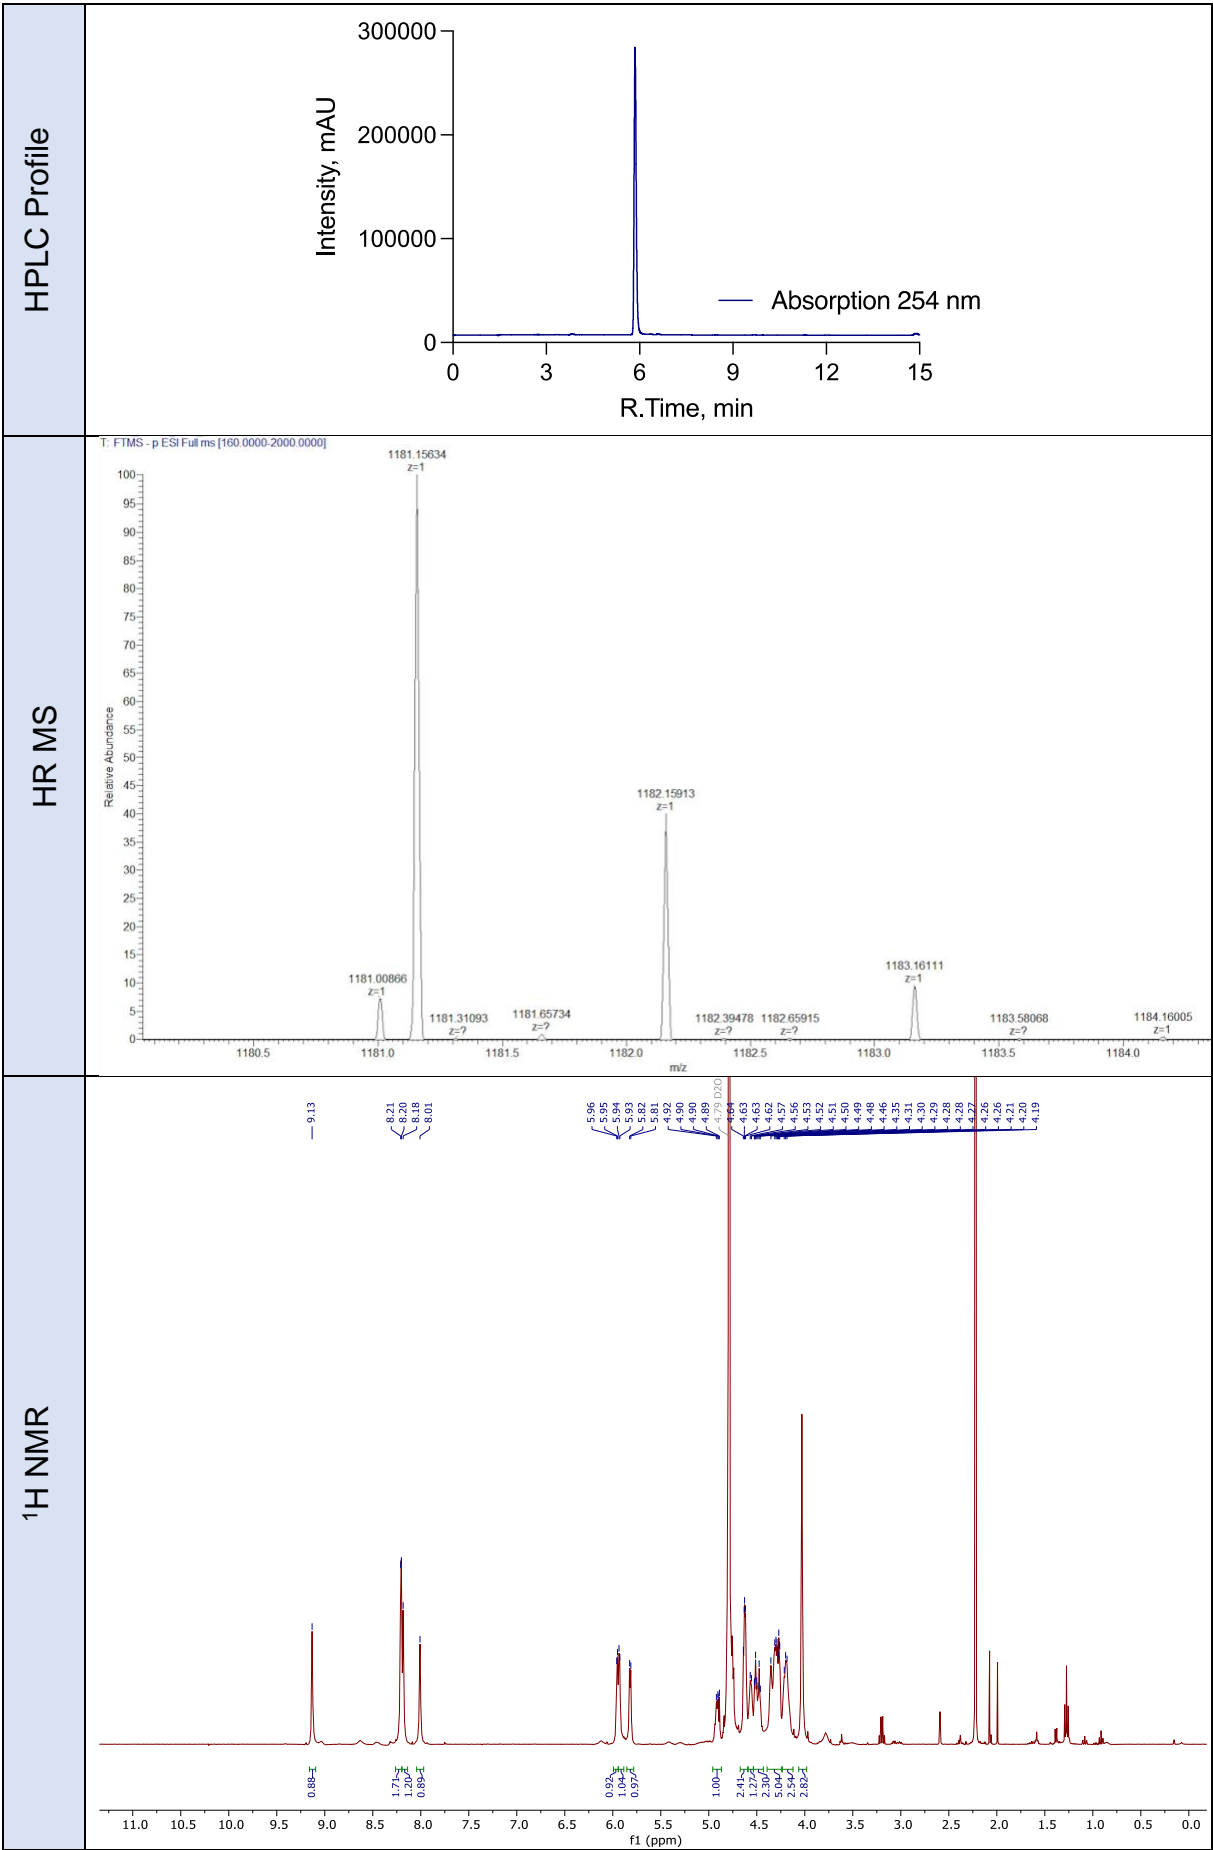

<sup>31</sup>P NMR

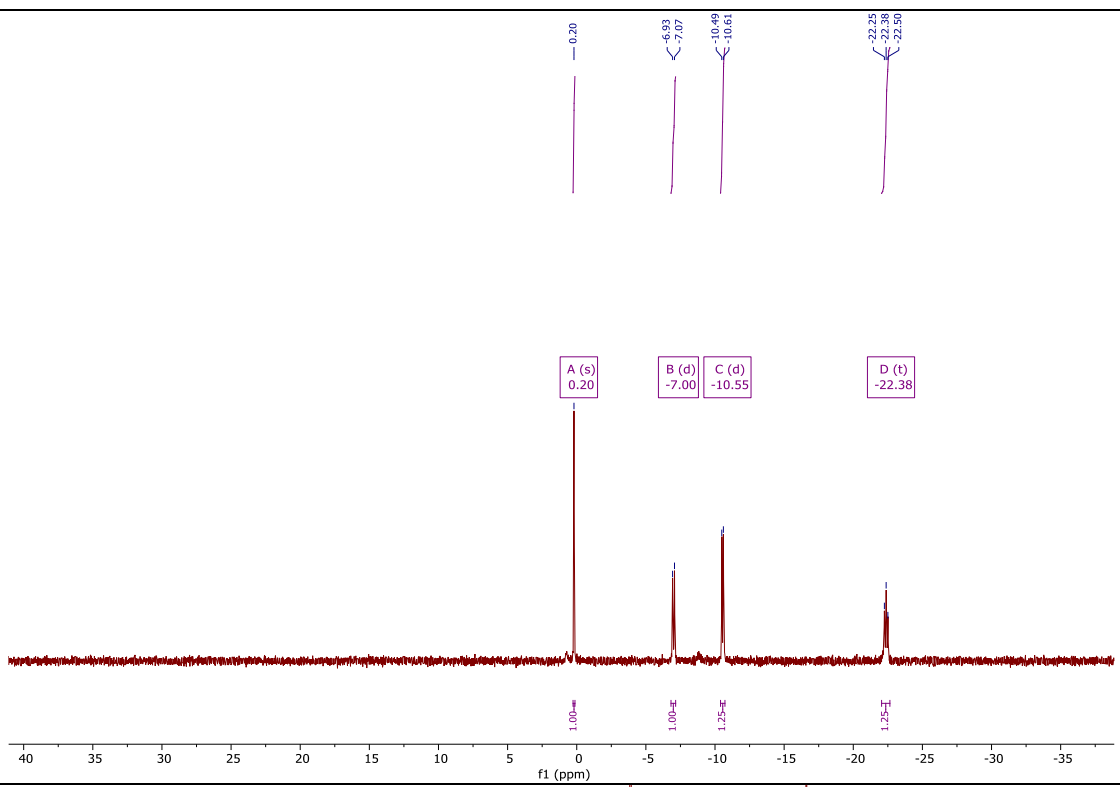

<sup>1</sup>H-<sup>1</sup>H COSY NMR

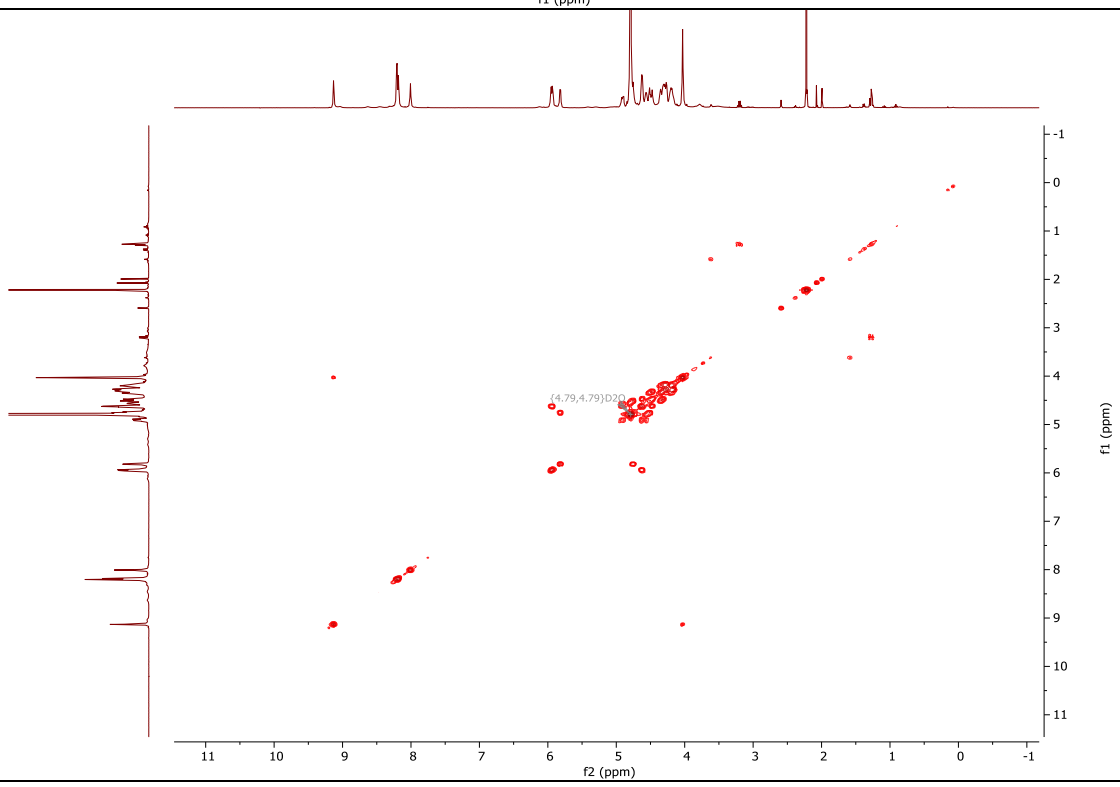

# m<sup>7</sup>Gppp-tr-AmpG 2

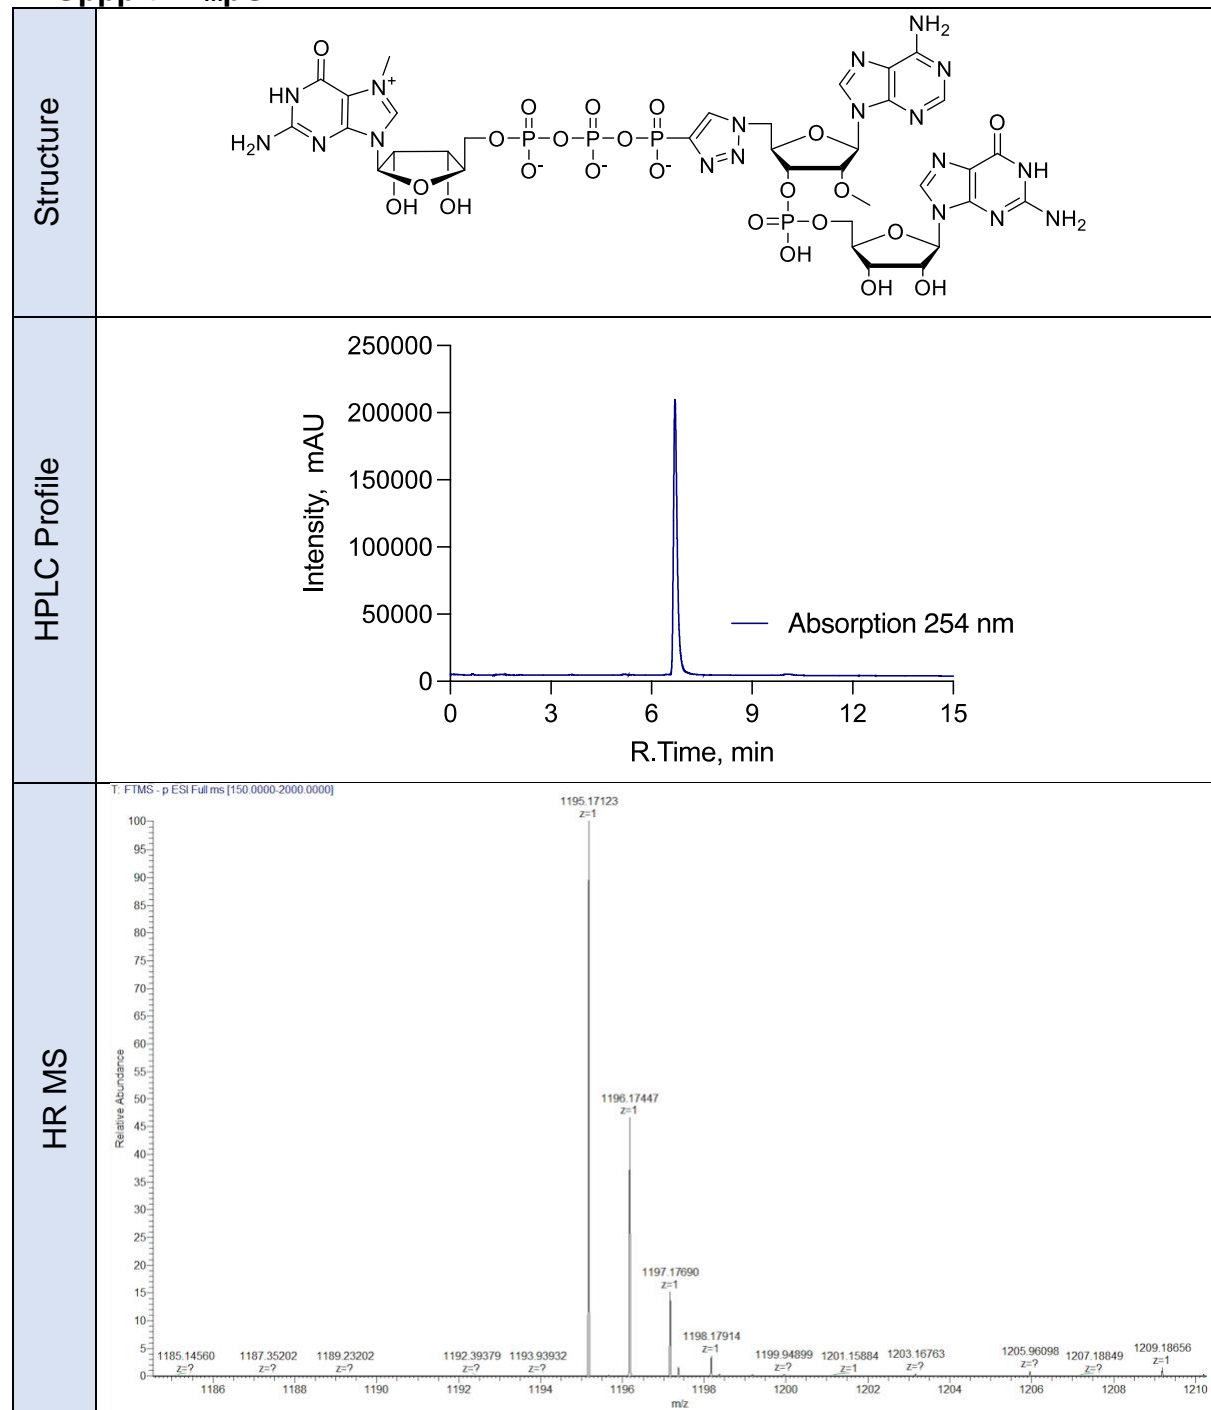

<sup>1</sup>H NMR

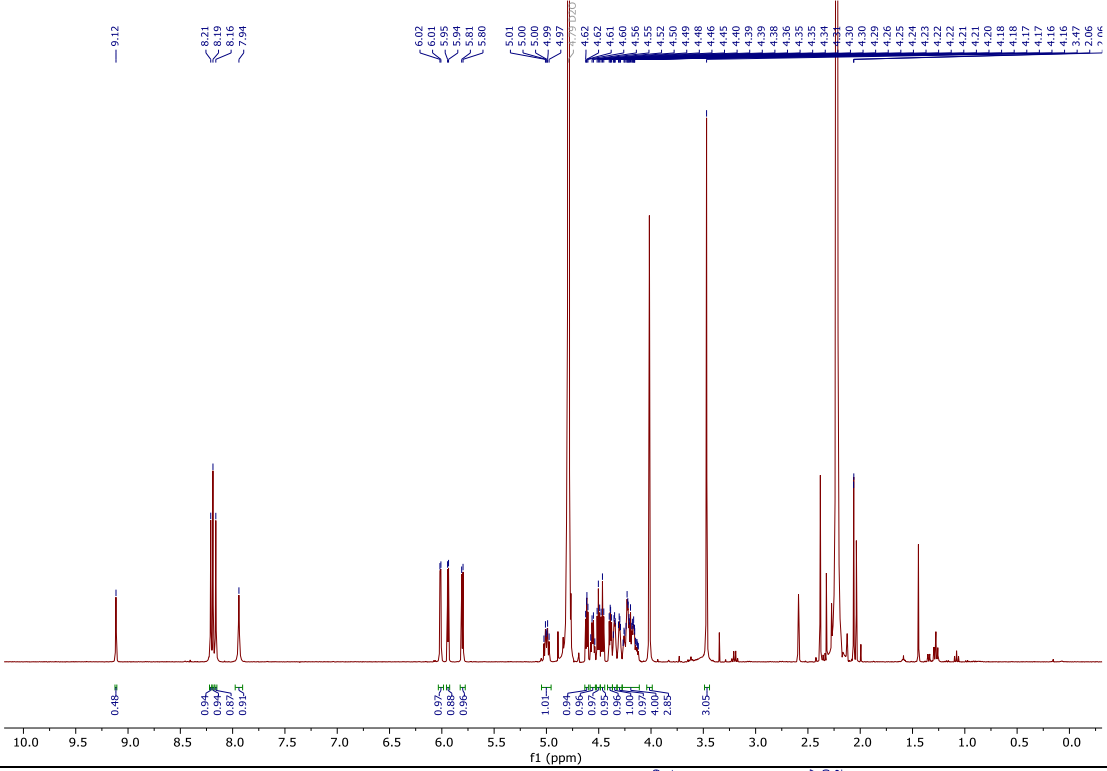

<sup>31</sup>P NMR

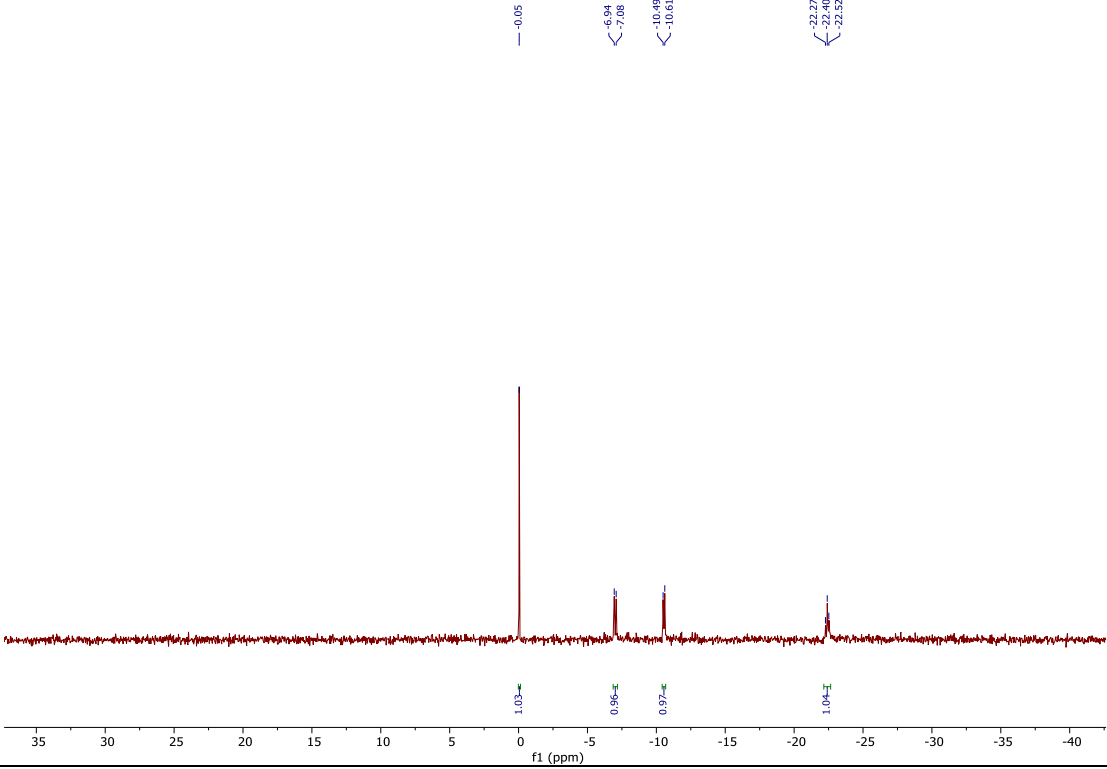



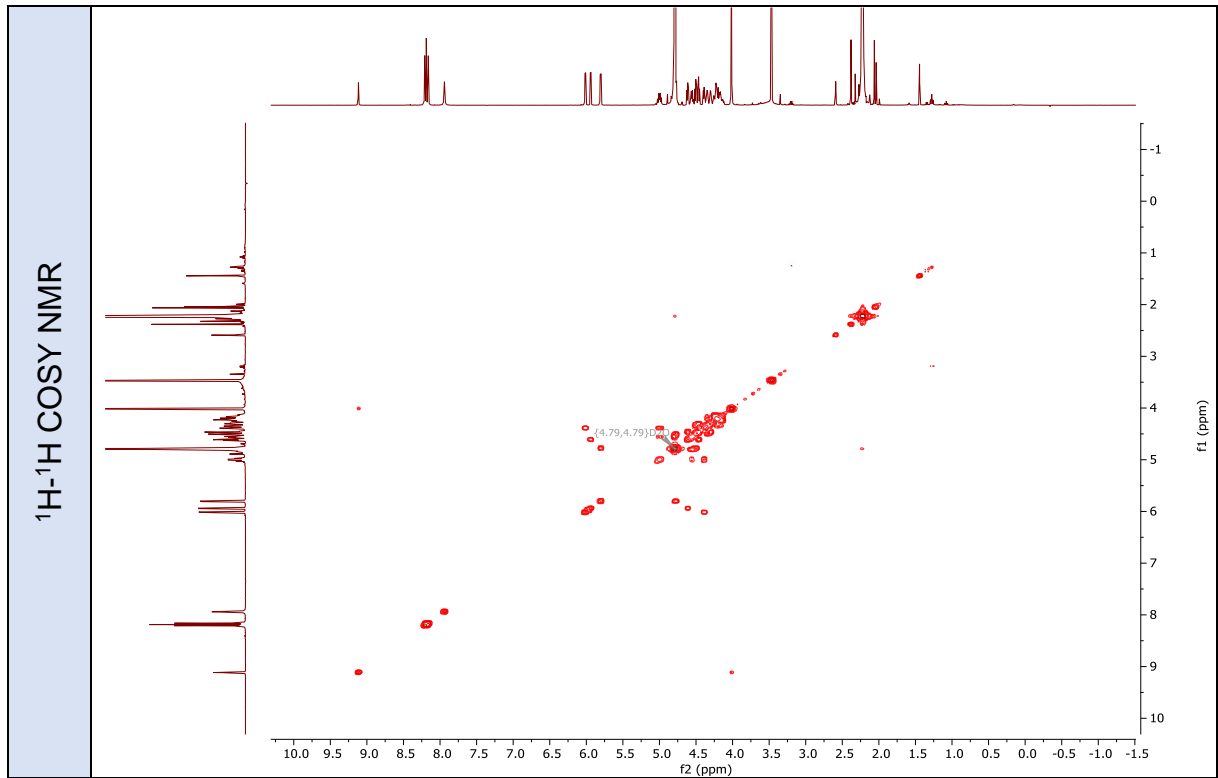

**m<sup>7</sup>Gppp-CH<sub>2</sub>-tr-ApG 3**

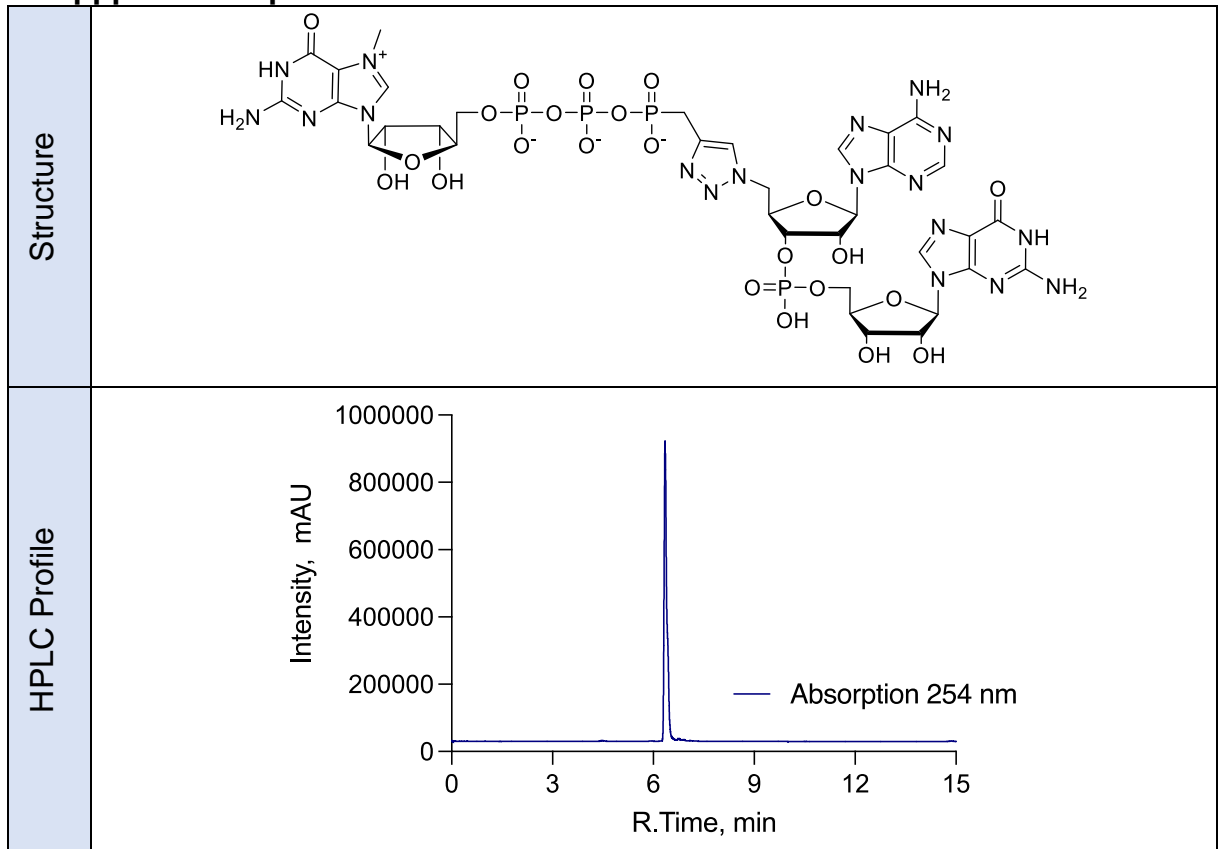



<sup>31</sup>P NMR

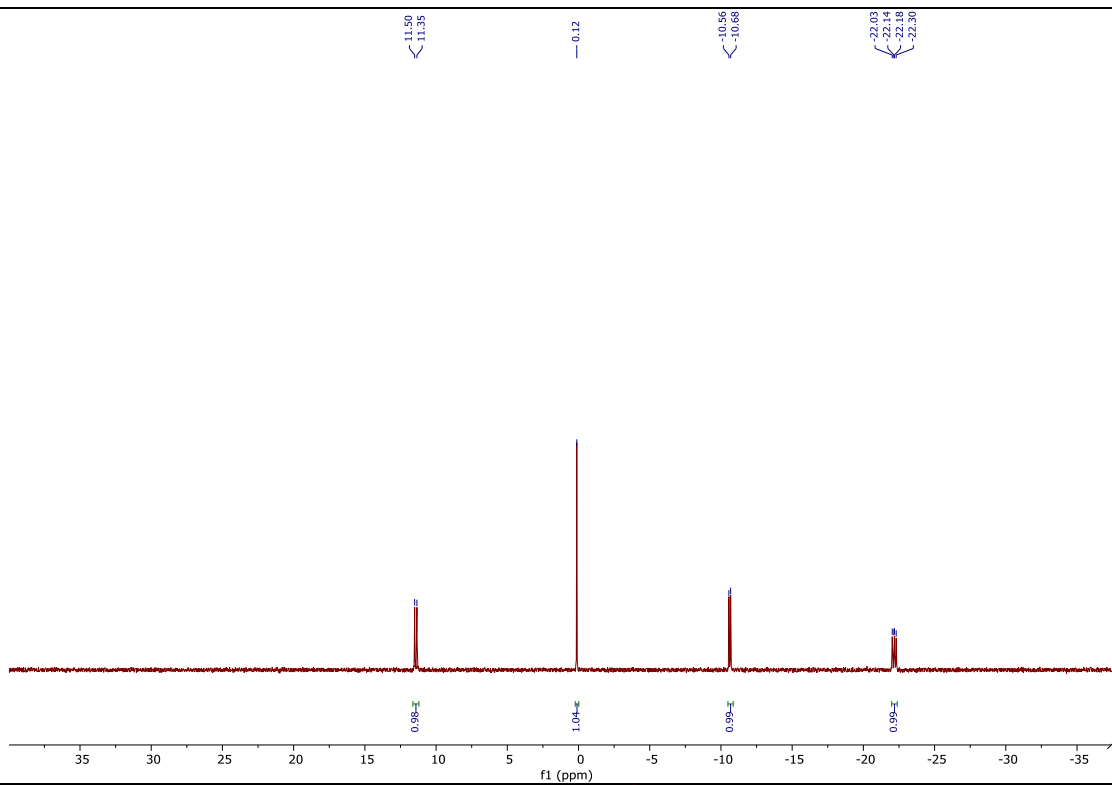

<sup>1</sup>H-<sup>1</sup>H COSY NMR

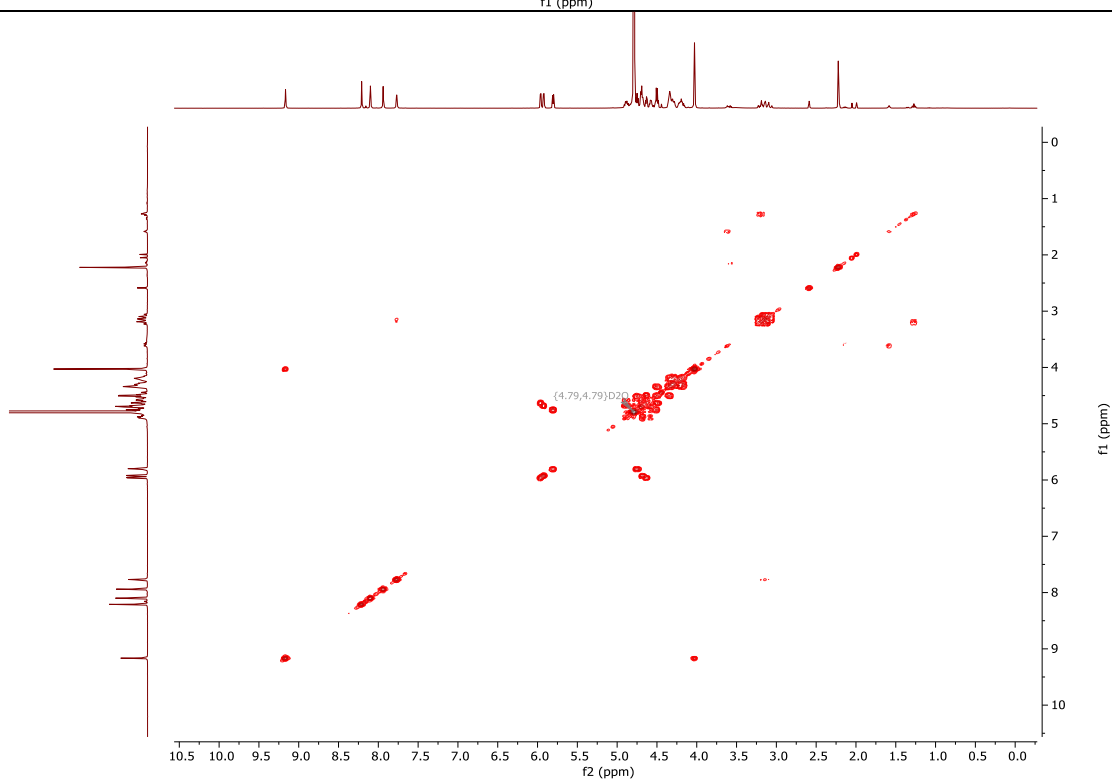

# m<sup>7</sup>Gppp-CH<sub>2</sub>-tr-AmpG 4

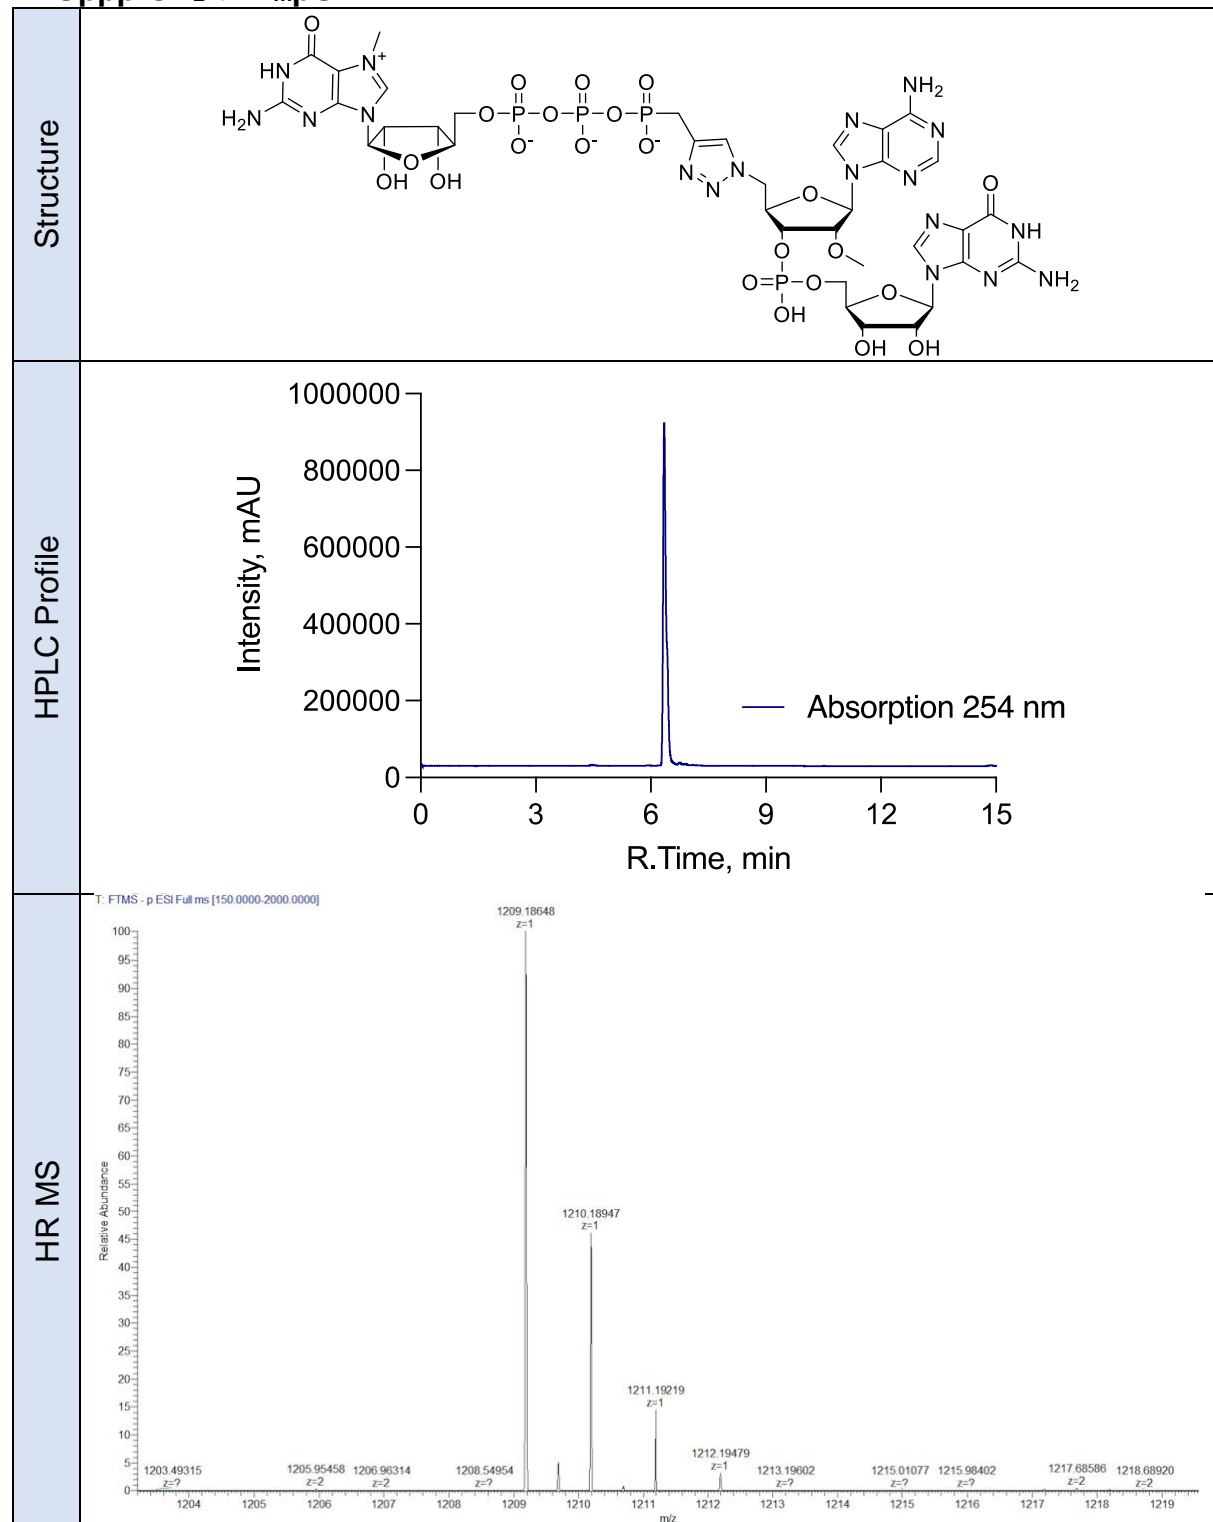

# <sup>1</sup>H NMR

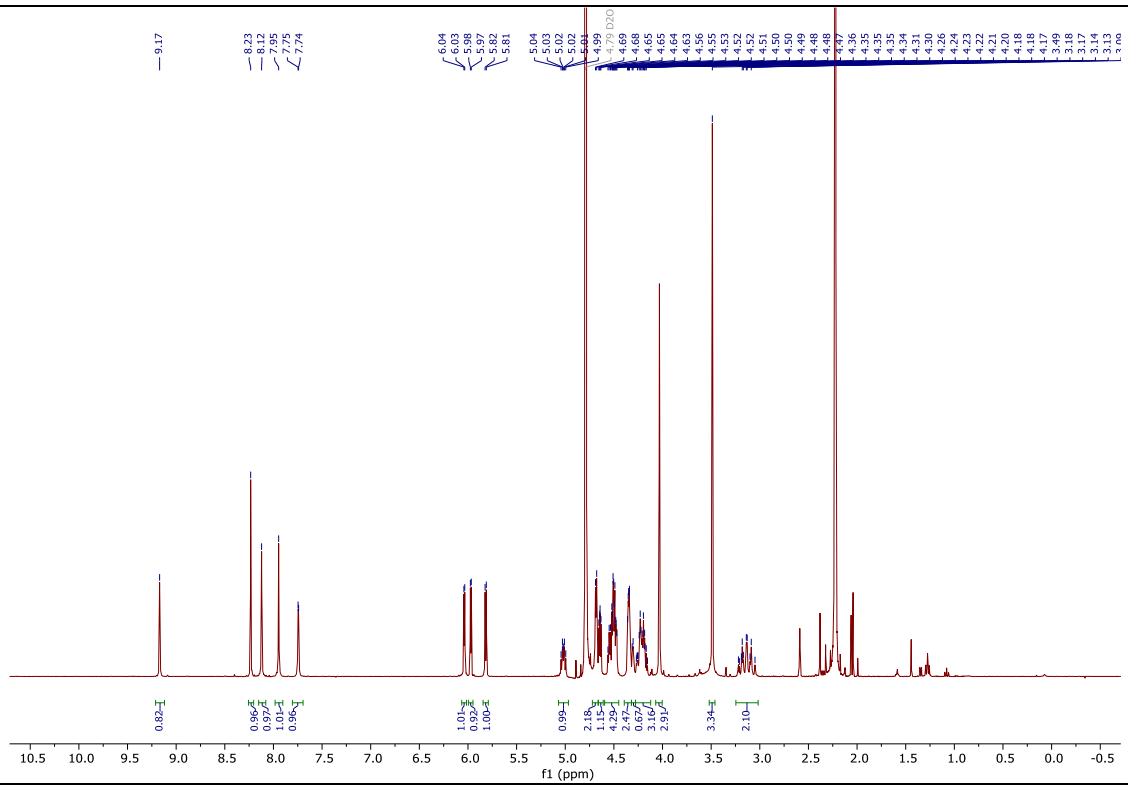

# <sup>31</sup>P NMR

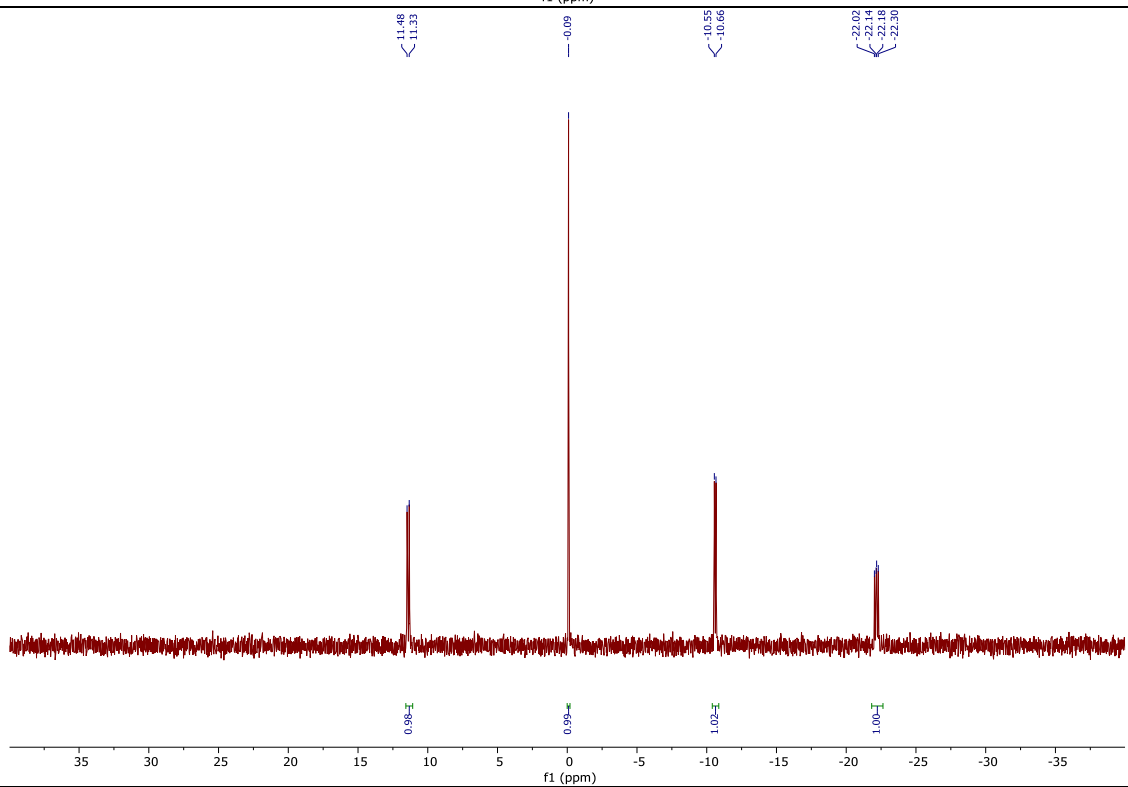

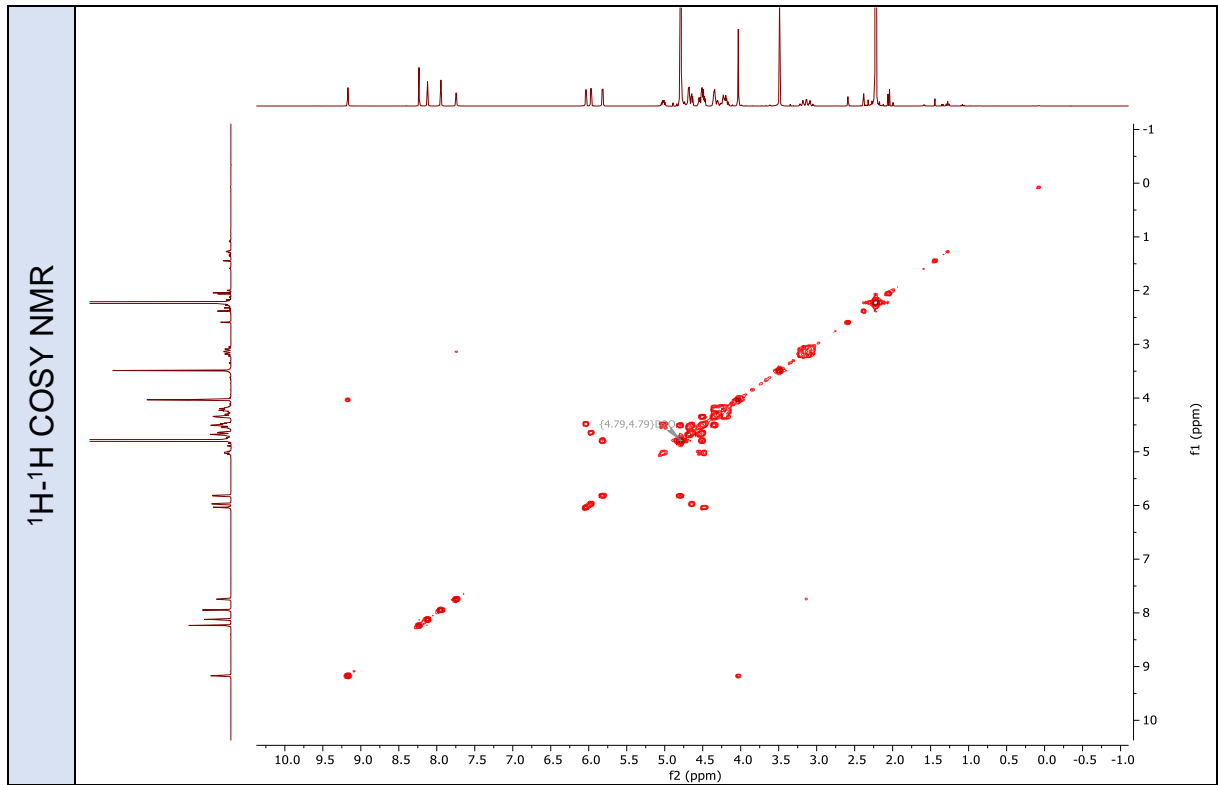

**m<sup>7</sup>Gppp-C<sub>2</sub>H<sub>4</sub>-ApG 5**

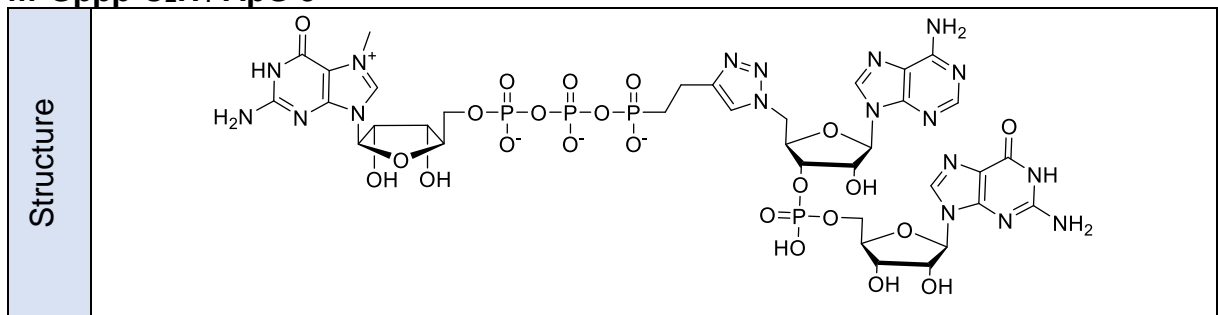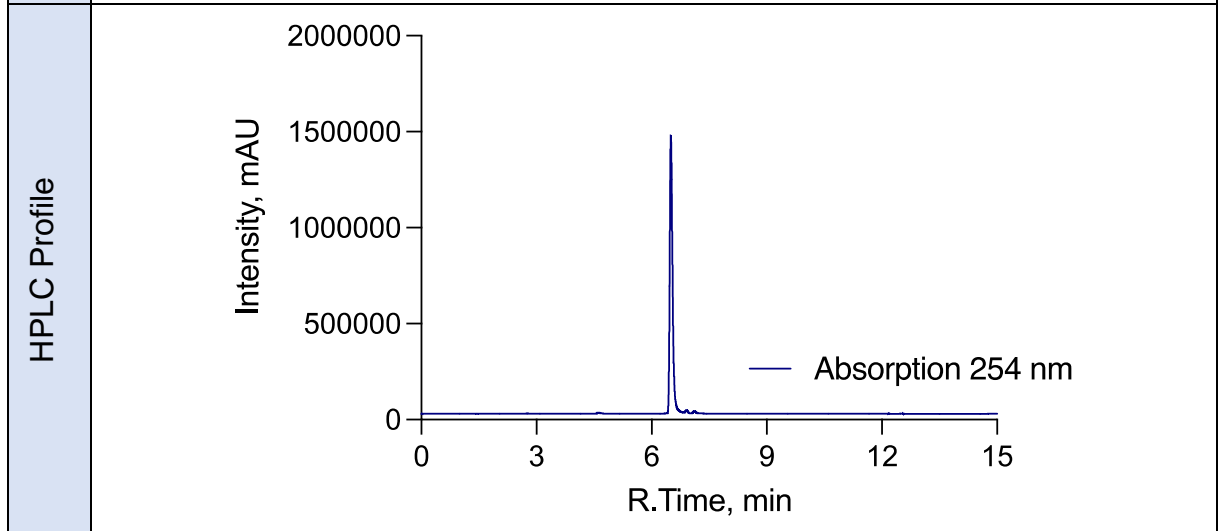



<sup>31</sup>P NMR

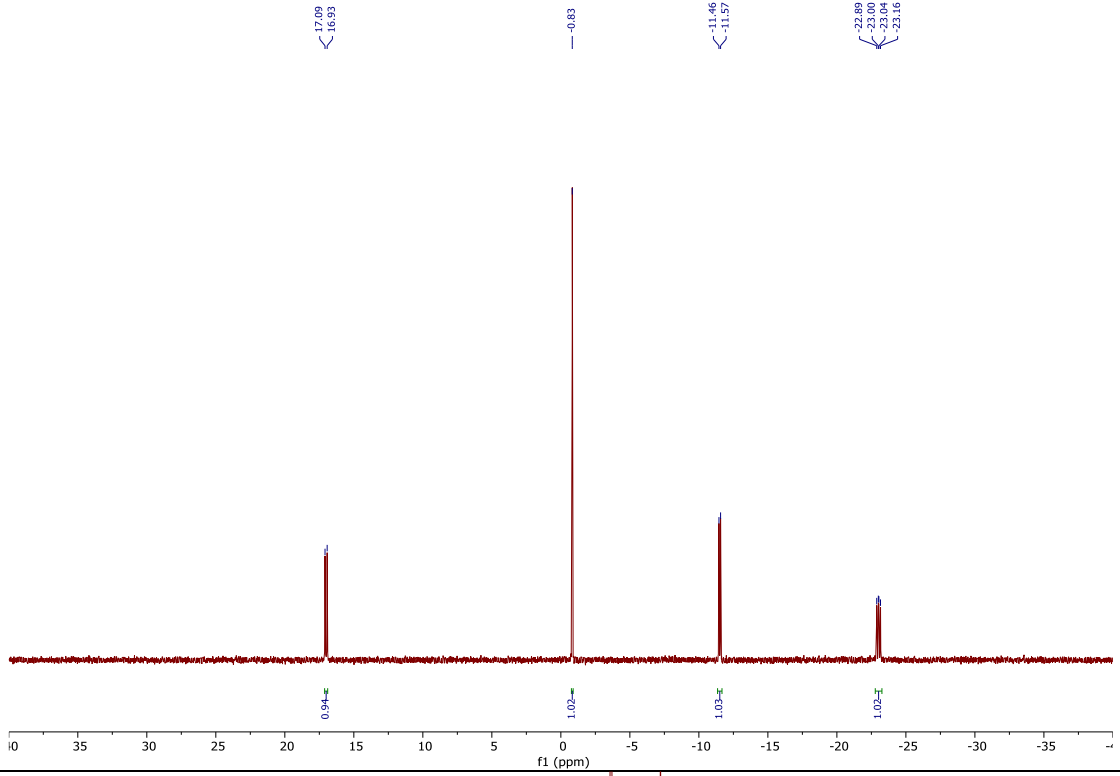

<sup>1</sup>H-<sup>1</sup>H COSY NMR

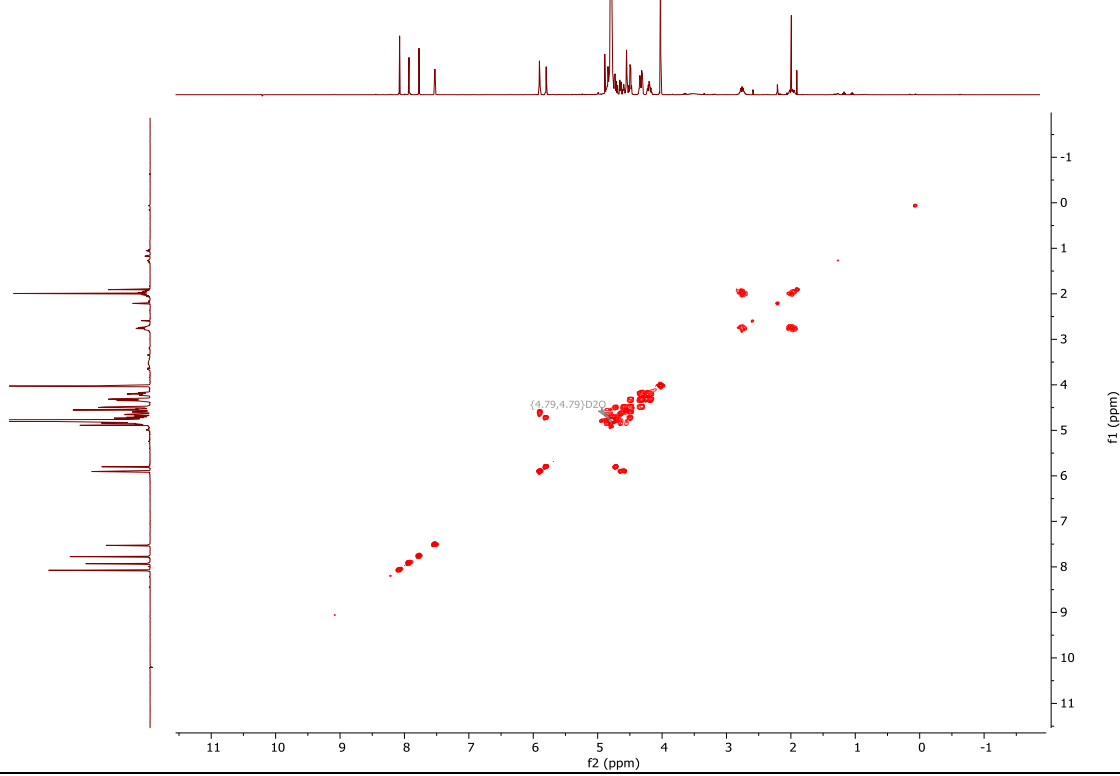



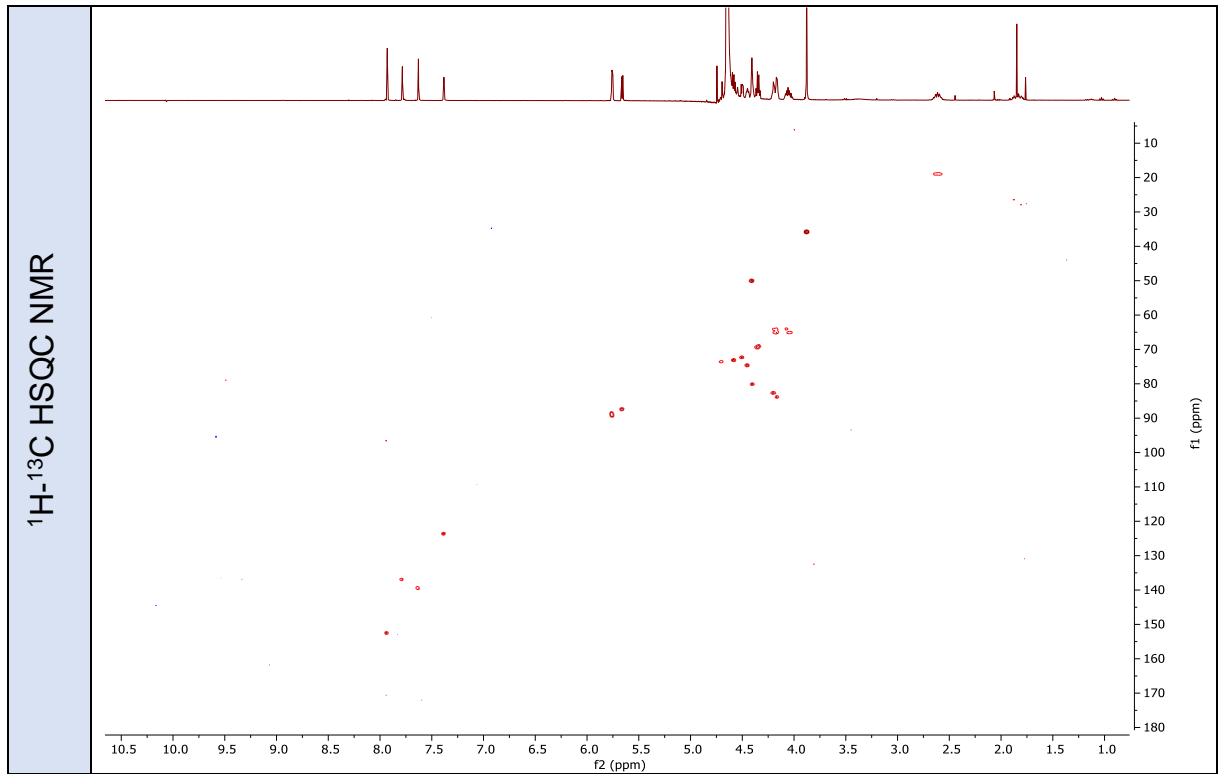

**$\text{m}^7\text{Gppp-C}_2\text{H}_4\text{-AmpG 6}$**

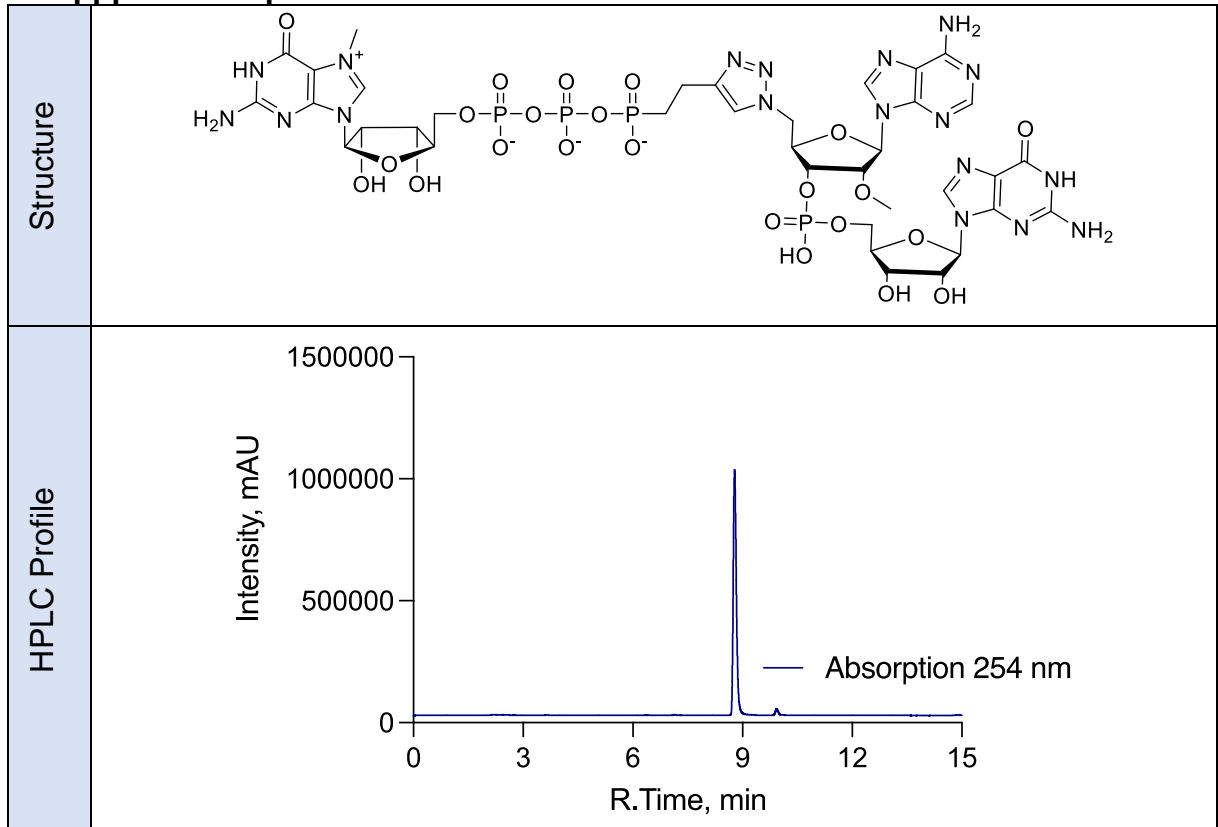

# HR MS

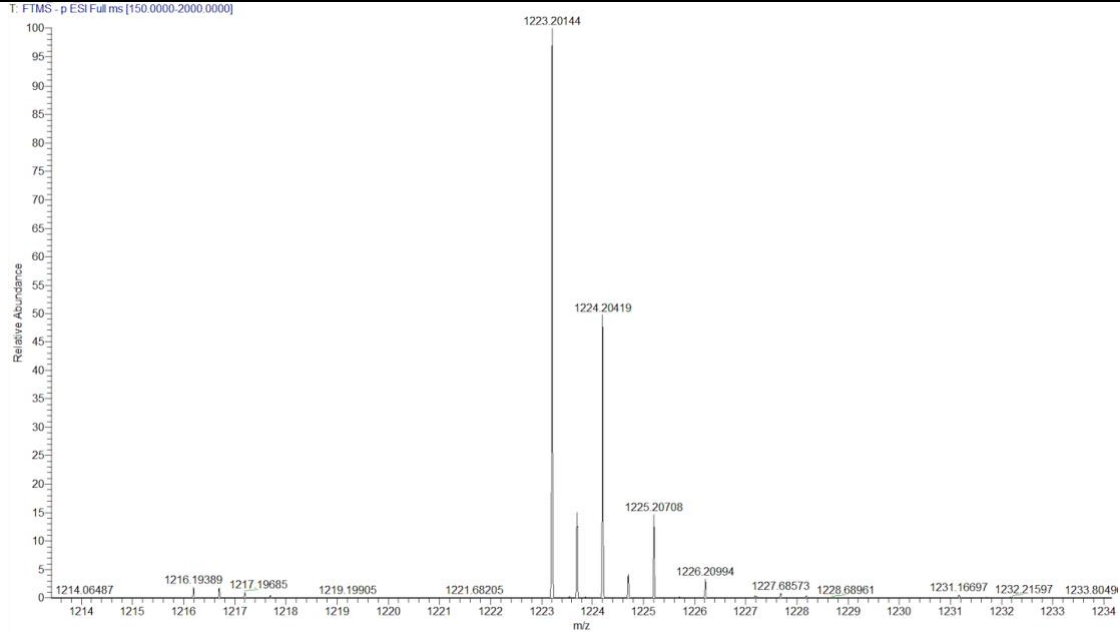

# <sup>1</sup>H NMR

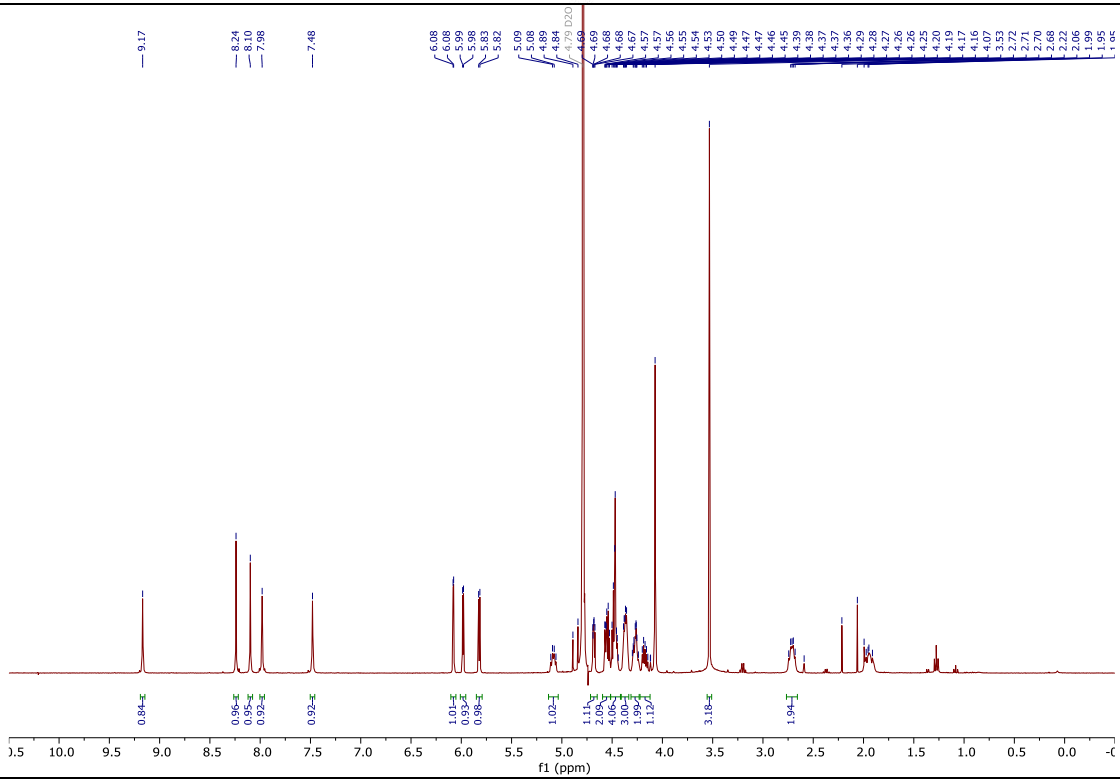

<sup>31</sup>P NMR

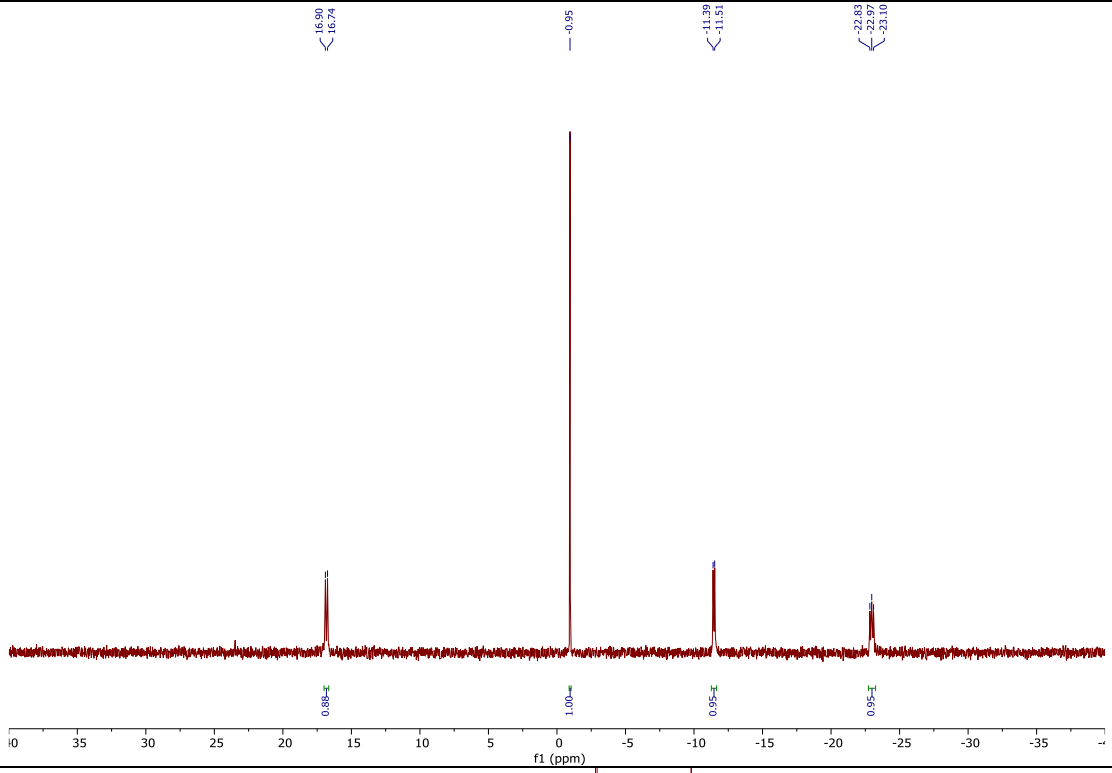

<sup>1</sup>H-<sup>1</sup>H COSY NMR

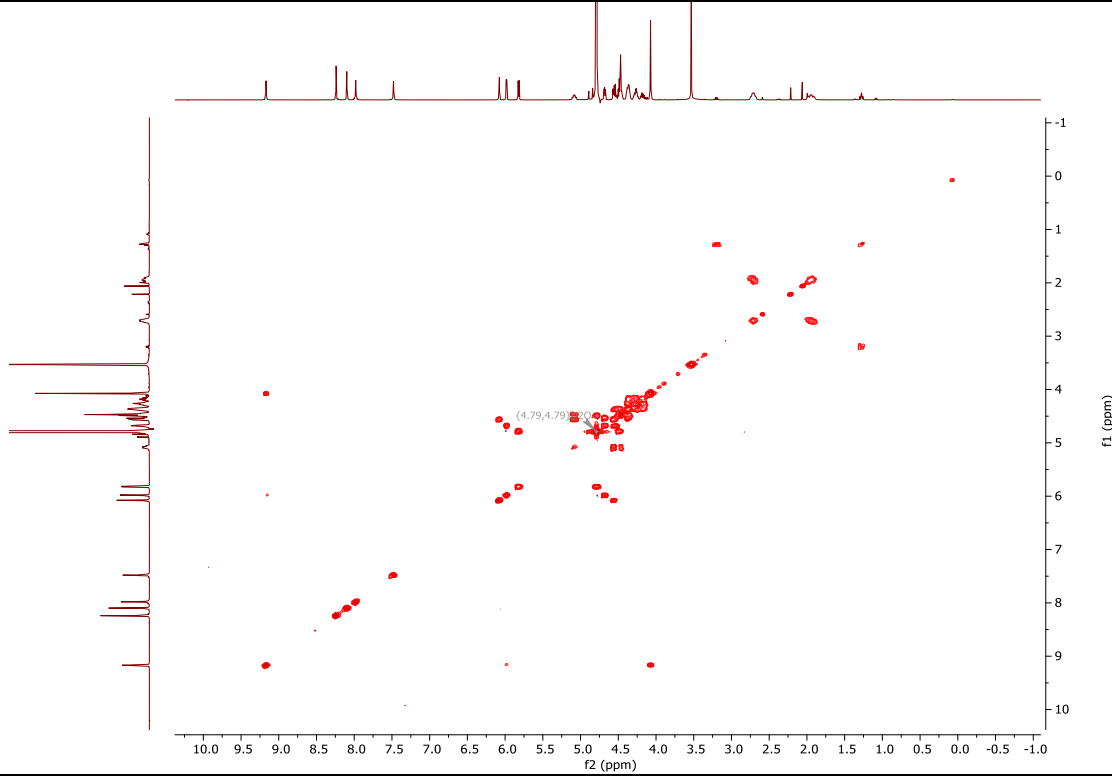

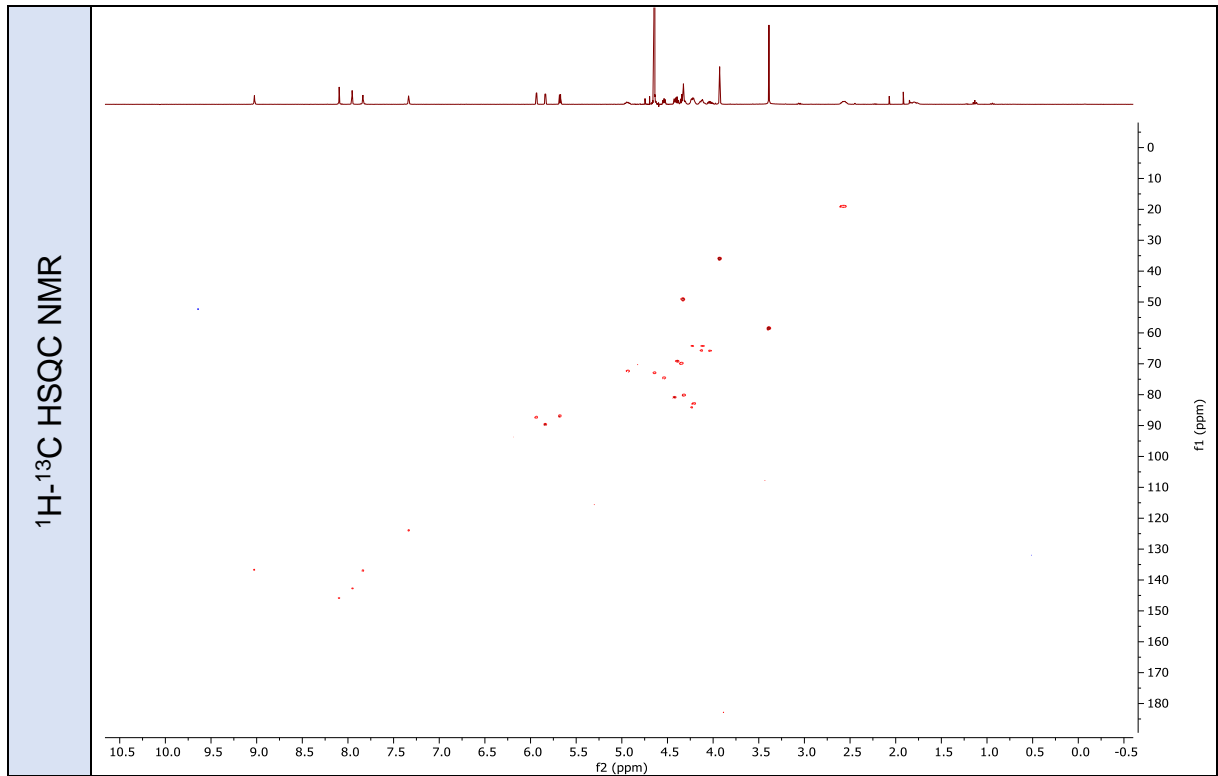

**$\text{m}^7\text{GpppOCH}_2\text{-tr-ApG 7}$**

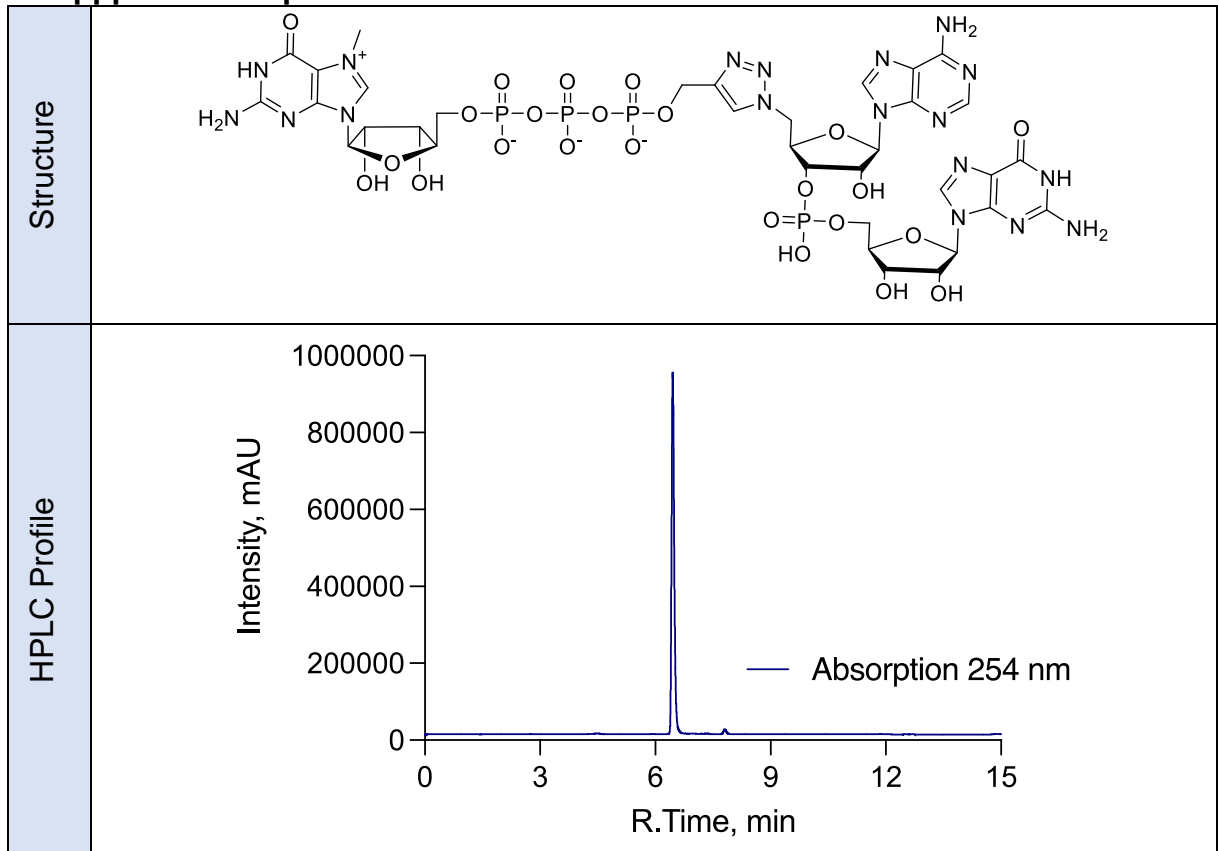

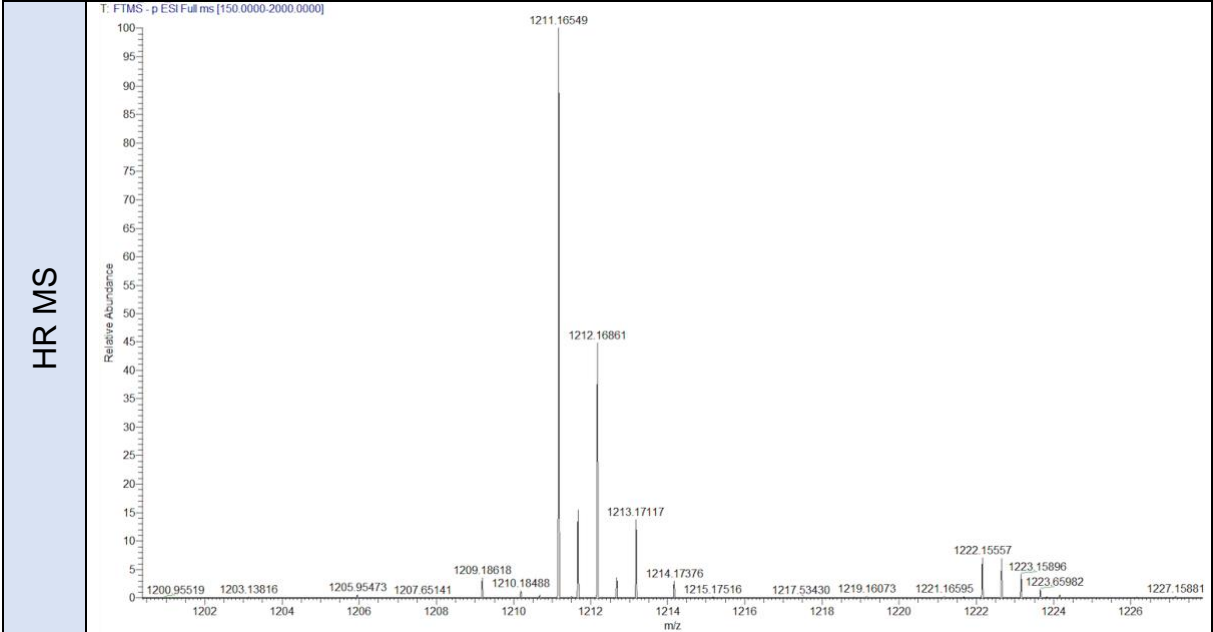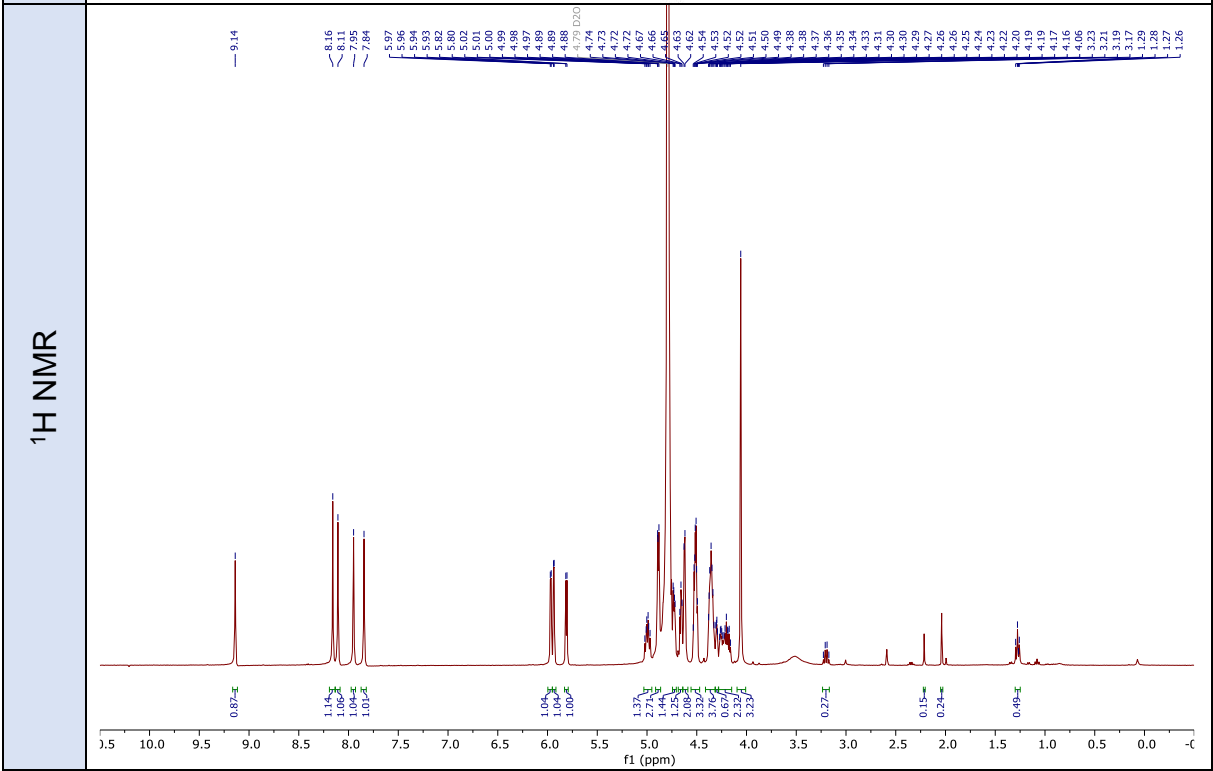

<sup>31</sup>P NMR

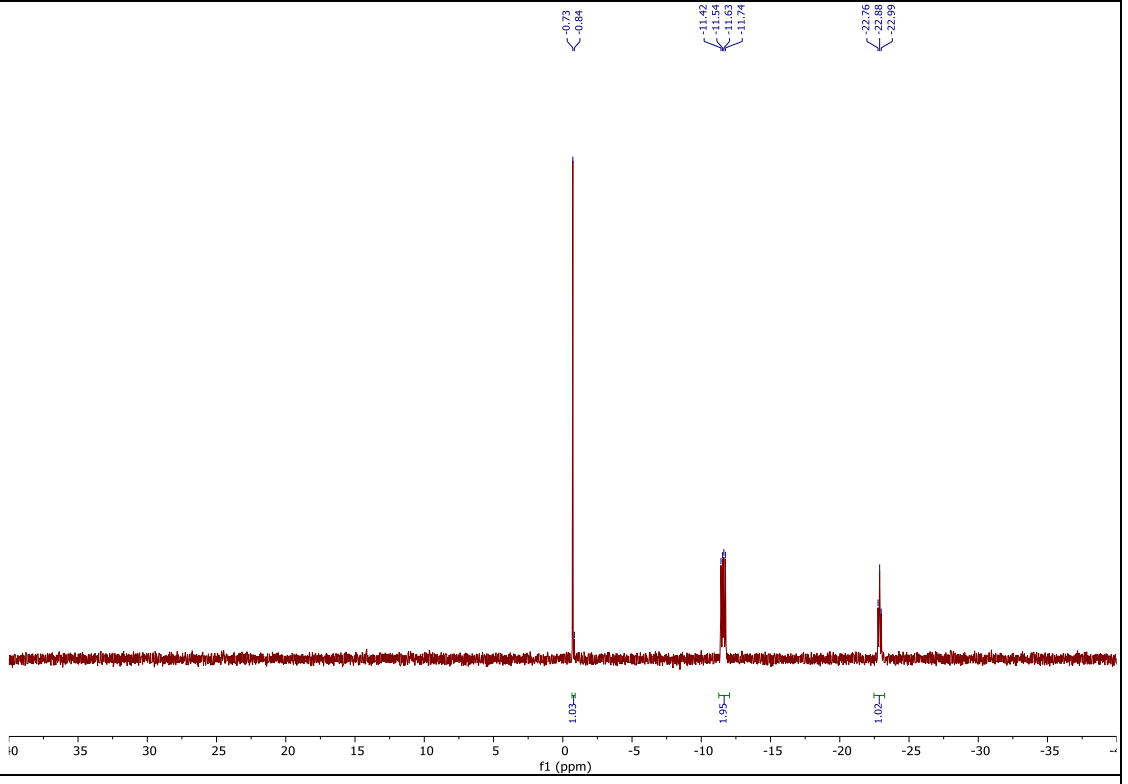

<sup>1</sup>H-<sup>1</sup>H COSY NMR

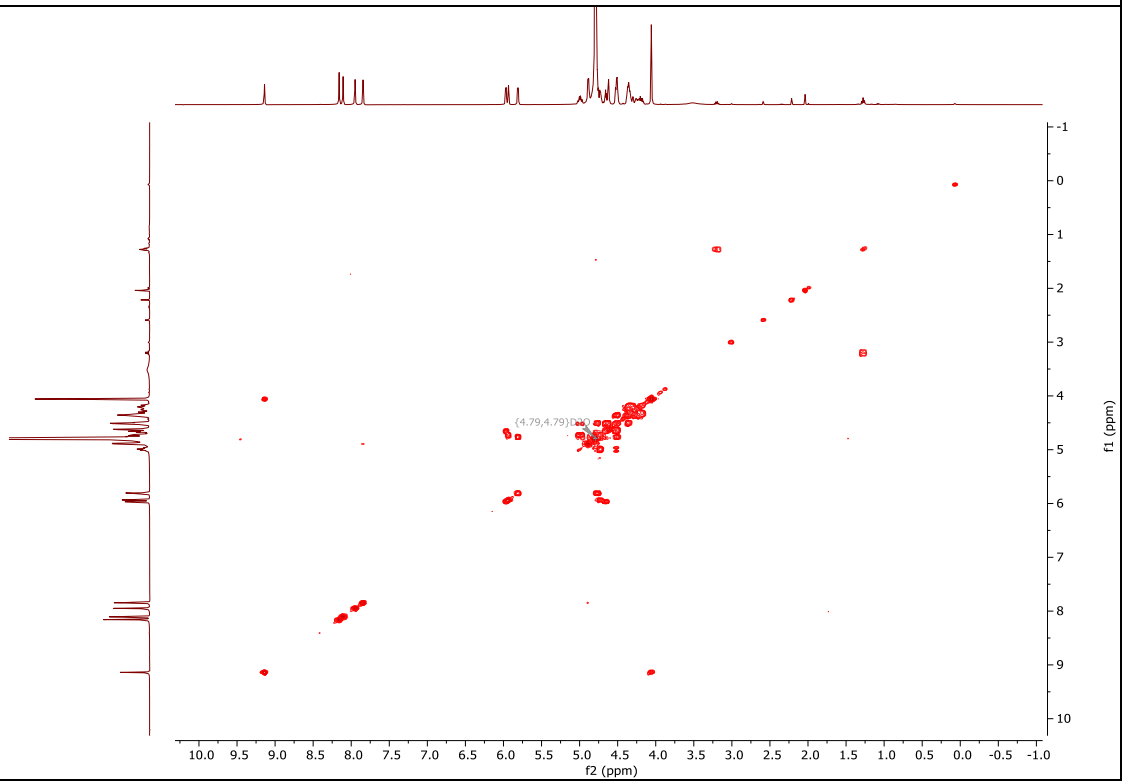

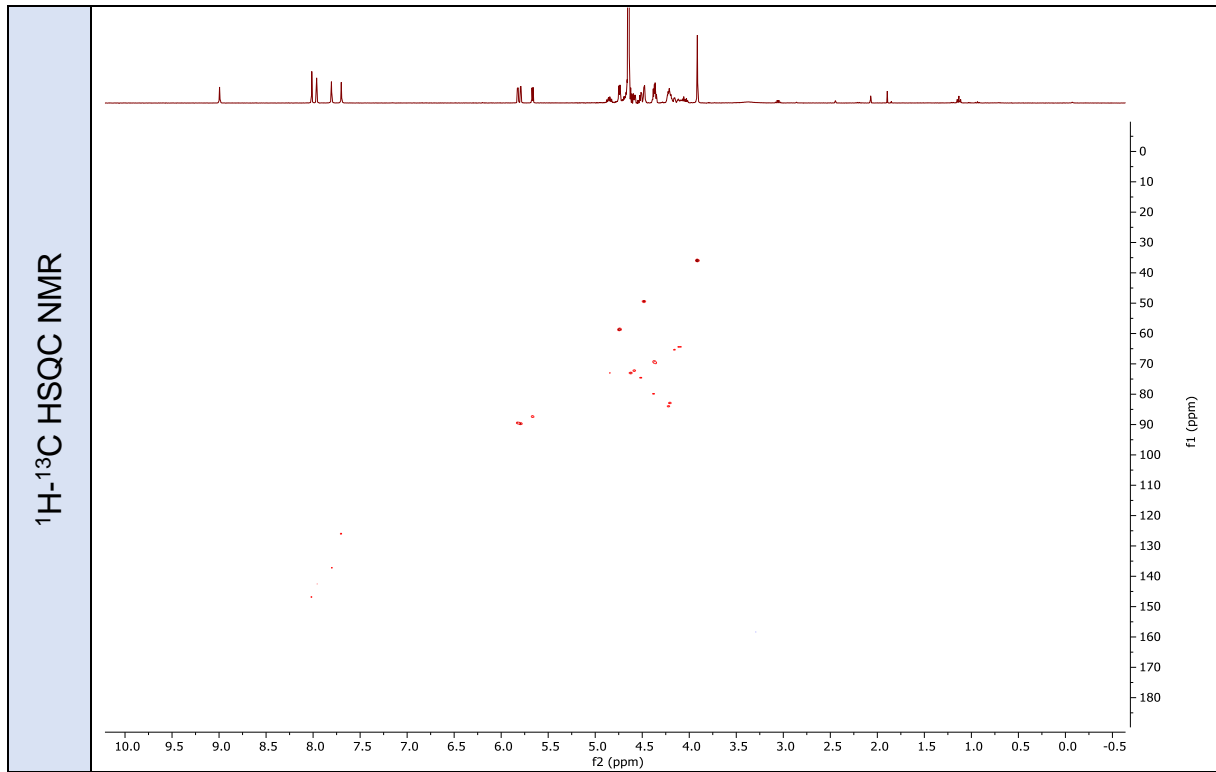

**$m^7\text{GpppOCH}_2\text{-tr-AmpG 8}$**

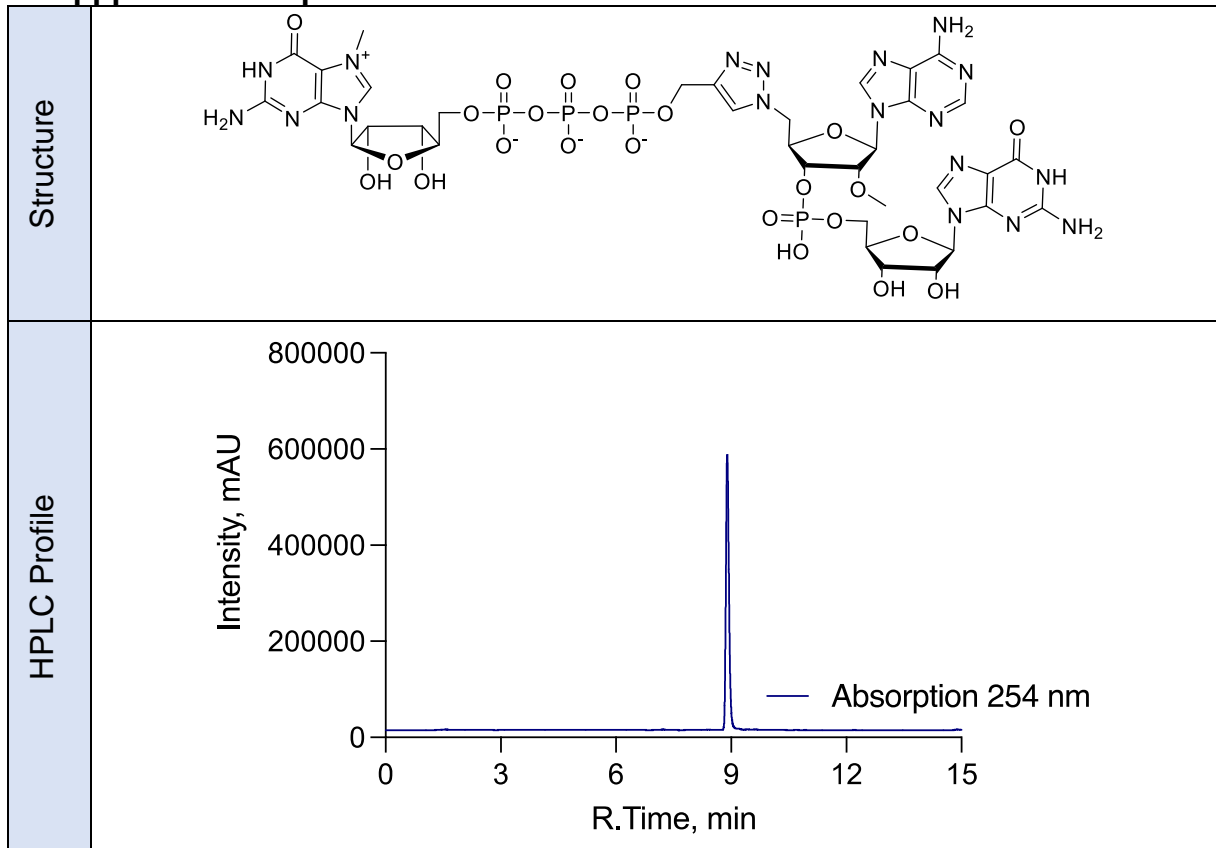

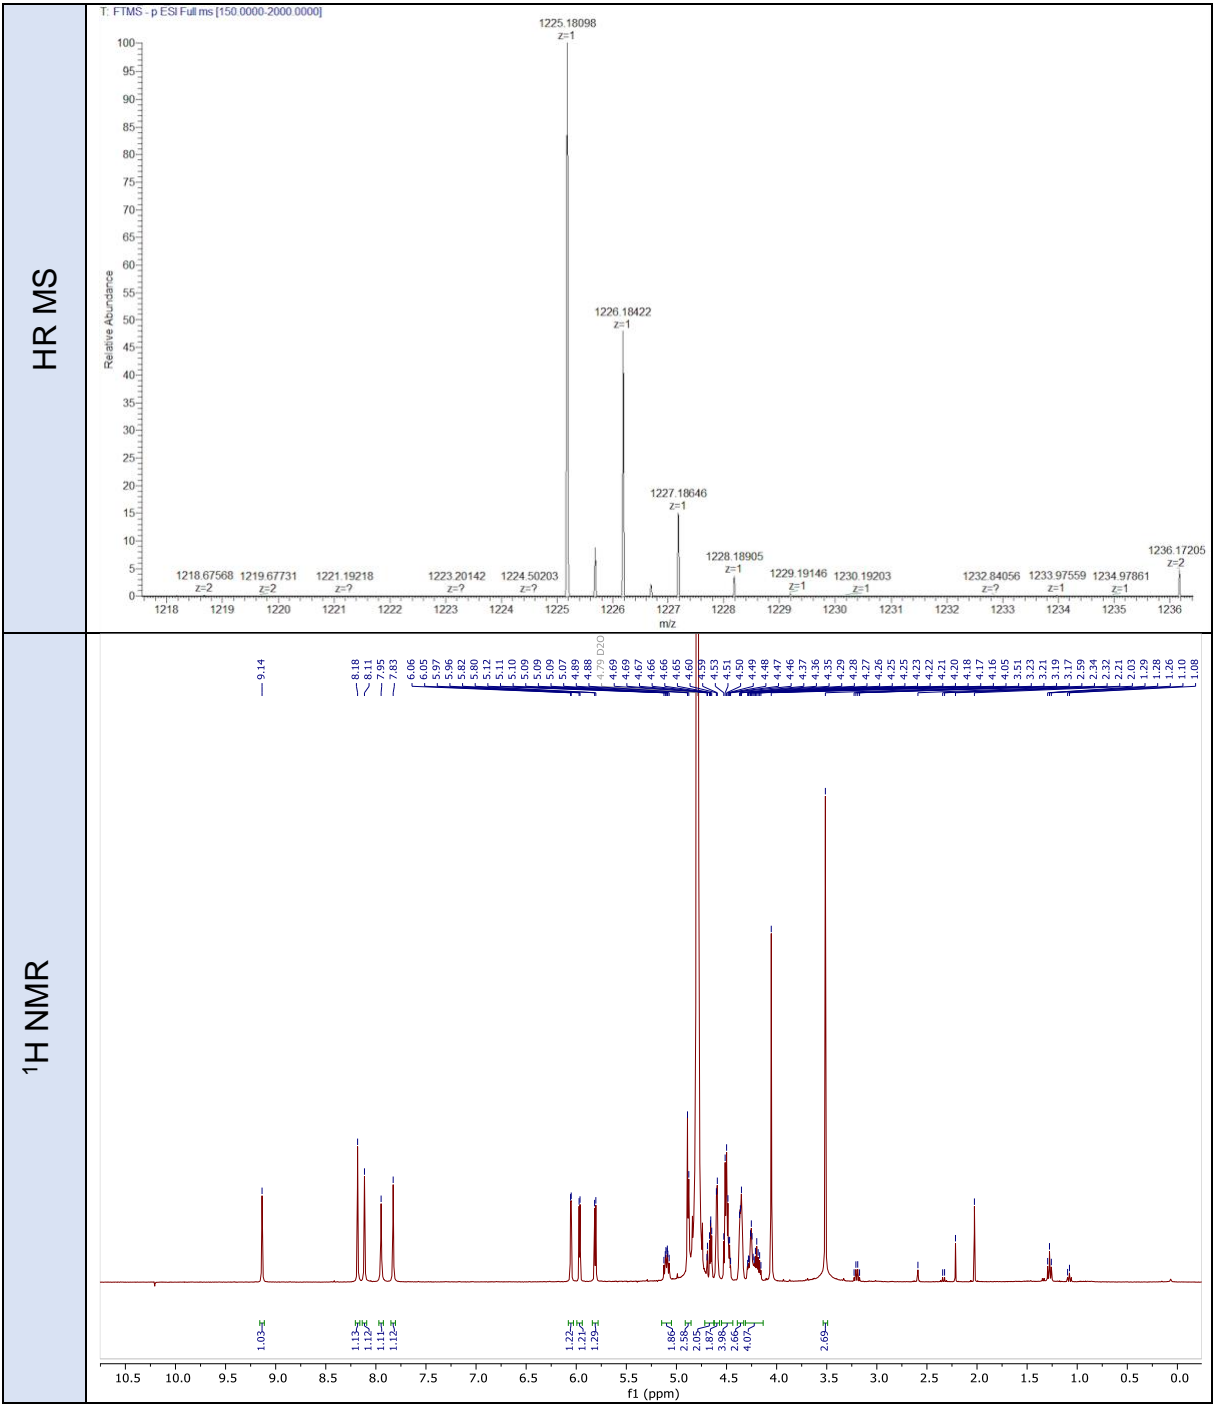



<sup>31</sup>P NMR

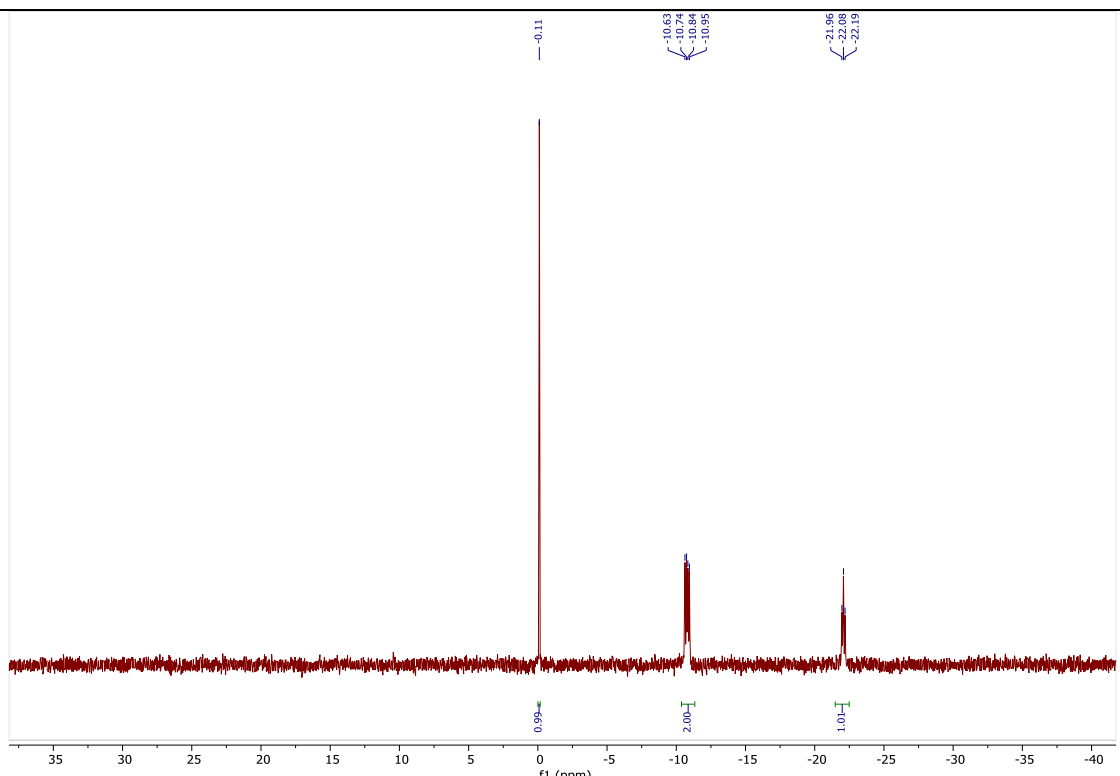

<sup>1</sup>H-<sup>1</sup>H COSY NMR

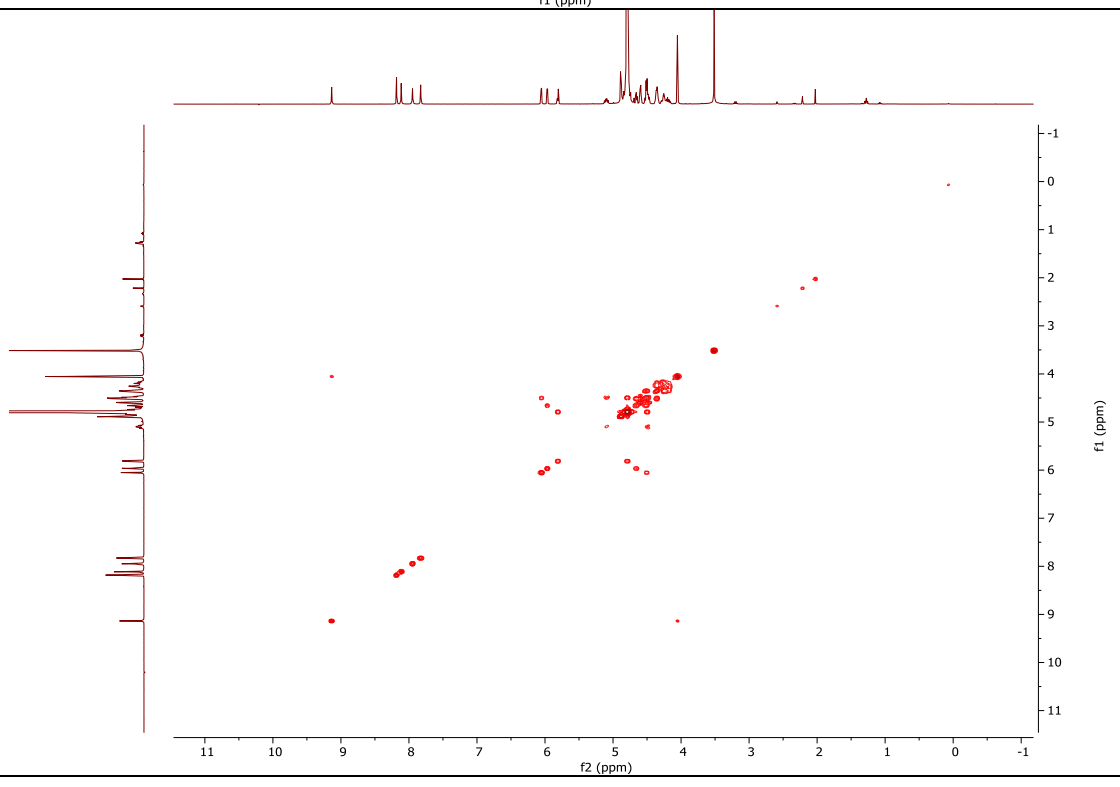

# m<sup>7</sup>Gppp-tr-C<sub>2</sub>H<sub>4</sub>pAmpG 9

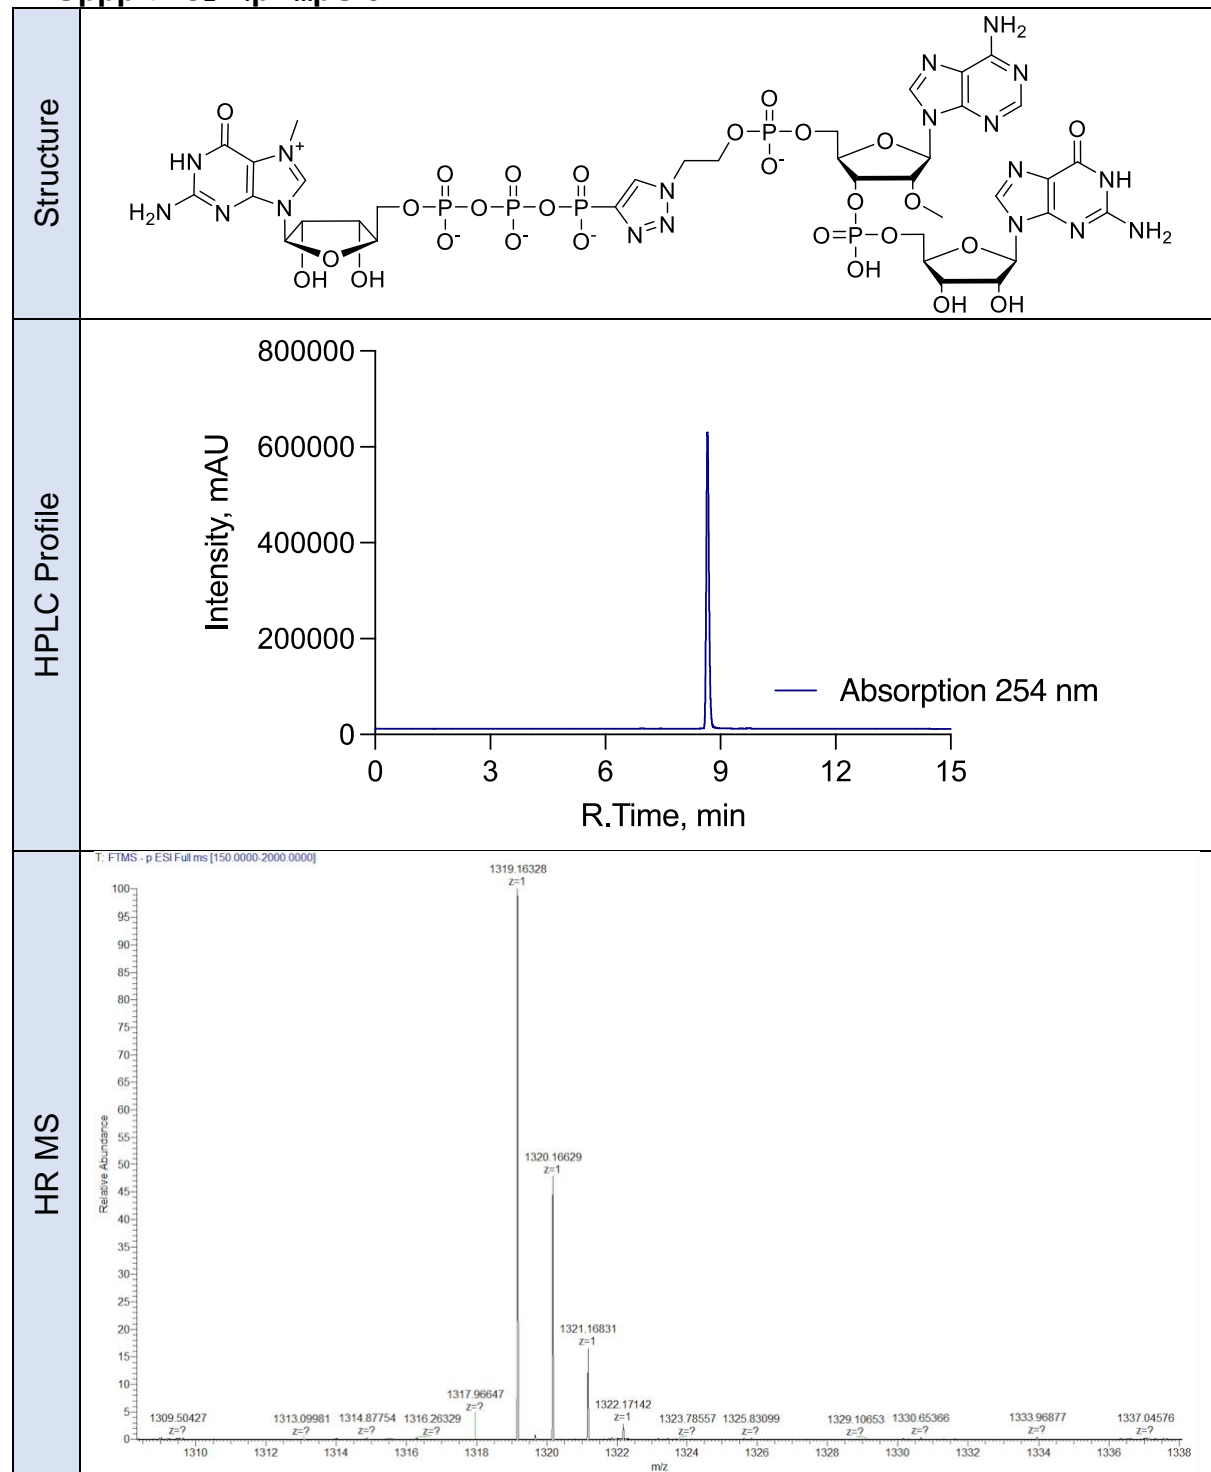

<sup>1</sup>H NMR

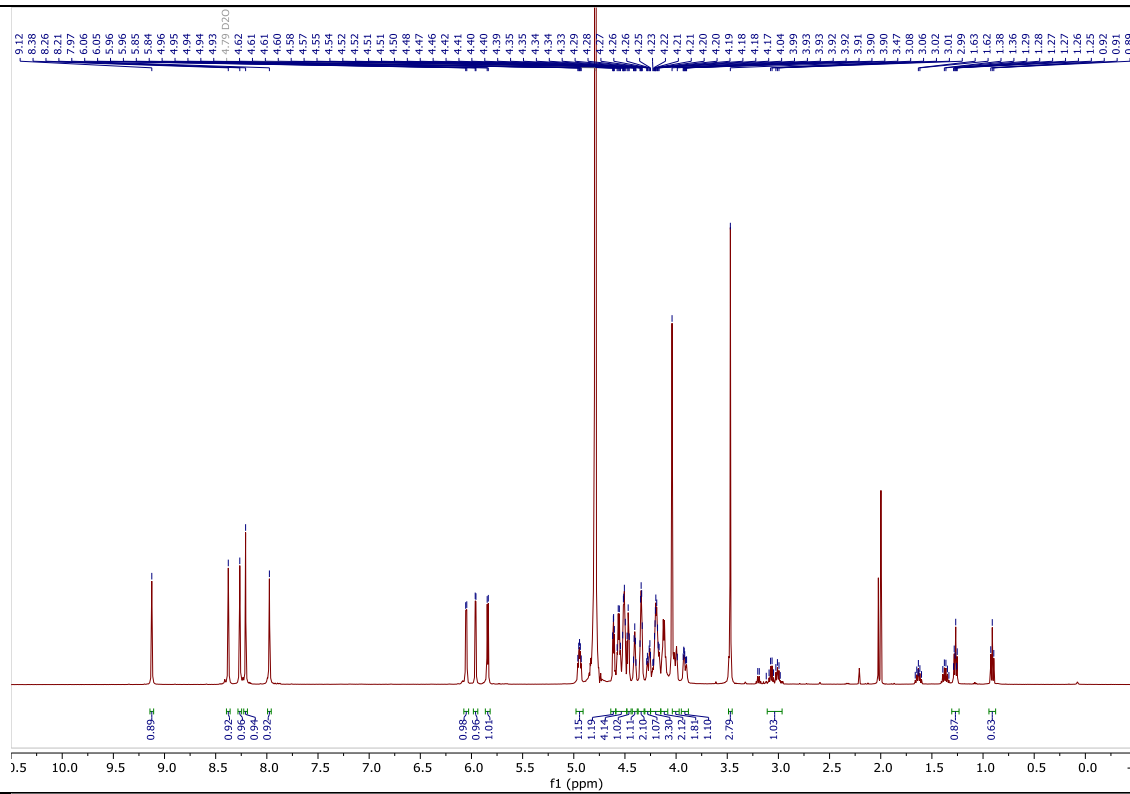

<sup>31</sup>P NMR

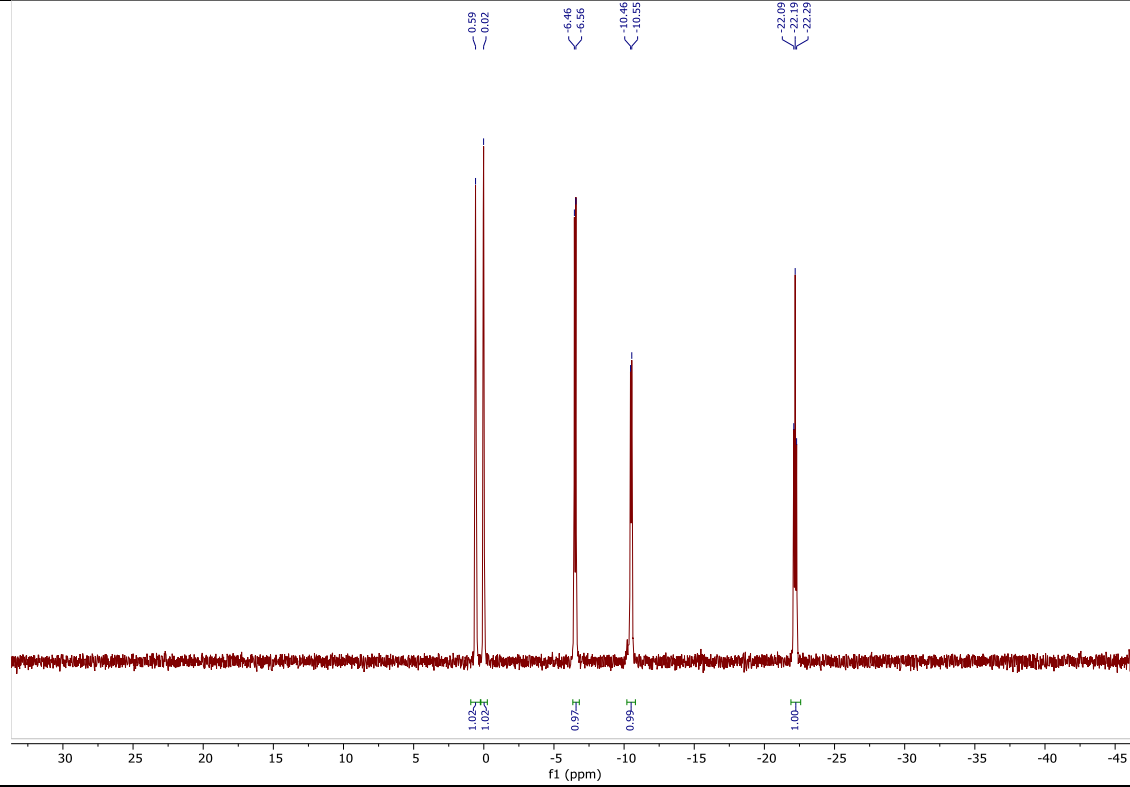

<sup>1</sup>H-<sup>1</sup>H COSY NMR

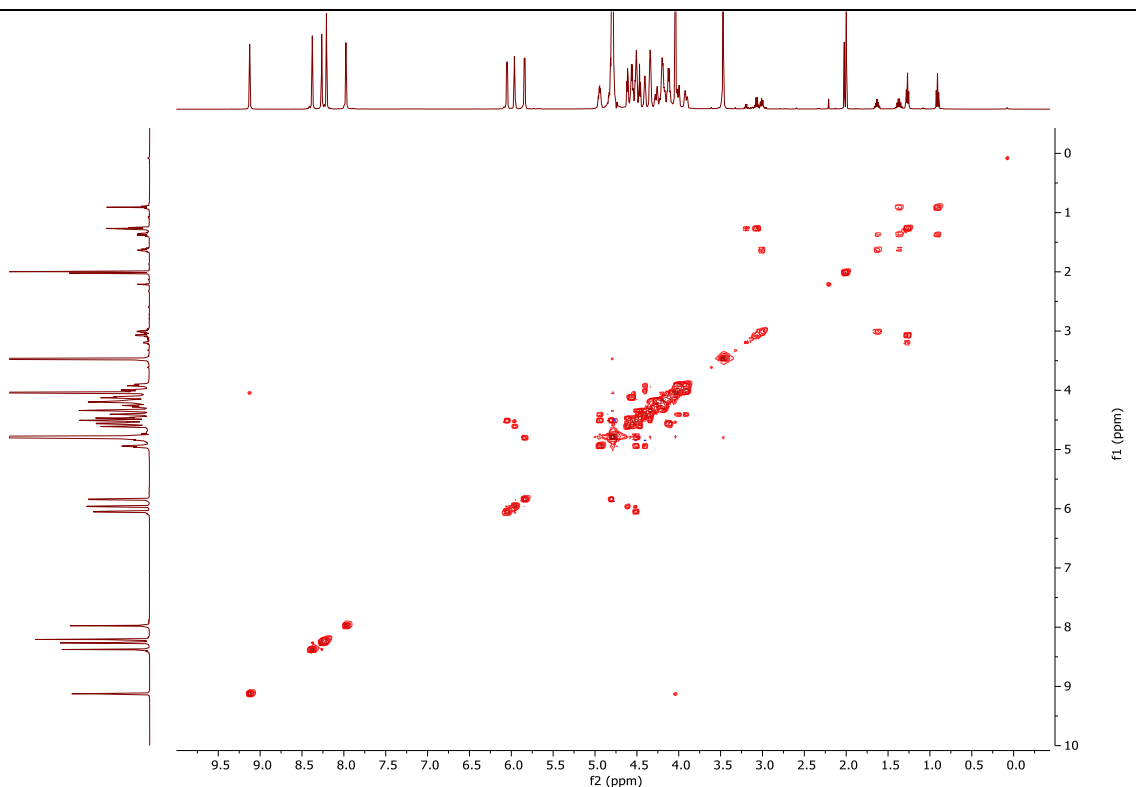

<sup>13</sup>C-<sup>1</sup>H HSQC NMR

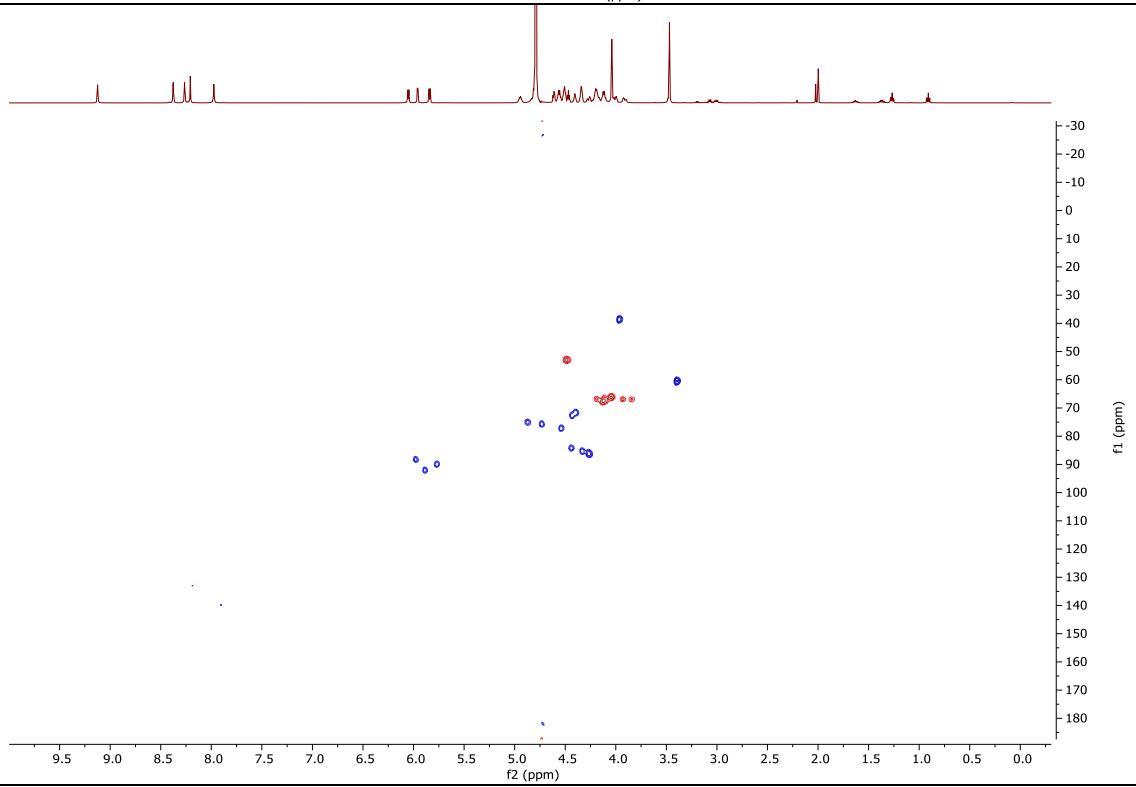

### m<sup>7</sup>GpppG-carb-CH<sub>2</sub>-tr-ApG (both isomers) 10a and 10b

|                           |                                                                                                                                                         |
|---------------------------|---------------------------------------------------------------------------------------------------------------------------------------------------------|
| Structure 10a             | 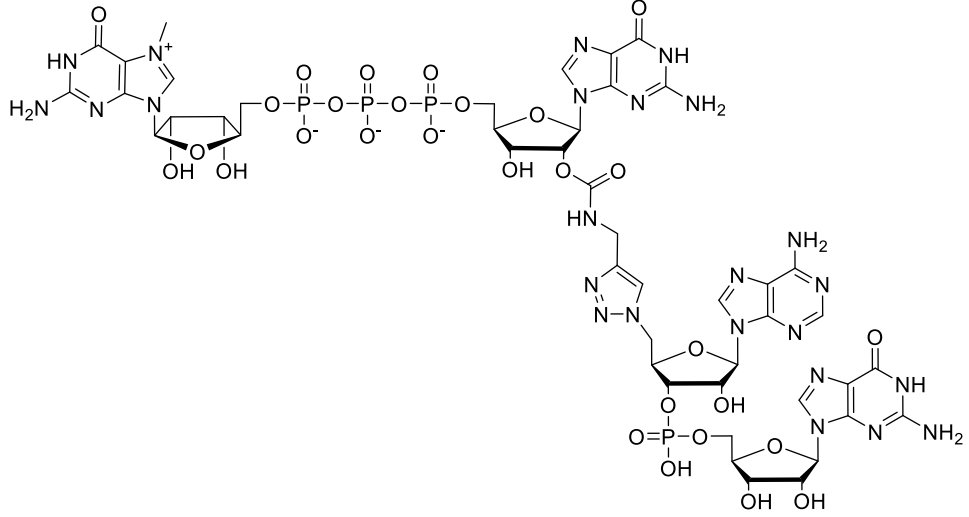                                                                      |
| Structure 10b             |                                                                      |
| HPLC Profile (isomer 10a) |  <p>Intensity, mV</p> <p>R.Time, min</p> <p>— Absorption 254 nm</p> |

HPLC Profile (isomer 10b)

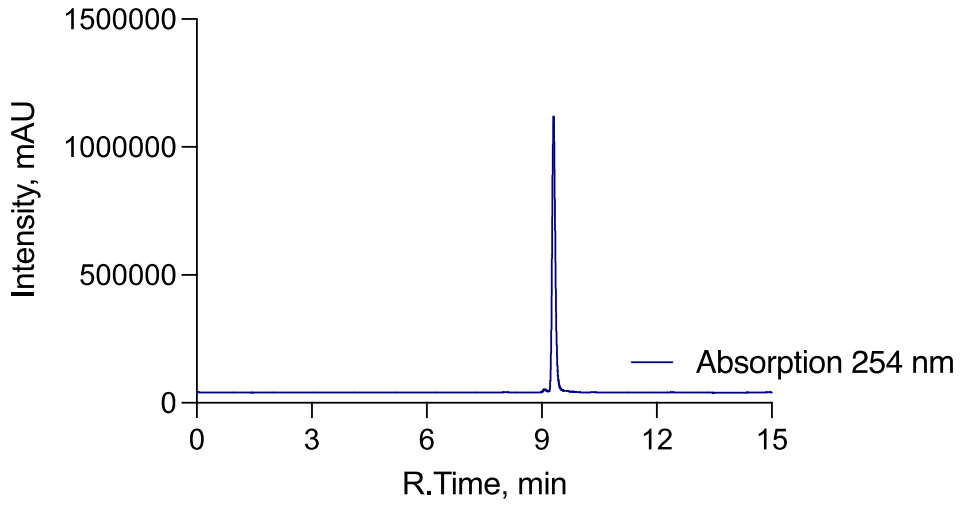

HR MS (isomer 10a)

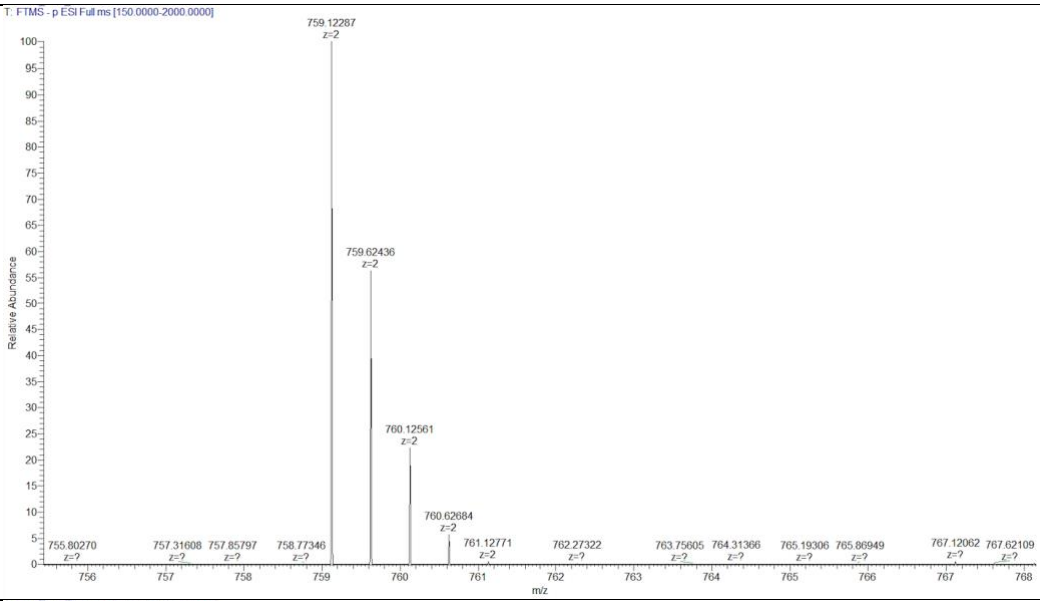

HR MS (isomer 10b)

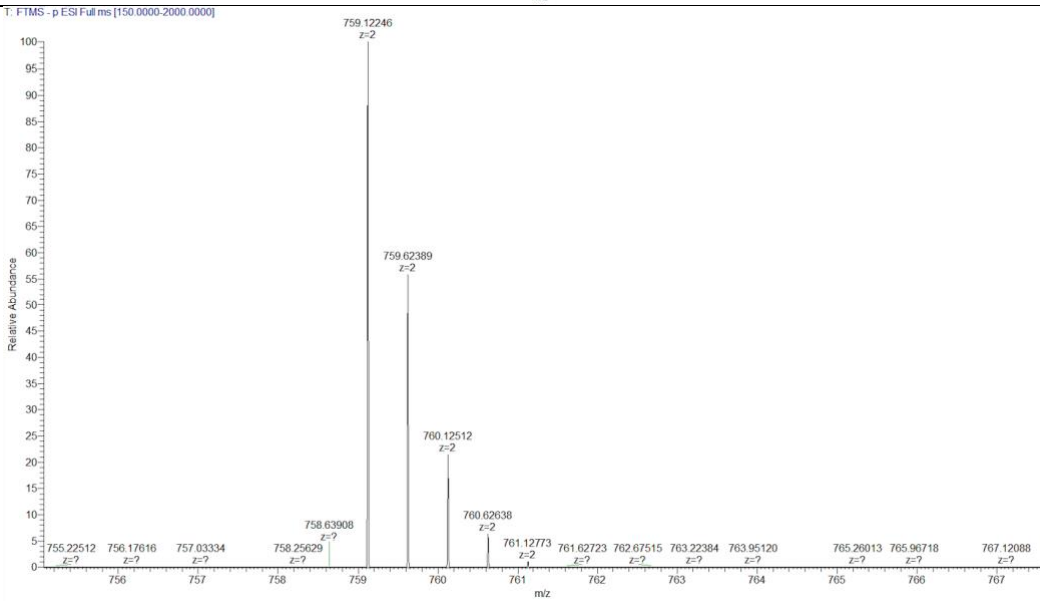

# <sup>1</sup>H NMR

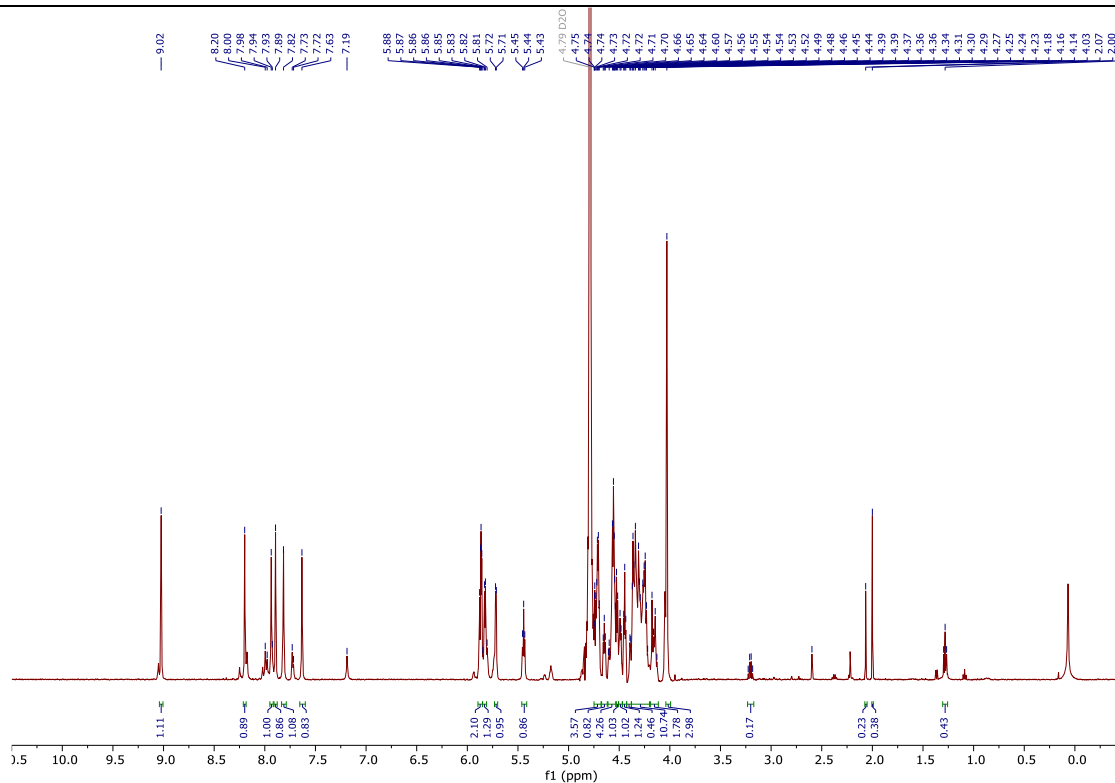

# <sup>31</sup>P NMR

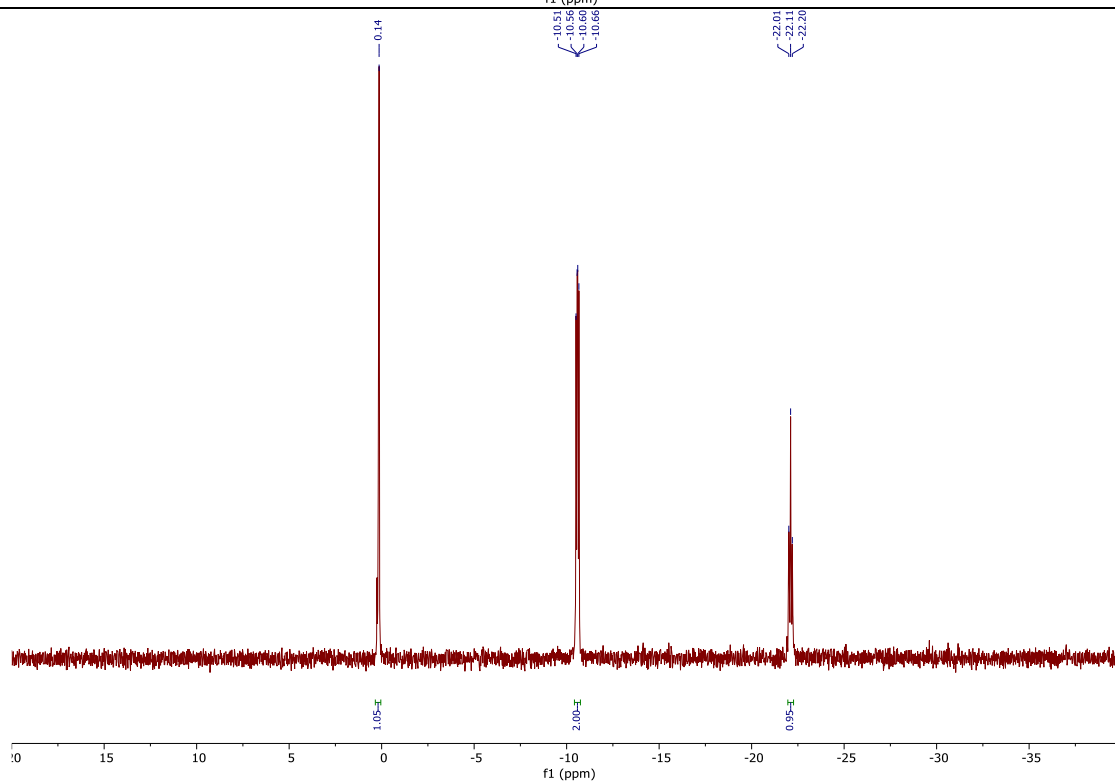

<sup>1</sup>H-<sup>1</sup>H COSY NMR

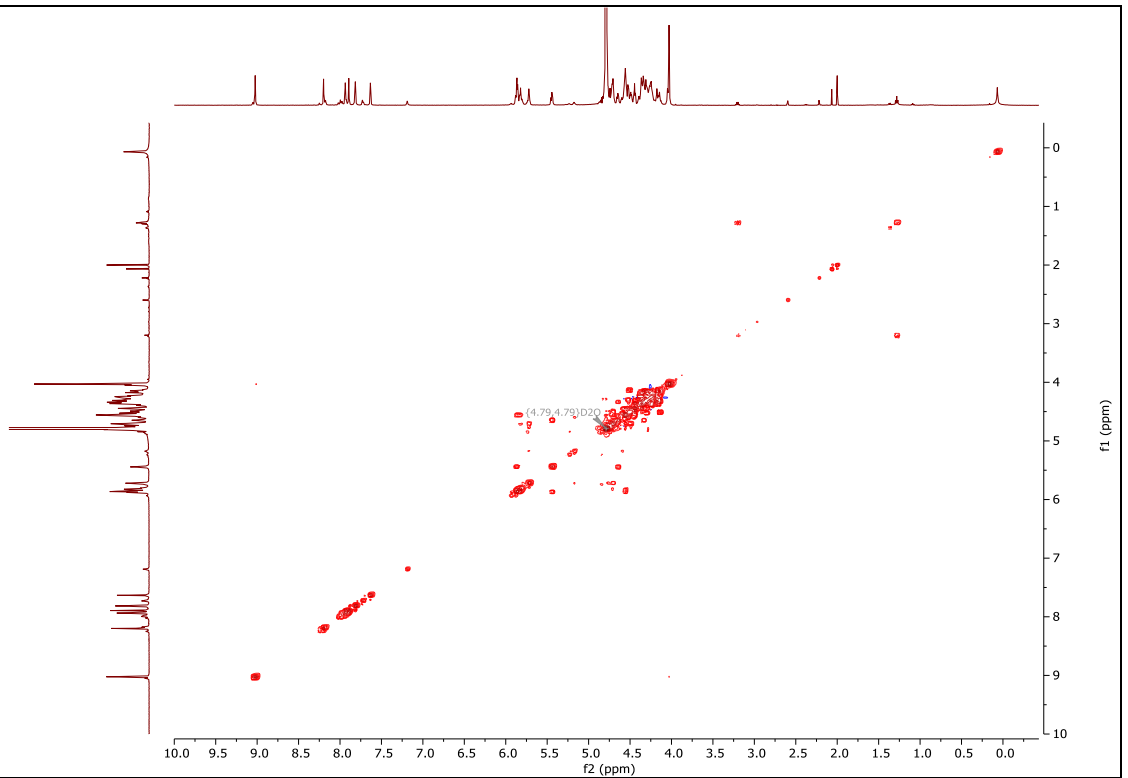

<sup>13</sup>C-<sup>1</sup>H HSQC

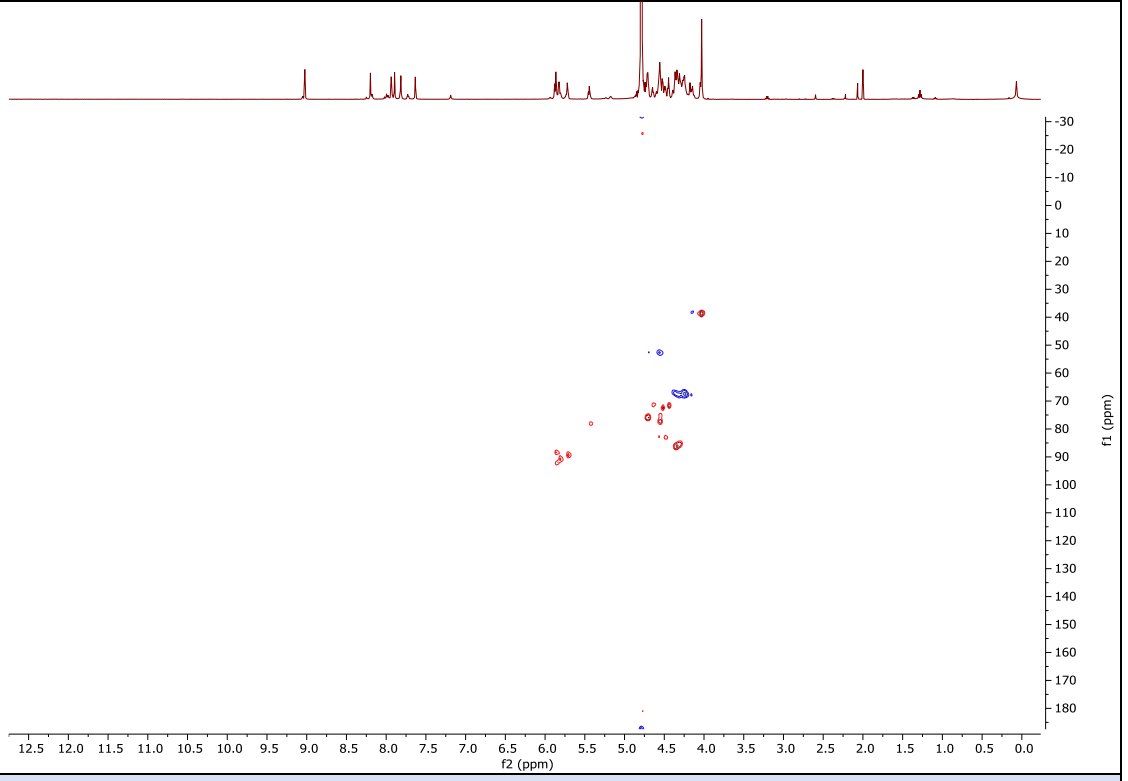



<sup>1</sup>H NMR

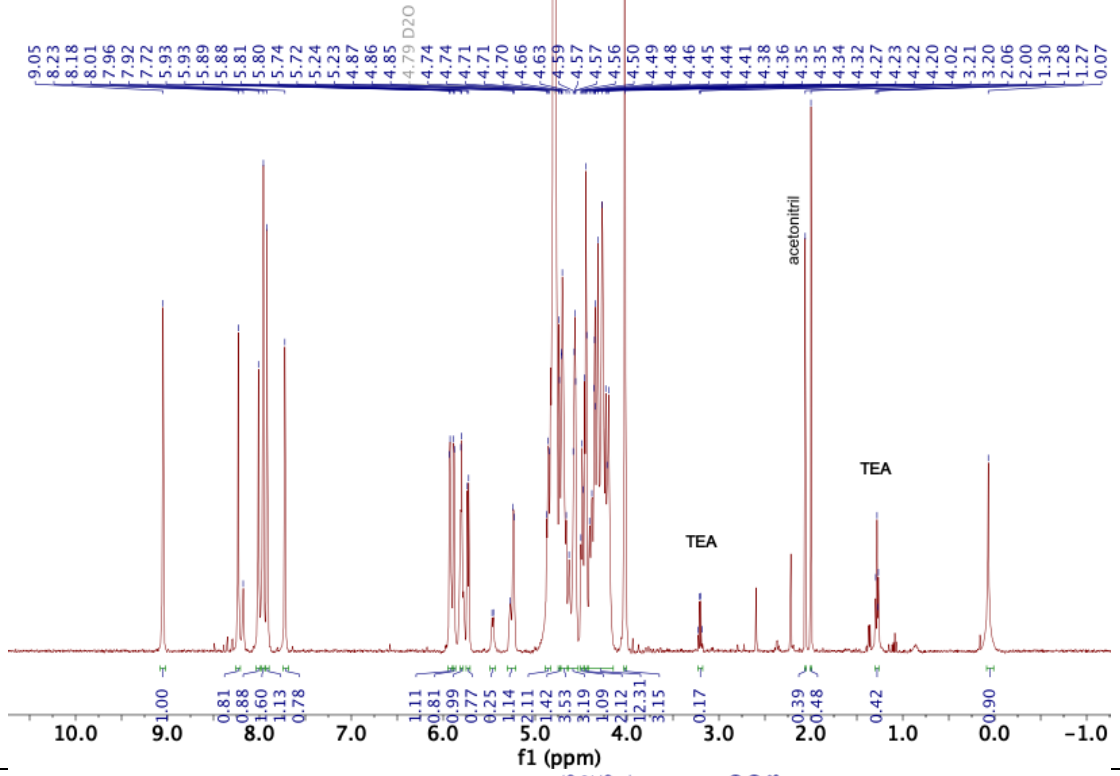

<sup>31</sup>P NMR

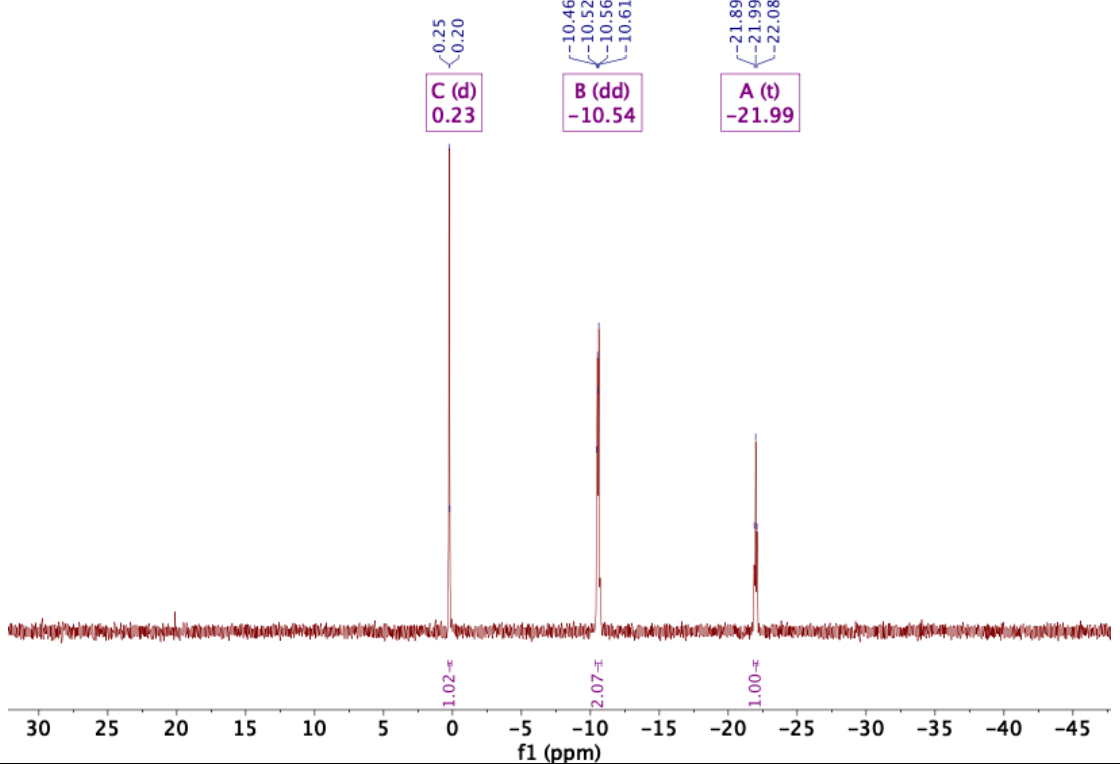

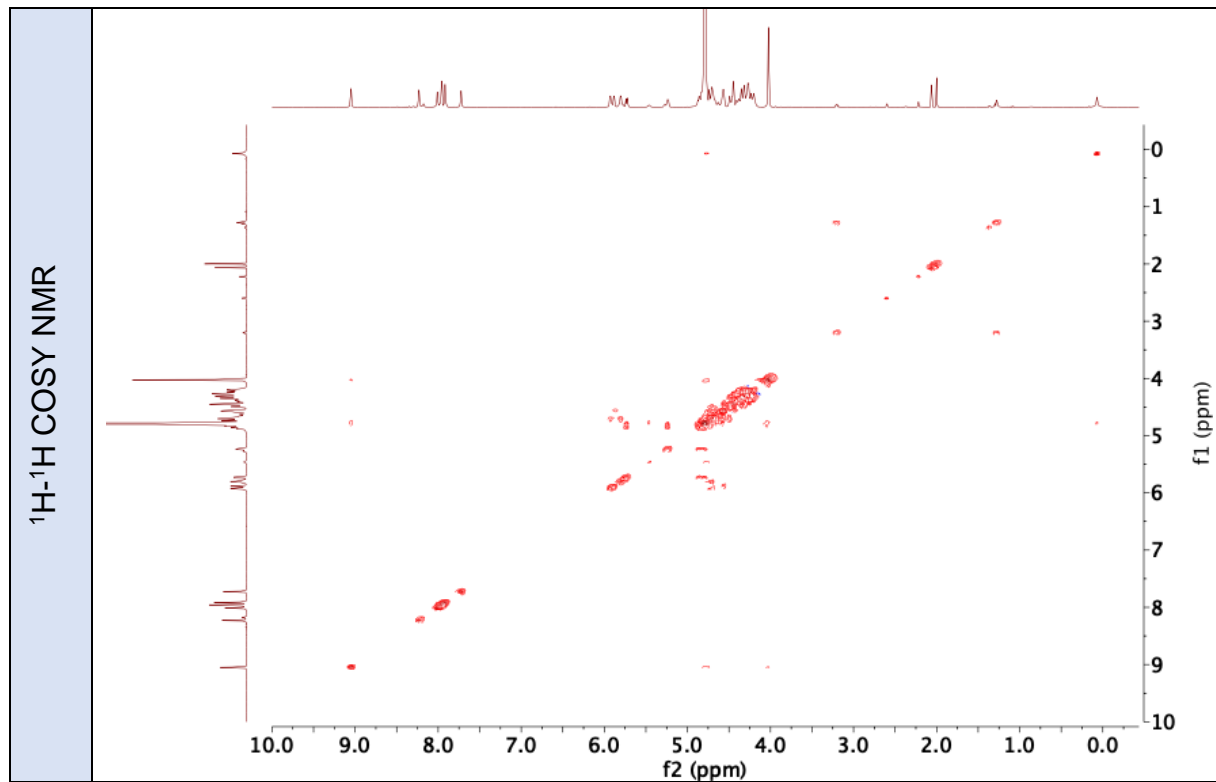

**2'-OMe-3'-OC<sub>3</sub>H<sub>3</sub>-adenosine**

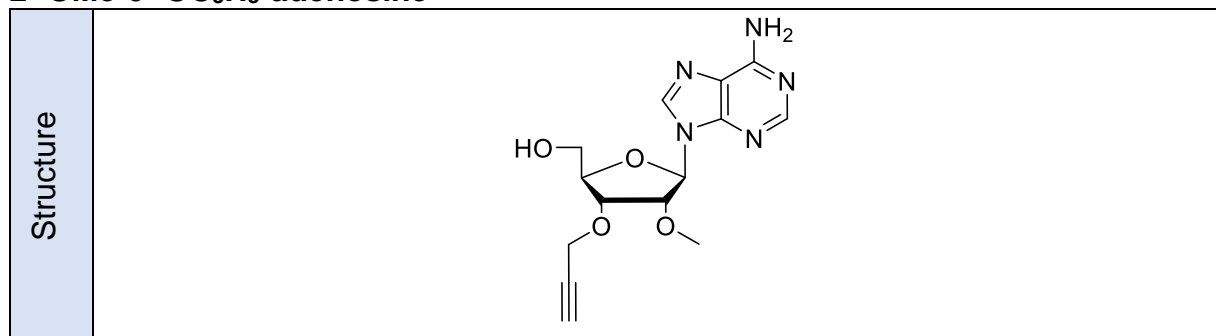

# <sup>1</sup>H NMR

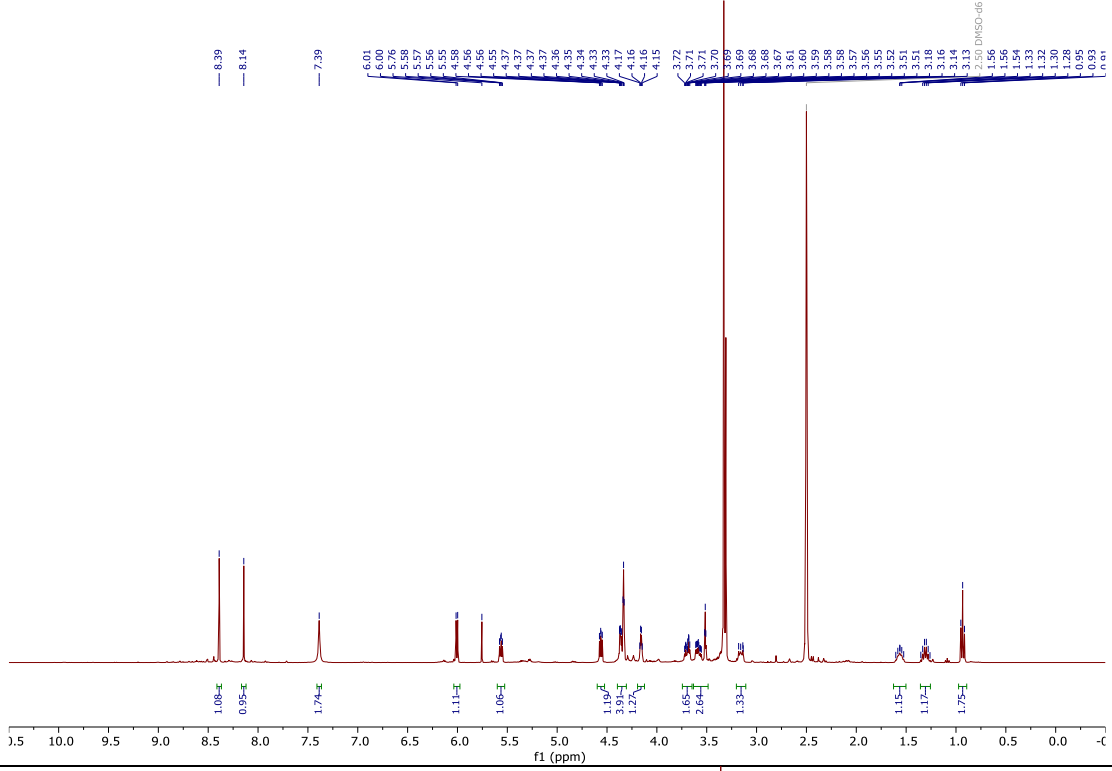

# <sup>1</sup>H-<sup>1</sup>H COSY NMR

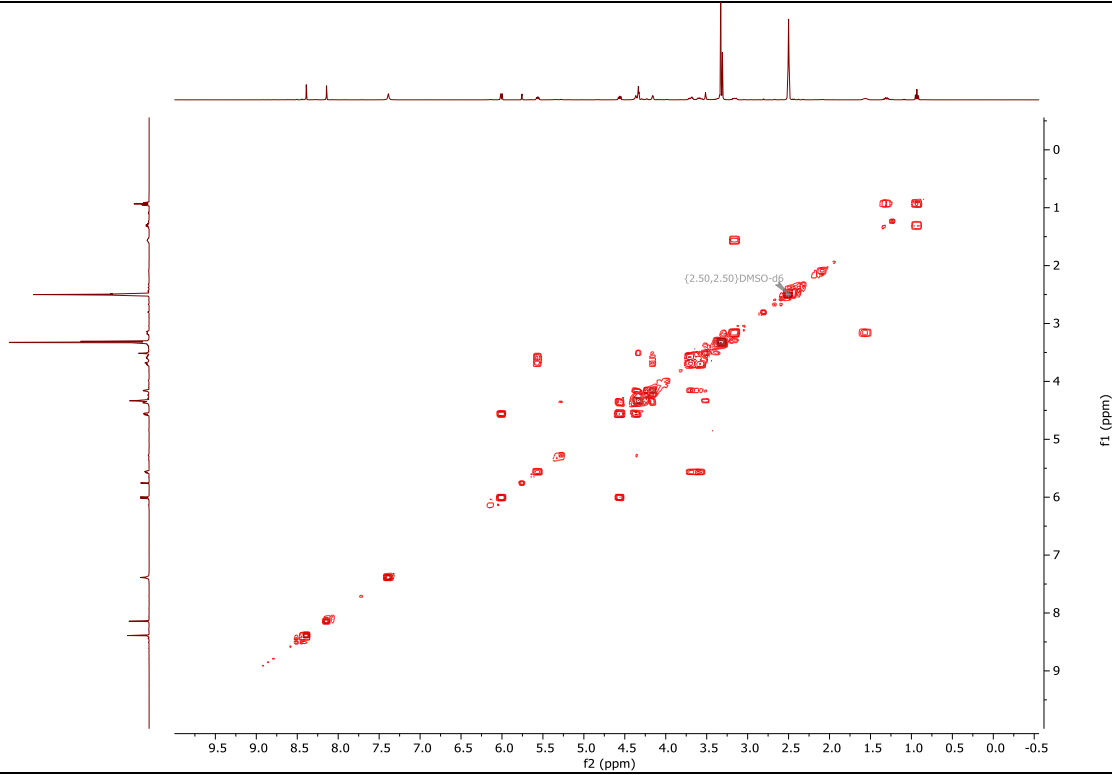

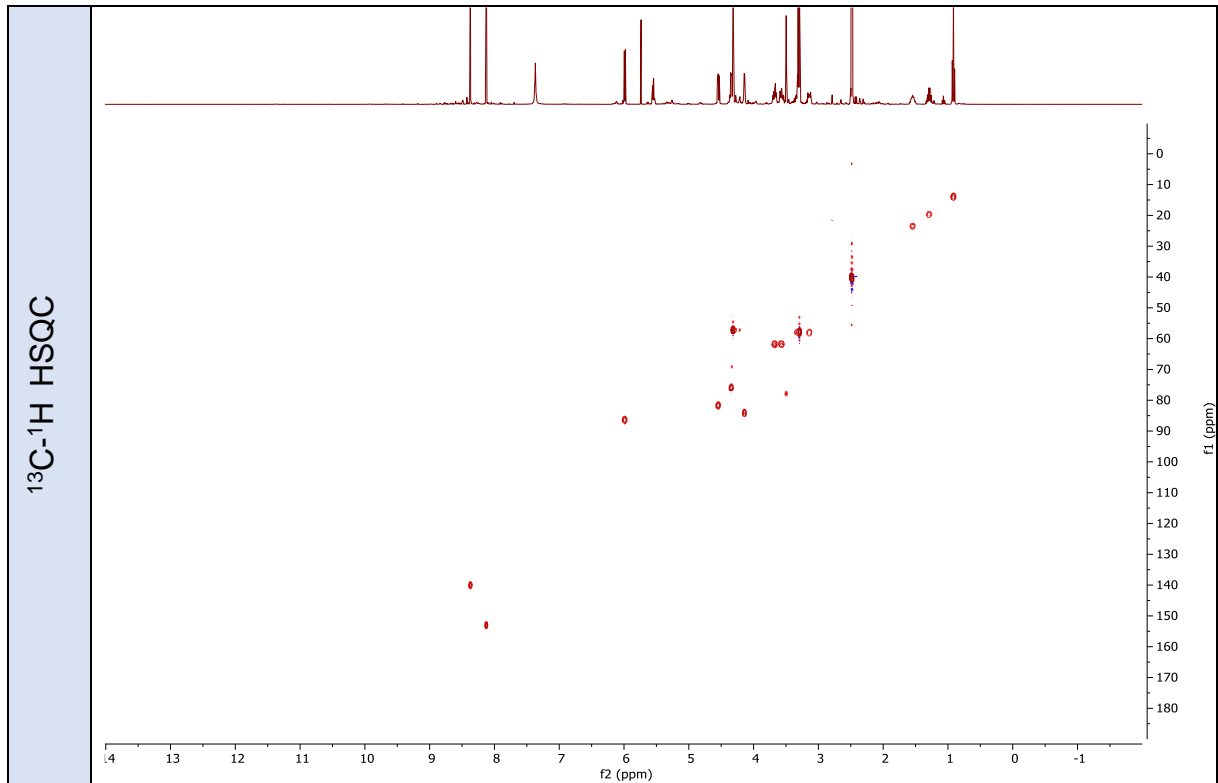

**5'-monophosphate 2'-OMe-3'-OC<sub>3</sub>H<sub>3</sub> adenosine (2'-OMe-3'-OC<sub>3</sub>H<sub>3</sub>AMP)**

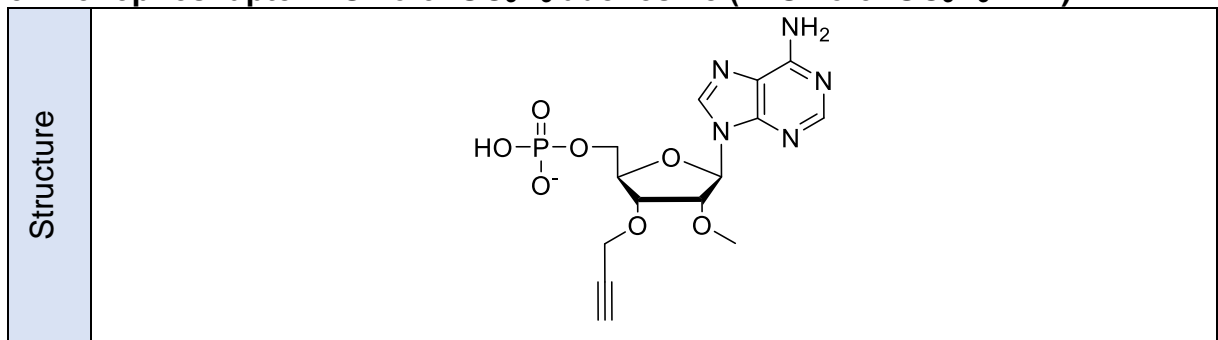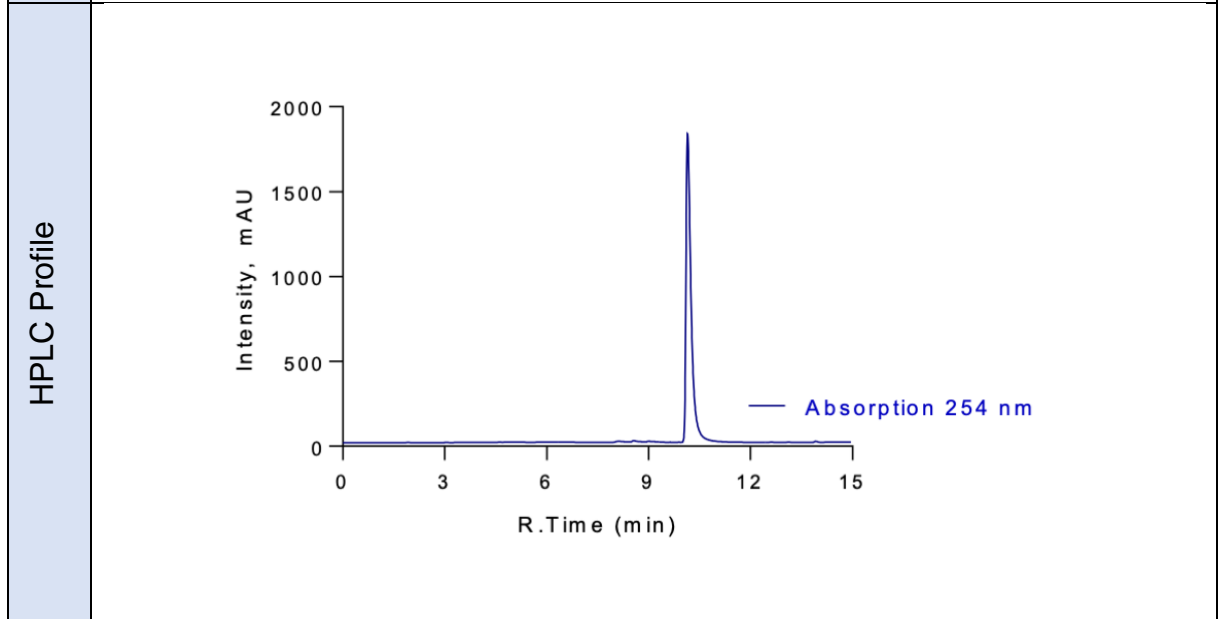



<sup>31</sup>P NMR

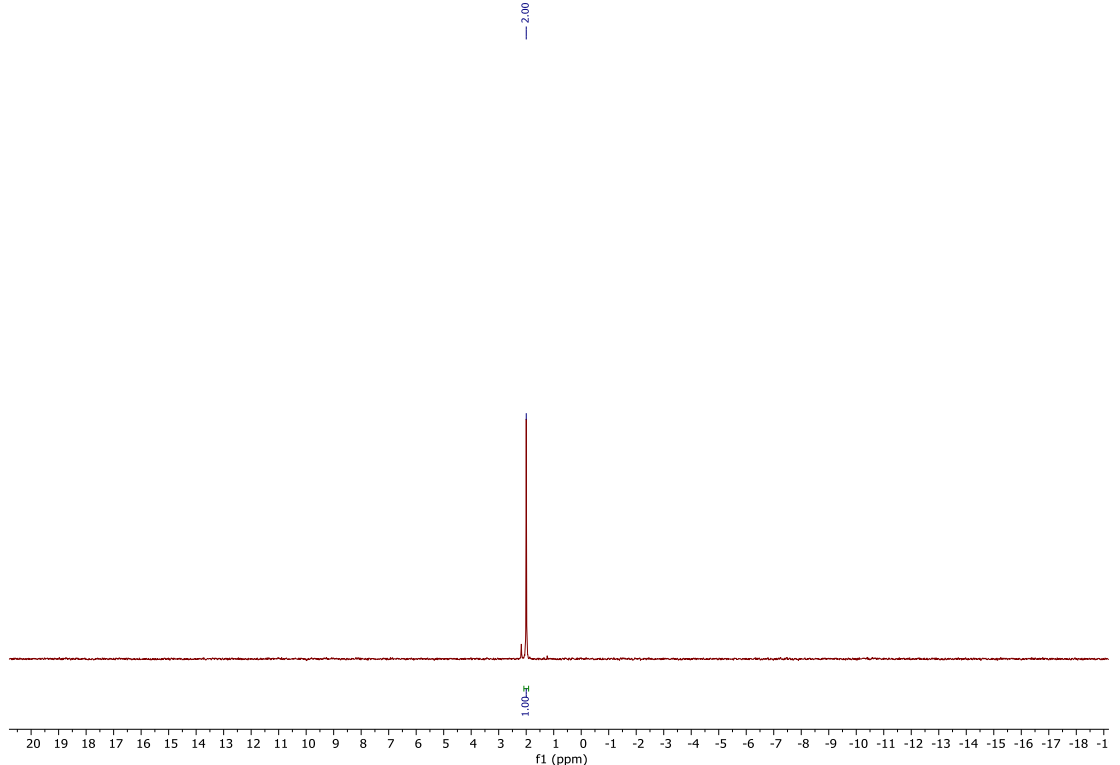

<sup>1</sup>H-<sup>1</sup>H COSY NMR

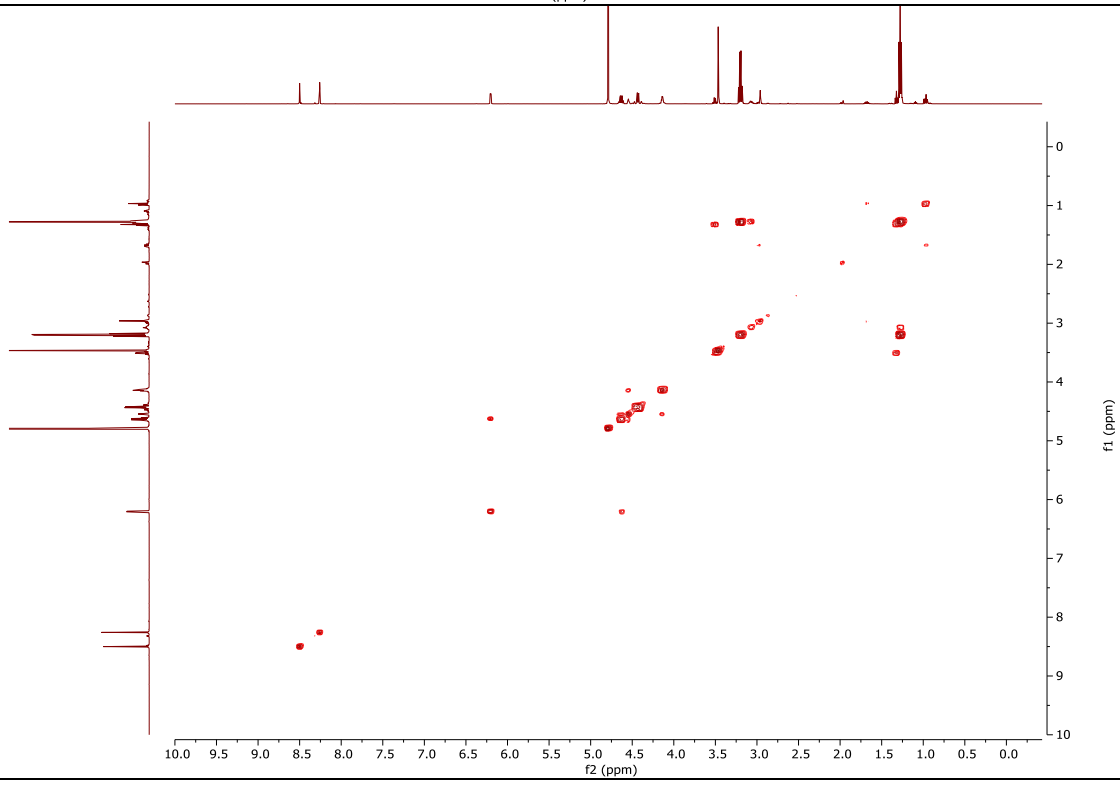

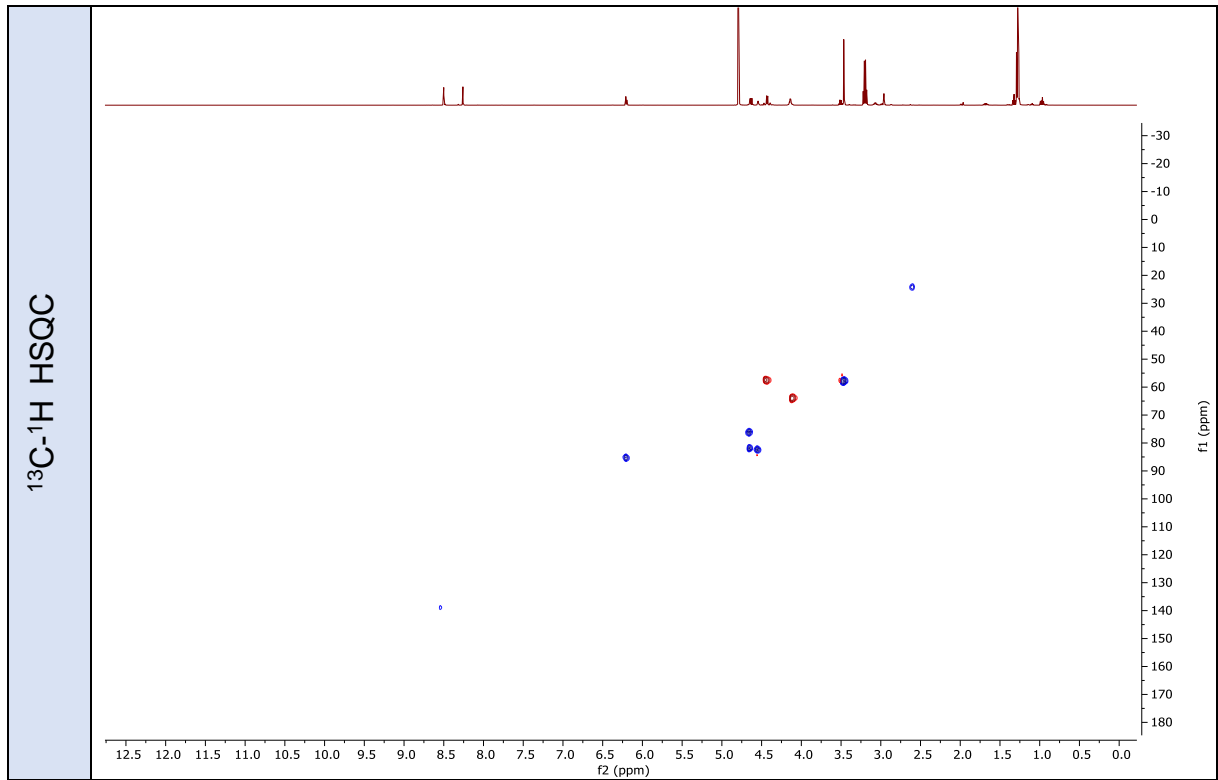

**$\text{m}^7\text{GpppA-2'OMe-3'-OC}_3\text{H}_3$**

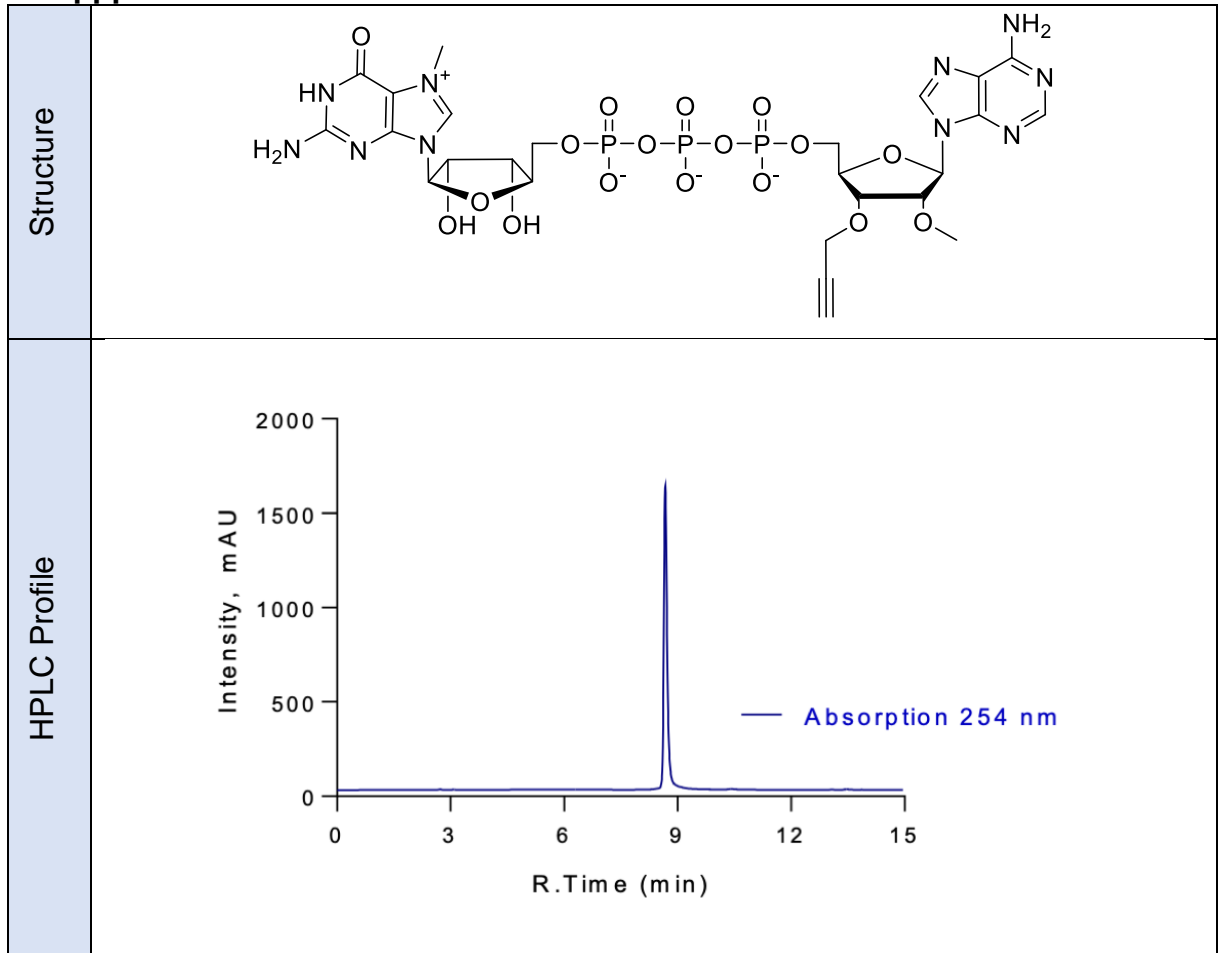

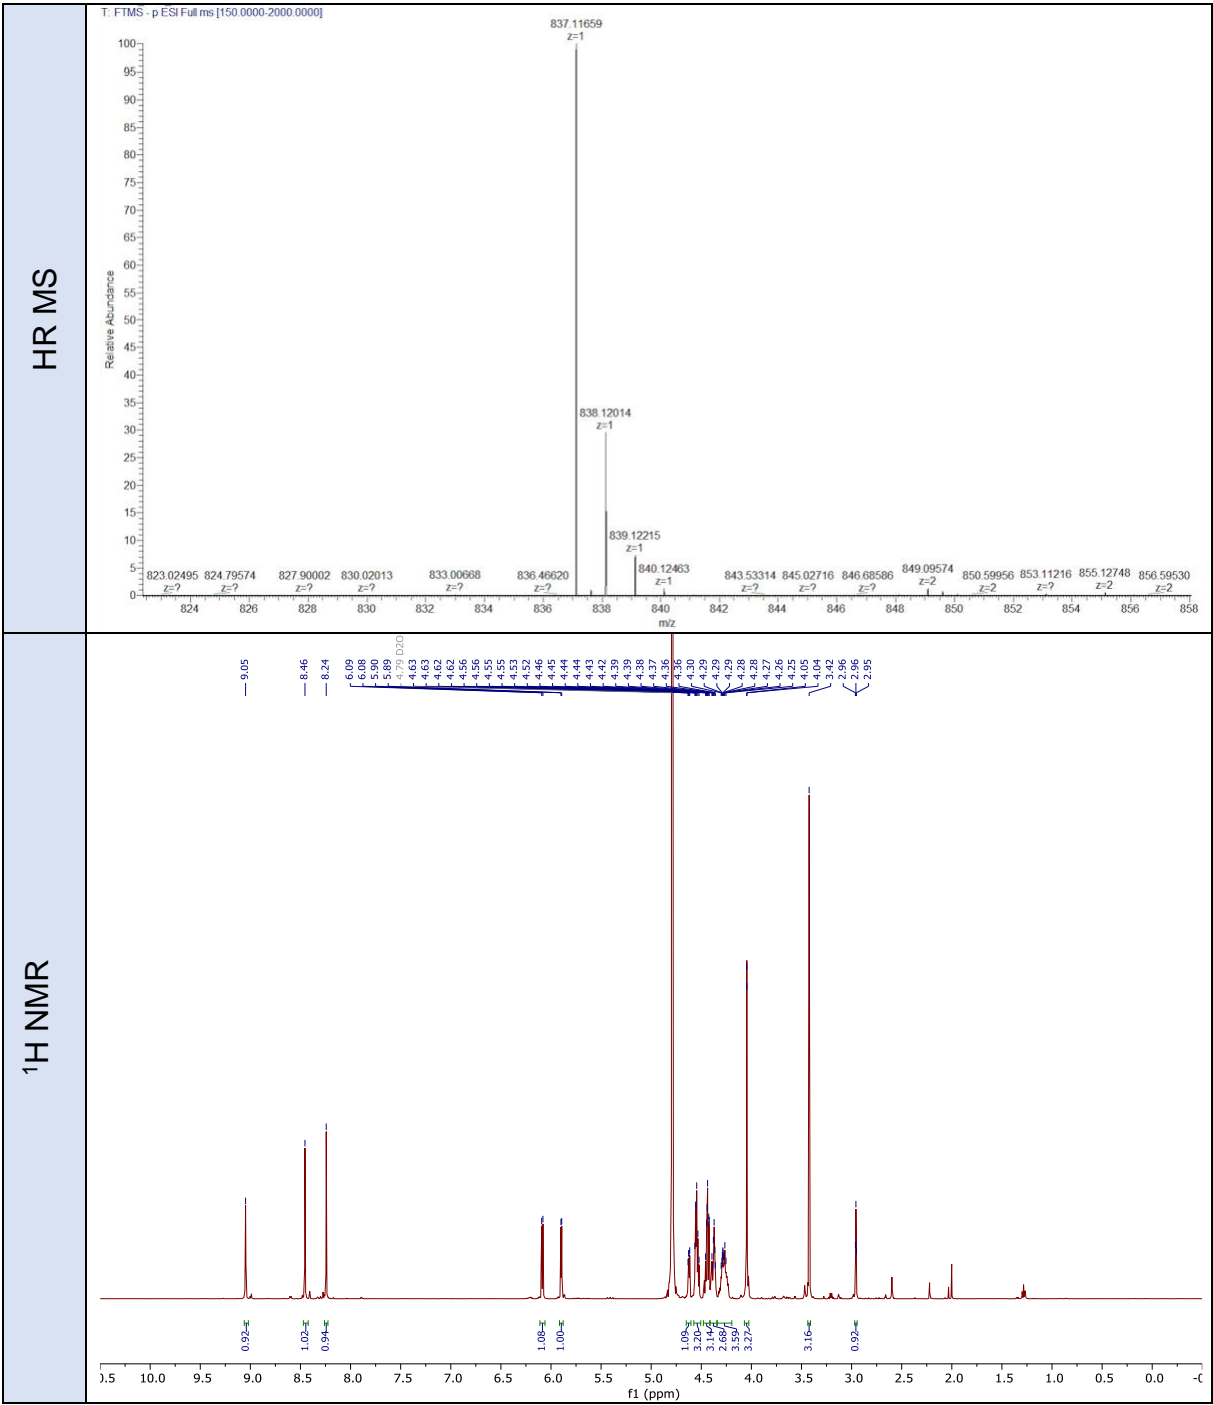



<sup>31</sup>P NMR

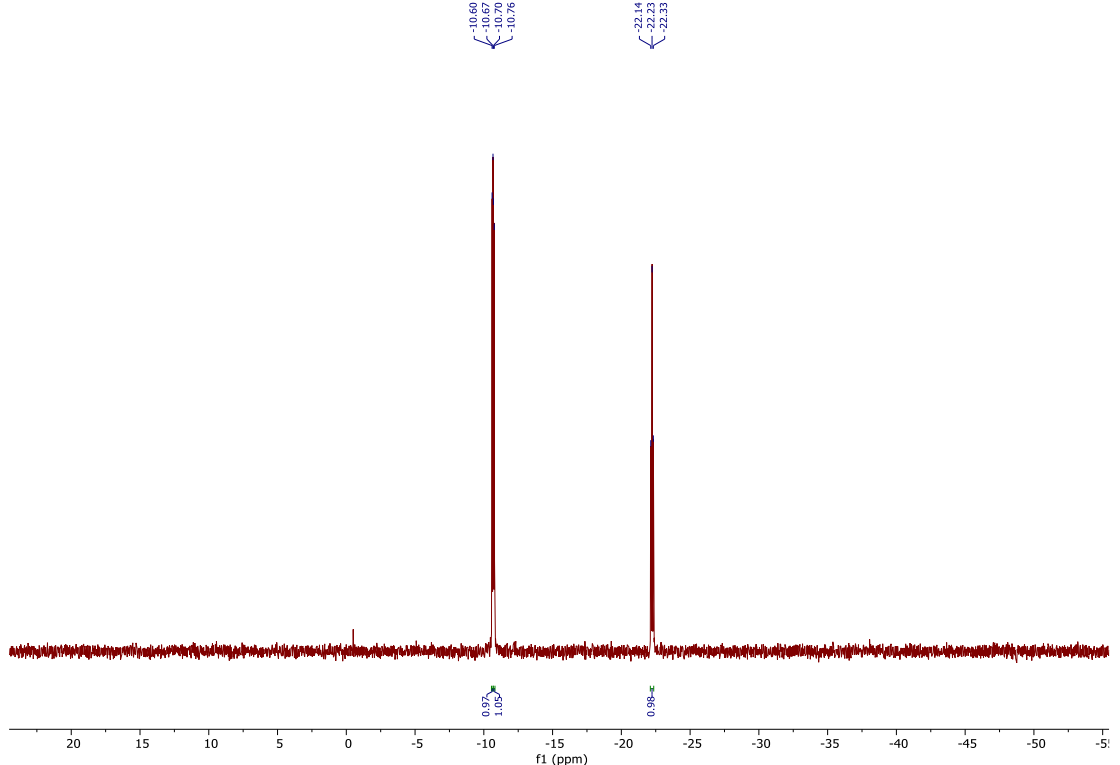

<sup>1</sup>H-<sup>1</sup>H COSY NMR

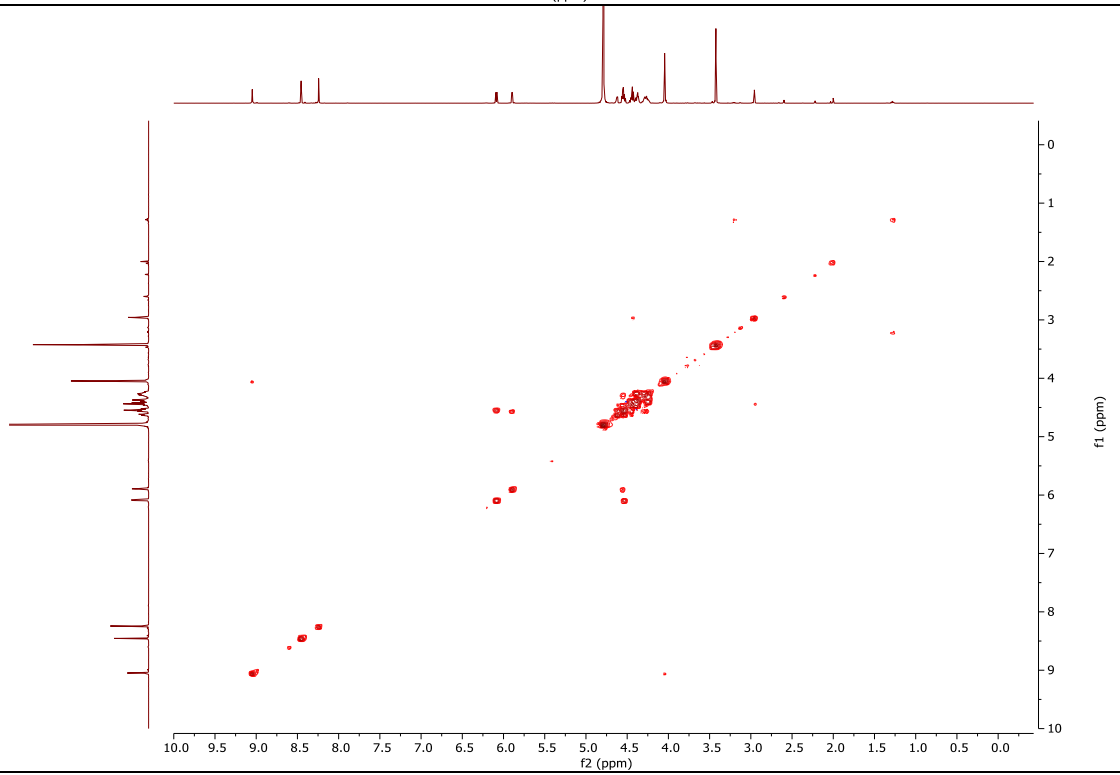

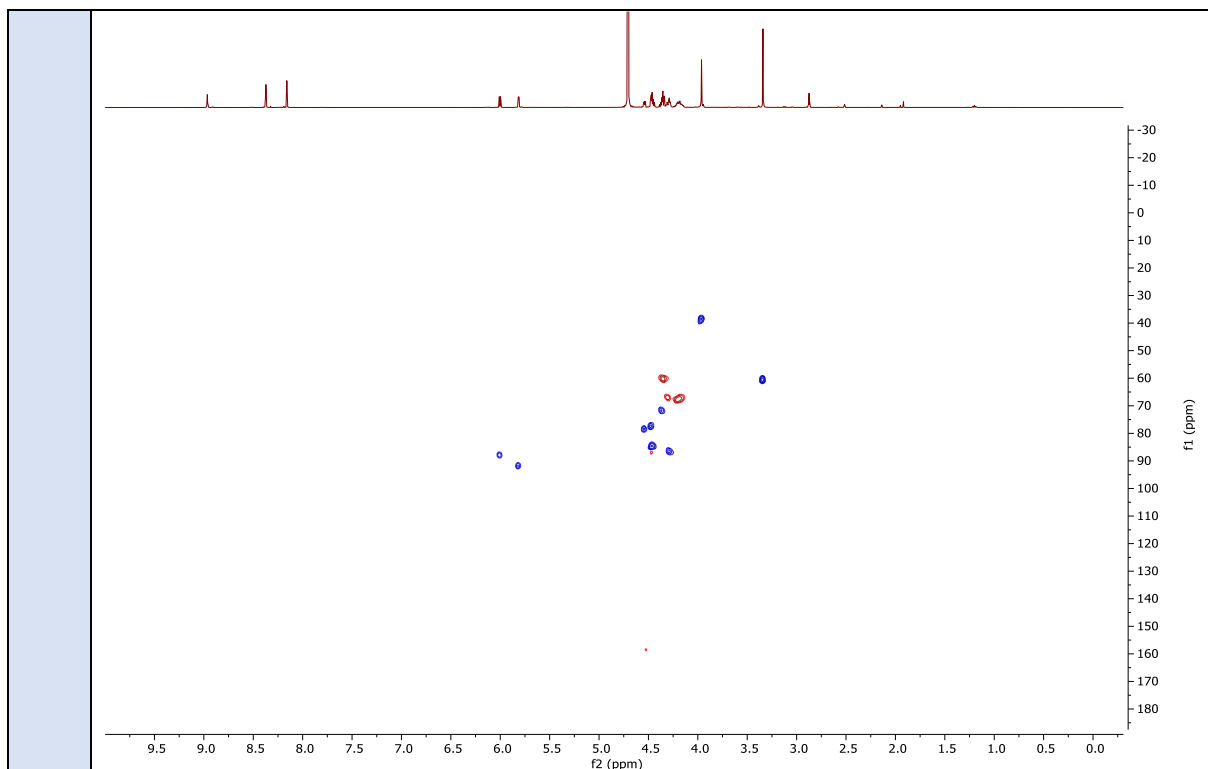

**m<sup>7</sup>GpppA<sub>m</sub>-3'-OCH<sub>2</sub>-tr-G 11**

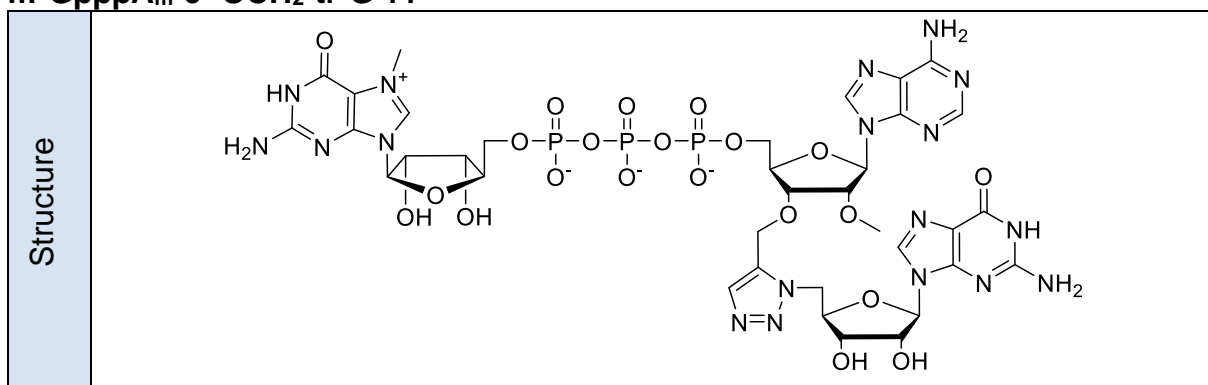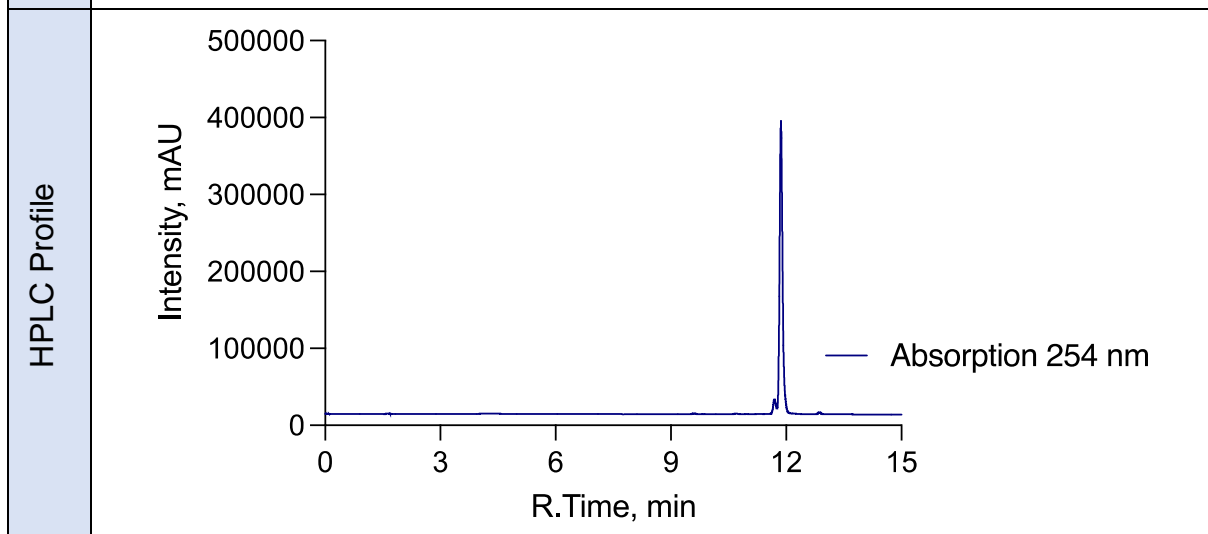

# HR MS

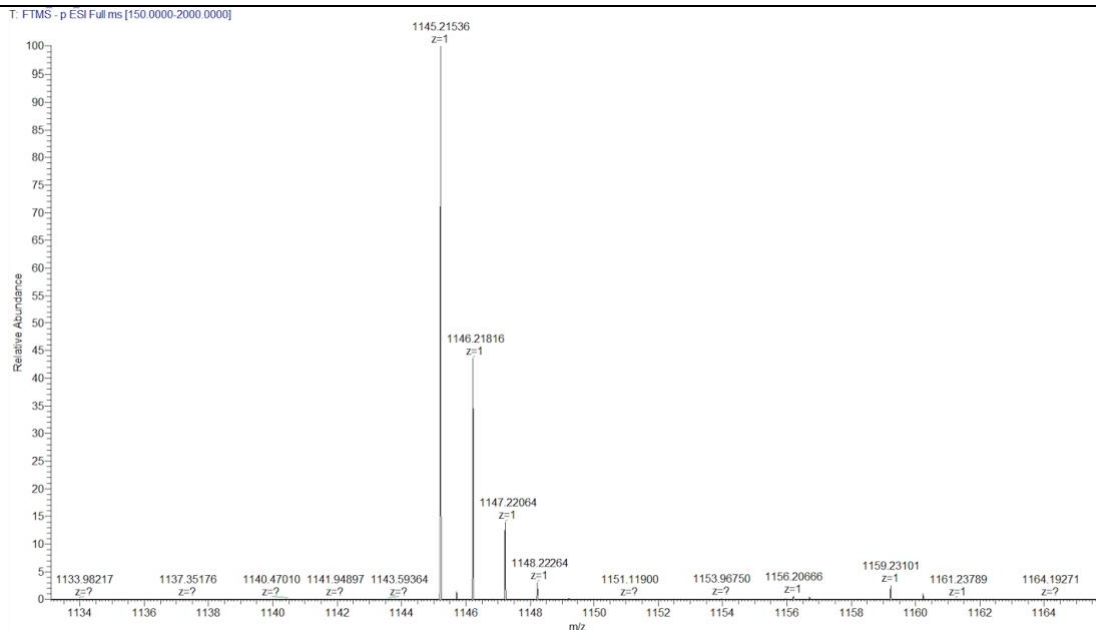

# <sup>1</sup>H NMR

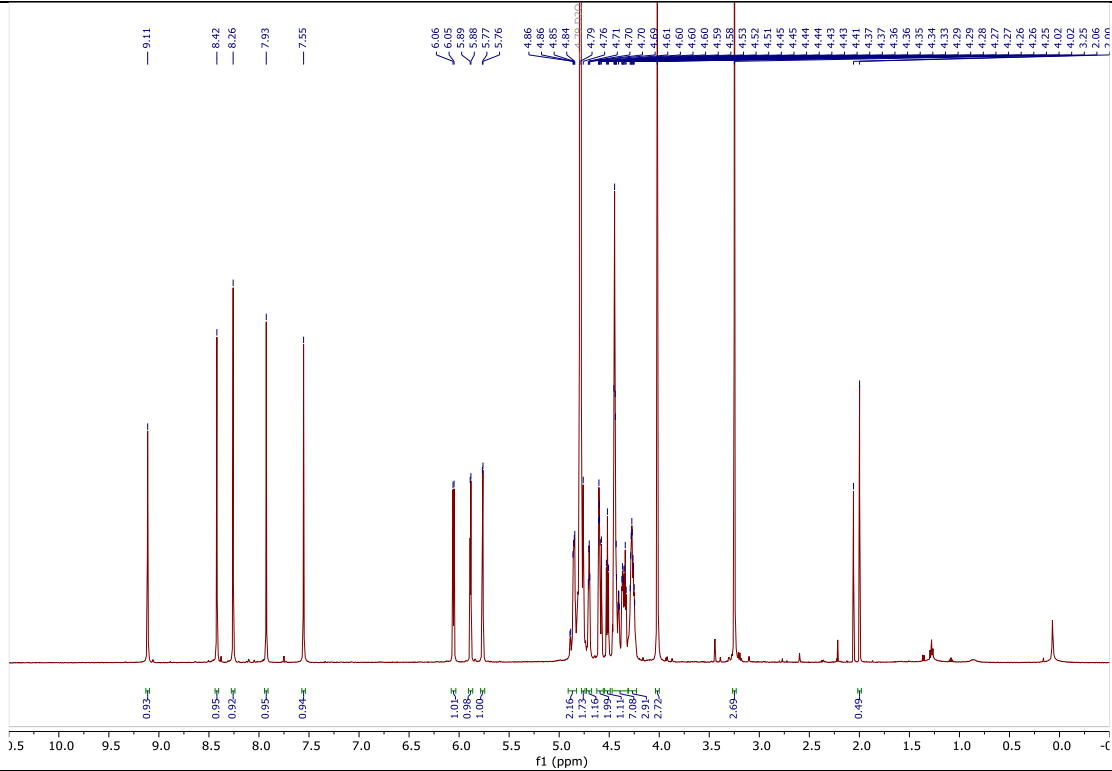

# <sup>31</sup>P NMR

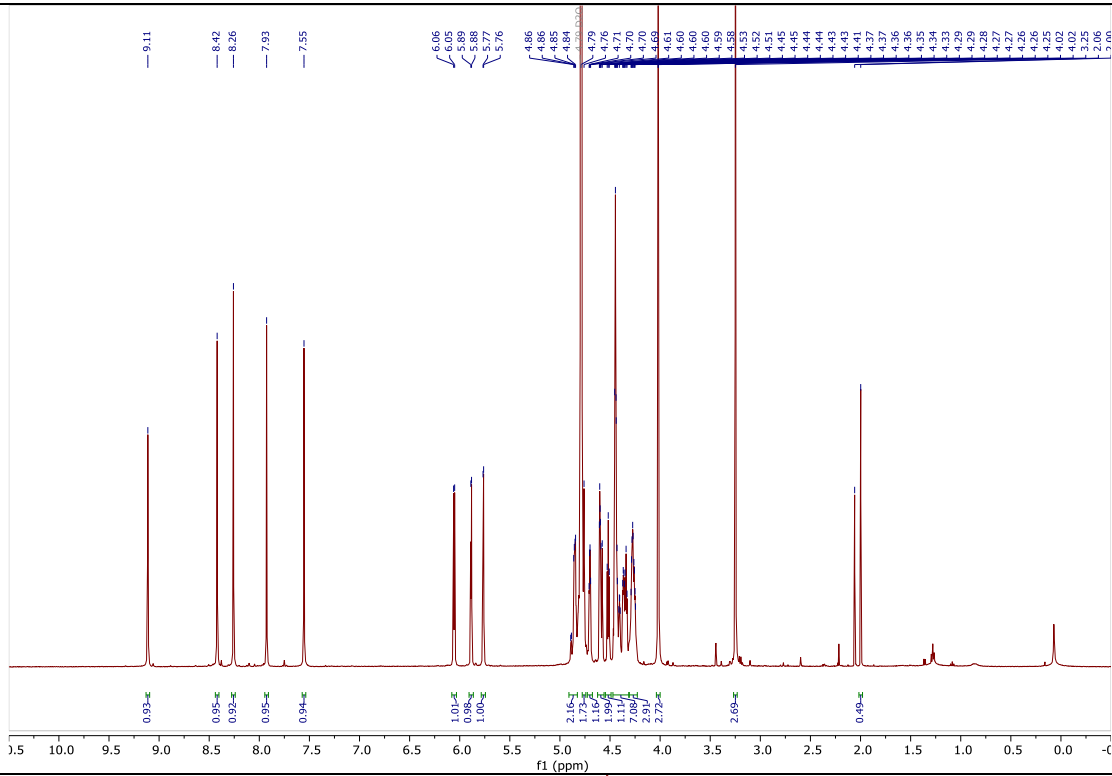

# <sup>1</sup>H-<sup>1</sup>H COSY NMR

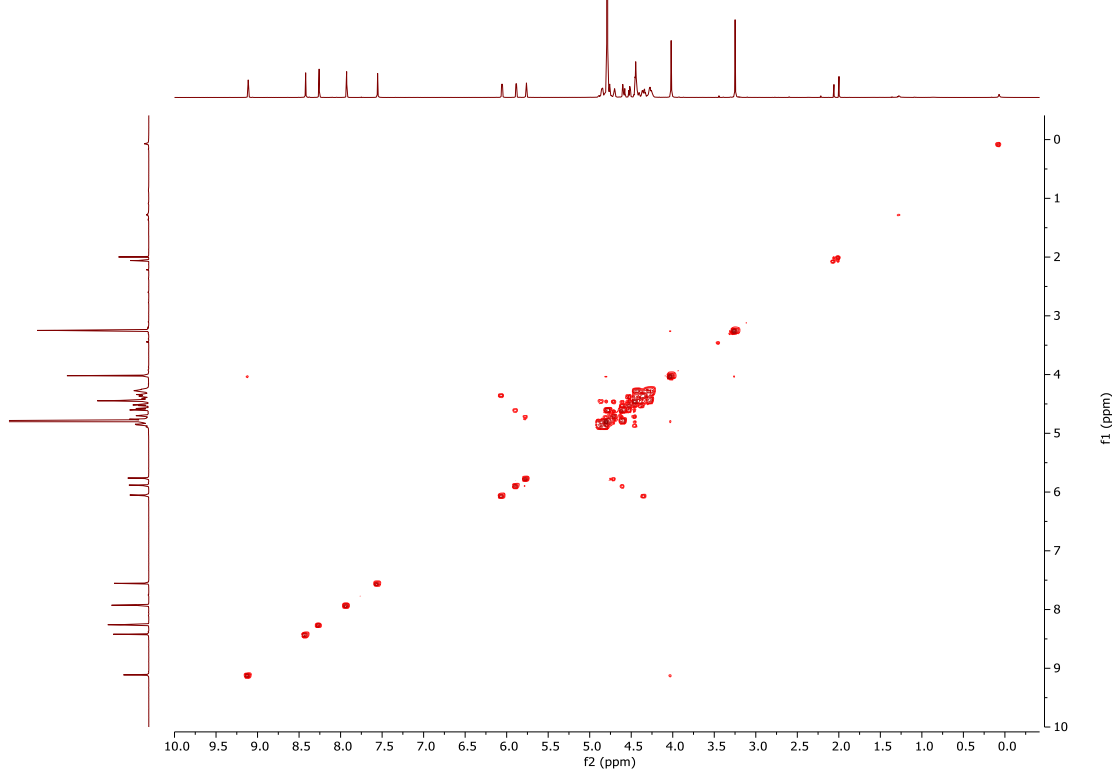

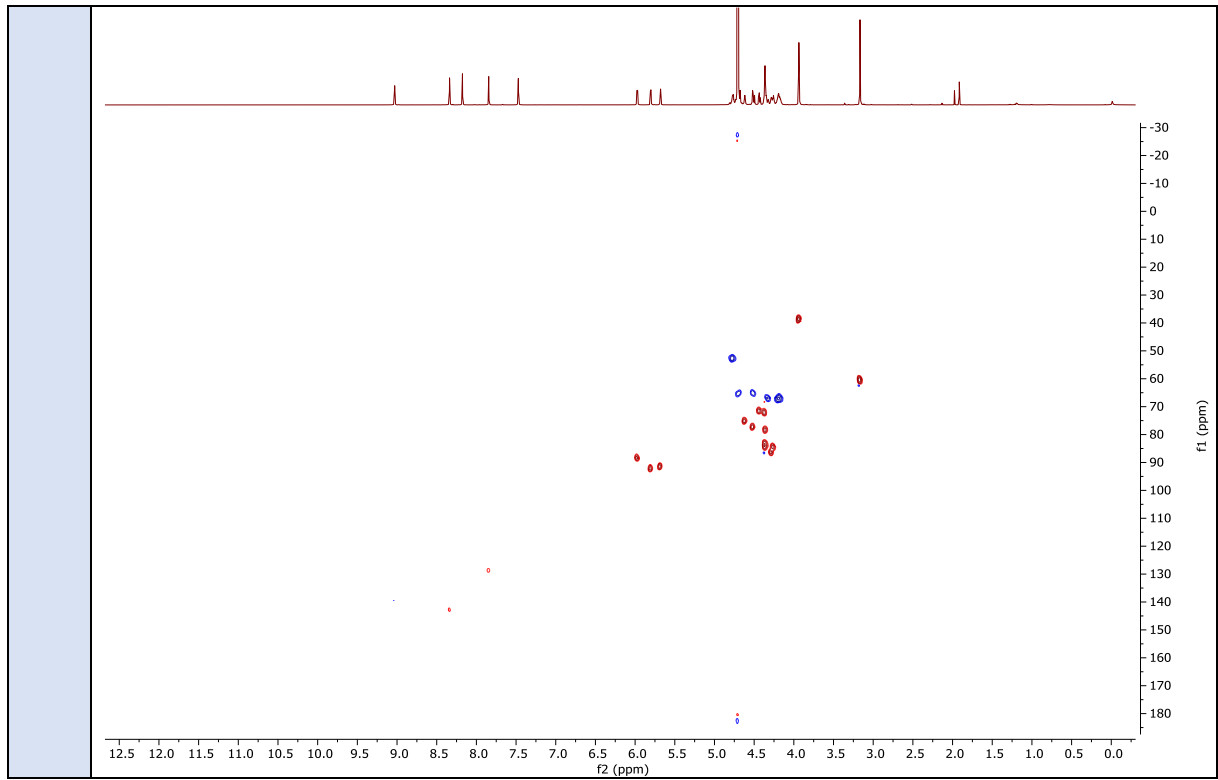

## Figures

Figure S1. mRNA purity

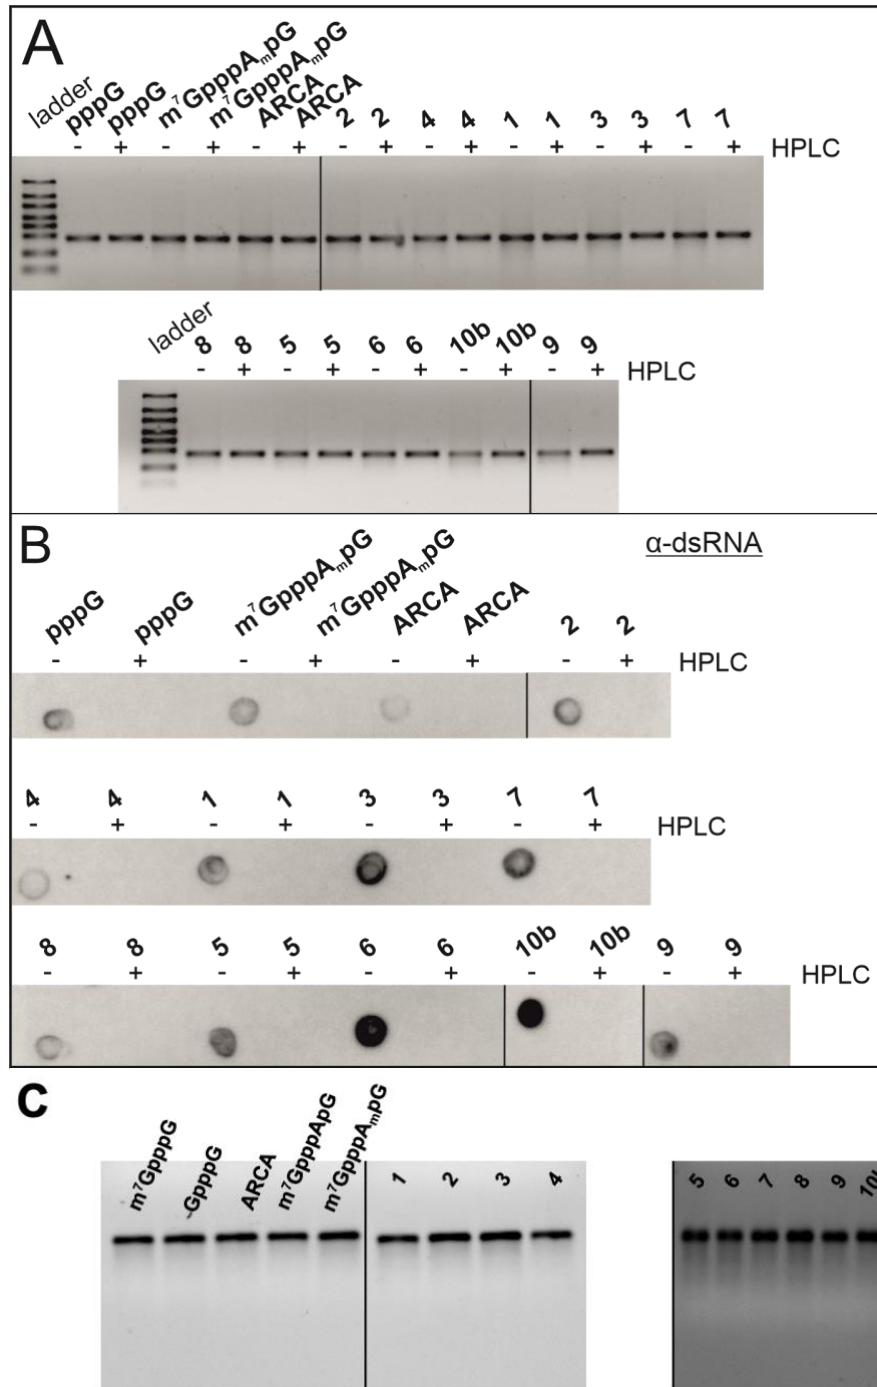

**Figure S1.** A. Representative 1.2% (TBE) agarose gels of capped RNA encoding *Gaussia* luciferase. B. Dot blot analysis 25 ng of mRNAs were analyzed as previously described in Sikorski et al. 2020<sup>3</sup> with modifications. C. Representative 1.2% (TBE) agarose gels of capped RNA encoding *Gaussia* luciferase. mRNAs were purified using a commercial kit and used in RRL experiments.

**Figure S2. Luciferase activity in rabbit reticulocyte lysate**

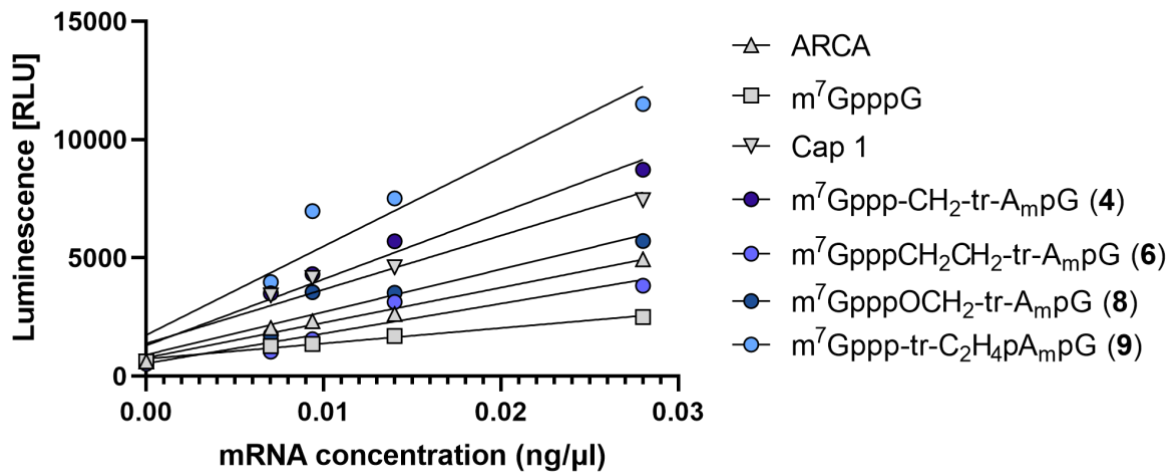

**Figure S2.** Luciferase activity produced by translation of mRNAs capped with various cap analogues in rabbit reticulocyte lysate – results of a single experiment.

**Figure S3. Susceptibility to degradation by hDCP1/DCP2 complex.**

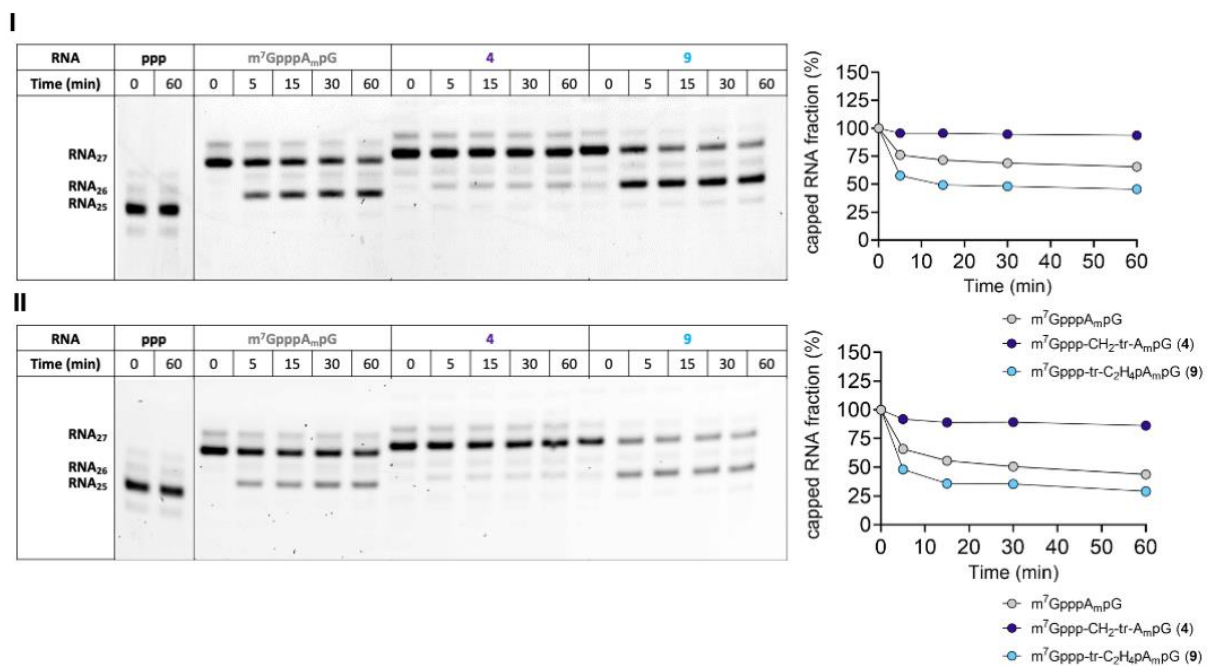

**Figure S2.** Susceptibility to degradation by hDCP1/DCP2 complex. Two separate repetitions. Experiment: 20 ng of capped RNA was subjected to 11 nM hDCP1/DCP2 in 50 mM Tris/HCl pH 8.0, 50 mM NH<sub>4</sub>Cl, 0.01% Igepal with addition of 1 mM DTT, 5 mM MgCl<sub>2</sub> and 2 mM MnCl<sub>2</sub> at 37°C. Reactions were stopped at particular time points (5, 15, 30 and 60 min) and analysed by PAGE (15% acrylamide / 7 M urea / TBE gel) using SyberGold staining. Capped RNA fractions were calculated based on densitometric analysis of bands intensities.

RNA<sub>25</sub> - uncapped RNA (control).

RNA<sub>27</sub> - RNA capped with m<sup>7</sup>GpppAm<sub>m</sub>P G, cap 4 or cap 9.

RNA<sub>26</sub> - RNA decapped by hDCP1/DCP2 complex.

- (1) Walczak, S.; Nowicka, A.; Kubacka, D.; Fac, K.; Wanat, P.; Mroczek, S.; Kowalska, J.; Jemielity, J. A novel route for preparing 5' cap mimics and capped RNAs: phosphate-modified cap analogues obtained via click chemistry. *Chemical Science* **2017**, *8* (1), 260-267, Article. DOI: 10.1039/c6sc02437h.
- (2) Hebert, N.; Beck, A.; Lennox, R. B.; Just, G. A NEW REAGENT FOR THE REMOVAL OF THE 4-METHOXYBENZYL ETHER - APPLICATION TO THE SYNTHESIS OF UNUSUAL MACROCYCLIC AND BOLAFORM PHOSPHATIDYLCHOLINES. *Journal of Organic Chemistry* **1992**, *57* (6), 1777-1783, Article. DOI: 10.1021/jo00032a033.
- (3) Sikorski, P. J.; Warminski, M.; Kubacka, D.; Ratajczak, T.; Nowis, D.; Kowalska, J.; Jemielity, J. The identity and methylation status of the first transcribed nucleotide in eukaryotic mRNA 5' cap modulates protein expression in living cells. *Nucleic Acids Research* **2020**, *48* (4), 1607-1626, Article. DOI: 10.1093/nar/gkaa032.
